# Supplementary material for: Comparison of Survival Outcomes Between Local Excision and Radical Resection in Patients With Anorectal Malignant Melanoma
Source: Research Square preprint supplement (doi:10.21203/rs.3.rs-8050812/v1), 2025-11-26
Supplement: Supplementary file 1 [file 48ed854bb1dc08ecdbf7456f.xlsx]

## Sheet: Sheet2
Age recode with <1 year olds	Sex	Year of diagnosis	Race recode (W, B, AI, API)	Origin recode NHIA (Hispanic, Non-Hisp)	Race and origin recode (NHW, NHB, NHAIAN, NHAPI, Hispanic)	Site recode ICD-O-3/WHO 2008	Behavior code ICD-O-3	TNM 7/CS v0204+ Schema (thru 2017)	TNM 7/CS v0204+ Schema recode	AYA site recode 2020 Revision	Lymphoid neoplasm recode 2021 Revision	ICCC site recode 3rd edition/IARC 2017	SEER Brain and CNS Recode	CS Schema - AJCC 6th Edition	Primary Site - labeled	Primary Site	Histologic Type ICD-O-3	Behavior recode for analysis	Grade (thru 2017)	Grade Clinical (2018+)	Grade Pathological (2018+)	Laterality	Diagnostic Confirmation	ICD-O-3 Hist/behav	ICD-O-3 Hist/behav, malignant	Histology recode - broad groupings	ICCC site recode extended 3rd edition/IARC 2017	Site recode ICD-O-3/WHO 2008 (for SIRs)	ICCC site recode ICD-O-3/WHO 2008	ICCC site rec extended ICD-O-3/WHO 2008	Histology recode - Brain groupings	Schema ID (2018+)	AJCC ID (2018+)	EOD Schema ID Recode (2010+)	Site recode - rare tumors	AYA site recode/WHO 2008	Combined Summary Stage (2004+)	Summary stage 2000 (1998-2017)	SEER Combined Summary Stage 2000 (2004-2017)	SEER historic stage A (1973-2015)	Derived EOD 2018 T (2018+)	Derived EOD 2018 N (2018+)	Derived EOD 2018 M (2018+)	Derived EOD 2018 Stage Group (2018+)	Derived AJCC Stage Group, 7th ed (2010-2015)	Derived AJCC T, 7th ed (2010-2015)	Derived AJCC N, 7th ed (2010-2015)	Derived AJCC M, 7th ed (2010-2015)	Derived SEER Cmb Stg Grp (2016-2017)
65-69 years	Male	2005	White	Non-Spanish-Hispanic-Latino	Non-Hispanic White	Rectum	Malignant	Rectum	Rectum	8.3 Other malignant	Unclassified	XId malignant melanomas	5. All Other Cancer Types	Rectum	C20.9-Rectum, NOS	209	8720	Malignant	Unknown	Blank(s)	Blank(s)	Not a paired site	Positive histology	8720/3: Malignant melanoma, NOS	8720/3: Malignant melanoma, NOS	8720-8799: nevi and melanomas	XId Malignant melanomas	Rectum	XI(d) Malignant melanomas	XI(d) Malignant melanomas	Not Brain	Blank(s)	Blank(s)	Blank(s)	37 MALIGNANT MELANOMA OF MUCOSA AND EXTRACUTANEOUS	7.1 Melanoma	Distant	Distant	Distant site(s)/node(s) involved	Distant	Blank(s)	Blank(s)	Blank(s)	Blank(s)	Blank(s)	Blank(s)	Blank(s)	Blank(s)	Blank(s)
55-59 years	Male	2006	White	Non-Spanish-Hispanic-Latino	Non-Hispanic White	Rectum	Malignant	Rectum	Rectum	8.3 Other malignant	Unclassified	XId malignant melanomas	5. All Other Cancer Types	Rectum	C20.9-Rectum, NOS	209	8720	Malignant	Unknown	Blank(s)	Blank(s)	Not a paired site	Positive histology	8720/3: Malignant melanoma, NOS	8720/3: Malignant melanoma, NOS	8720-8799: nevi and melanomas	XId Malignant melanomas	Rectum	XI(d) Malignant melanomas	XI(d) Malignant melanomas	Not Brain	Blank(s)	Blank(s)	Blank(s)	37 MALIGNANT MELANOMA OF MUCOSA AND EXTRACUTANEOUS	7.1 Melanoma	Distant	Distant	Distant site(s)/node(s) involved	Distant	Blank(s)	Blank(s)	Blank(s)	Blank(s)	Blank(s)	Blank(s)	Blank(s)	Blank(s)	Blank(s)
80-84 years	Male	2007	White	Non-Spanish-Hispanic-Latino	Non-Hispanic White	Rectum	Malignant	Rectum	Rectum	8.3 Other malignant	Unclassified	XId malignant melanomas	5. All Other Cancer Types	Rectum	C20.9-Rectum, NOS	209	8720	Malignant	Unknown	Blank(s)	Blank(s)	Not a paired site	Positive histology	8720/3: Malignant melanoma, NOS	8720/3: Malignant melanoma, NOS	8720-8799: nevi and melanomas	XId Malignant melanomas	Rectum	XI(d) Malignant melanomas	XI(d) Malignant melanomas	Not Brain	Blank(s)	Blank(s)	Blank(s)	37 MALIGNANT MELANOMA OF MUCOSA AND EXTRACUTANEOUS	7.1 Melanoma	Localized	Localized	Localized only	Localized	Blank(s)	Blank(s)	Blank(s)	Blank(s)	Blank(s)	Blank(s)	Blank(s)	Blank(s)	Blank(s)
70-74 years	Male	2008	White	Non-Spanish-Hispanic-Latino	Non-Hispanic White	Rectum	Malignant	Rectum	Rectum	8.3 Other malignant	Unclassified	XId malignant melanomas	5. All Other Cancer Types	Rectum	C20.9-Rectum, NOS	209	8720	Malignant	Unknown	Blank(s)	Blank(s)	Not a paired site	Positive histology	8720/3: Malignant melanoma, NOS	8720/3: Malignant melanoma, NOS	8720-8799: nevi and melanomas	XId Malignant melanomas	Rectum	XI(d) Malignant melanomas	XI(d) Malignant melanomas	Not Brain	Blank(s)	Blank(s)	Blank(s)	37 MALIGNANT MELANOMA OF MUCOSA AND EXTRACUTANEOUS	7.1 Melanoma	Regional	Regional	Regional lymph nodes involved only	Regional	Blank(s)	Blank(s)	Blank(s)	Blank(s)	Blank(s)	Blank(s)	Blank(s)	Blank(s)	Blank(s)
60-64 years	Female	2016	Asian or Pacific Islander	Non-Spanish-Hispanic-Latino	Non-Hispanic Asian or Pacific Islander	Rectum	Malignant	Rectum	Rectum	8.3 Other malignant	Unclassified	XId malignant melanomas	5. All Other Cancer Types	Rectum	C20.9-Rectum, NOS	209	8720	Malignant	Unknown	Blank(s)	Blank(s)	Not a paired site	Positive histology	8720/3: Malignant melanoma, NOS	8720/3: Malignant melanoma, NOS	8720-8799: nevi and melanomas	XId Malignant melanomas	Rectum	XI(d) Malignant melanomas	XI(d) Malignant melanomas	Not Brain	Blank(s)	Blank(s)	Colon and Rectum	37 MALIGNANT MELANOMA OF MUCOSA AND EXTRACUTANEOUS	7.1 Melanoma	Localized	Localized	Localized only	Blank(s)	Blank(s)	Blank(s)	Blank(s)	Blank(s)	Blank(s)	Blank(s)	Blank(s)	Blank(s)	Not applicable
55-59 years	Female	2017	White	Non-Spanish-Hispanic-Latino	Non-Hispanic White	Rectum	Malignant	Rectum	Rectum	8.3 Other malignant	Unclassified	XId malignant melanomas	5. All Other Cancer Types	Rectum	C20.9-Rectum, NOS	209	8720	Malignant	Unknown	Blank(s)	Blank(s)	Not a paired site	Positive histology	8720/3: Malignant melanoma, NOS	8720/3: Malignant melanoma, NOS	8720-8799: nevi and melanomas	XId Malignant melanomas	Rectum	XI(d) Malignant melanomas	XI(d) Malignant melanomas	Not Brain	Blank(s)	Blank(s)	Colon and Rectum	37 MALIGNANT MELANOMA OF MUCOSA AND EXTRACUTANEOUS	7.1 Melanoma	Distant	Distant	Distant site(s)/node(s) involved	Blank(s)	Blank(s)	Blank(s)	Blank(s)	Blank(s)	Blank(s)	Blank(s)	Blank(s)	Blank(s)	Not applicable
85+ years	Female	2016	White	Non-Spanish-Hispanic-Latino	Non-Hispanic White	Rectum	Malignant	Rectum	Rectum	8.3 Other malignant	Unclassified	XId malignant melanomas	5. All Other Cancer Types	Rectum	C20.9-Rectum, NOS	209	8720	Malignant	Unknown	Blank(s)	Blank(s)	Not a paired site	Positive histology	8720/3: Malignant melanoma, NOS	8720/3: Malignant melanoma, NOS	8720-8799: nevi and melanomas	XId Malignant melanomas	Rectum	XI(d) Malignant melanomas	XI(d) Malignant melanomas	Not Brain	Blank(s)	Blank(s)	Colon and Rectum	37 MALIGNANT MELANOMA OF MUCOSA AND EXTRACUTANEOUS	7.1 Melanoma	Localized	Localized	Localized only	Blank(s)	Blank(s)	Blank(s)	Blank(s)	Blank(s)	Blank(s)	Blank(s)	Blank(s)	Blank(s)	Not applicable
50-54 years	Female	2008	White	Non-Spanish-Hispanic-Latino	Non-Hispanic White	Rectum	Malignant	Rectum	Rectum	8.3 Other malignant	Unclassified	XId malignant melanomas	5. All Other Cancer Types	Rectum	C20.9-Rectum, NOS	209	8720	Malignant	Unknown	Blank(s)	Blank(s)	Not a paired site	Positive histology	8720/3: Malignant melanoma, NOS	8720/3: Malignant melanoma, NOS	8720-8799: nevi and melanomas	XId Malignant melanomas	Rectum	XI(d) Malignant melanomas	XI(d) Malignant melanomas	Not Brain	Blank(s)	Blank(s)	Blank(s)	37 MALIGNANT MELANOMA OF MUCOSA AND EXTRACUTANEOUS	7.1 Melanoma	Localized	Localized	Localized only	Localized	Blank(s)	Blank(s)	Blank(s)	Blank(s)	Blank(s)	Blank(s)	Blank(s)	Blank(s)	Blank(s)
70-74 years	Male	2001	White	Non-Spanish-Hispanic-Latino	Non-Hispanic White	Rectum	Malignant	Rectum	Rectum	8.3 Other malignant	Unclassified	XId malignant melanomas	5. All Other Cancer Types	Rectum	C20.9-Rectum, NOS	209	8720	Malignant	Unknown	Blank(s)	Blank(s)	Not a paired site	Positive histology	8720/3: Malignant melanoma, NOS	8720/3: Malignant melanoma, NOS	8720-8799: nevi and melanomas	XId Malignant melanomas	Rectum	XI(d) Malignant melanomas	XI(d) Malignant melanomas	Not Brain	Blank(s)	Blank(s)	Blank(s)	37 MALIGNANT MELANOMA OF MUCOSA AND EXTRACUTANEOUS	7.1 Melanoma	Blank(s)	Localized	Blank(s)	Localized	Blank(s)	Blank(s)	Blank(s)	Blank(s)	Blank(s)	Blank(s)	Blank(s)	Blank(s)	Blank(s)
55-59 years	Male	2001	White	Non-Spanish-Hispanic-Latino	Non-Hispanic White	Rectum	Malignant	Rectum	Rectum	8.3 Other malignant	Unclassified	XId malignant melanomas	5. All Other Cancer Types	Rectum	C20.9-Rectum, NOS	209	8720	Malignant	Unknown	Blank(s)	Blank(s)	Not a paired site	Positive histology	8720/3: Malignant melanoma, NOS	8720/3: Malignant melanoma, NOS	8720-8799: nevi and melanomas	XId Malignant melanomas	Rectum	XI(d) Malignant melanomas	XI(d) Malignant melanomas	Not Brain	Blank(s)	Blank(s)	Blank(s)	37 MALIGNANT MELANOMA OF MUCOSA AND EXTRACUTANEOUS	7.1 Melanoma	Blank(s)	Regional	Blank(s)	Regional	Blank(s)	Blank(s)	Blank(s)	Blank(s)	Blank(s)	Blank(s)	Blank(s)	Blank(s)	Blank(s)
75-79 years	Female	2001	White	Non-Spanish-Hispanic-Latino	Non-Hispanic White	Rectum	Malignant	Rectum	Rectum	8.3 Other malignant	Unclassified	XId malignant melanomas	5. All Other Cancer Types	Rectum	C20.9-Rectum, NOS	209	8720	Malignant	Unknown	Blank(s)	Blank(s)	Not a paired site	Positive histology	8720/3: Malignant melanoma, NOS	8720/3: Malignant melanoma, NOS	8720-8799: nevi and melanomas	XId Malignant melanomas	Rectum	XI(d) Malignant melanomas	XI(d) Malignant melanomas	Not Brain	Blank(s)	Blank(s)	Blank(s)	37 MALIGNANT MELANOMA OF MUCOSA AND EXTRACUTANEOUS	7.1 Melanoma	Blank(s)	Distant	Blank(s)	Distant	Blank(s)	Blank(s)	Blank(s)	Blank(s)	Blank(s)	Blank(s)	Blank(s)	Blank(s)	Blank(s)
65-69 years	Female	2002	White	Non-Spanish-Hispanic-Latino	Non-Hispanic White	Rectum	Malignant	Rectum	Rectum	8.3 Other malignant	Unclassified	XId malignant melanomas	5. All Other Cancer Types	Rectum	C20.9-Rectum, NOS	209	8720	Malignant	Unknown	Blank(s)	Blank(s)	Not a paired site	Positive histology	8720/3: Malignant melanoma, NOS	8720/3: Malignant melanoma, NOS	8720-8799: nevi and melanomas	XId Malignant melanomas	Rectum	XI(d) Malignant melanomas	XI(d) Malignant melanomas	Not Brain	Blank(s)	Blank(s)	Blank(s)	37 MALIGNANT MELANOMA OF MUCOSA AND EXTRACUTANEOUS	7.1 Melanoma	Blank(s)	Localized	Blank(s)	Localized	Blank(s)	Blank(s)	Blank(s)	Blank(s)	Blank(s)	Blank(s)	Blank(s)	Blank(s)	Blank(s)
85+ years	Male	2013	White	Non-Spanish-Hispanic-Latino	Non-Hispanic White	Rectum	Malignant	Rectum	Rectum	8.3 Other malignant	Unclassified	XId malignant melanomas	5. All Other Cancer Types	Rectum	C20.9-Rectum, NOS	209	8720	Malignant	Unknown	Blank(s)	Blank(s)	Not a paired site	Positive histology	8720/3: Malignant melanoma, NOS	8720/3: Malignant melanoma, NOS	8720-8799: nevi and melanomas	XId Malignant melanomas	Rectum	XI(d) Malignant melanomas	XI(d) Malignant melanomas	Not Brain	Blank(s)	Blank(s)	Colon and Rectum	37 MALIGNANT MELANOMA OF MUCOSA AND EXTRACUTANEOUS	7.1 Melanoma	Distant	Distant	Distant site(s)/node(s) involved	Distant	Blank(s)	Blank(s)	Blank(s)	Blank(s)	NA	NA	NA	NA	Blank(s)
50-54 years	Male	2005	White	Non-Spanish-Hispanic-Latino	Non-Hispanic White	Rectum	Malignant	Rectum	Rectum	8.2 Nodular melanoma	Unclassified	XId malignant melanomas	5. All Other Cancer Types	Rectum	C20.9-Rectum, NOS	209	8721	Malignant	Unknown	Blank(s)	Blank(s)	Not a paired site	Positive histology	8721/3: Nodular melanoma	8721/3: Nodular melanoma	8720-8799: nevi and melanomas	XId Malignant melanomas	Rectum	XI(d) Malignant melanomas	XI(d) Malignant melanomas	Not Brain	Blank(s)	Blank(s)	Blank(s)	37 MALIGNANT MELANOMA OF MUCOSA AND EXTRACUTANEOUS	7.1 Melanoma	Localized	Localized	Localized only	Localized	Blank(s)	Blank(s)	Blank(s)	Blank(s)	Blank(s)	Blank(s)	Blank(s)	Blank(s)	Blank(s)
55-59 years	Female	2008	White	Non-Spanish-Hispanic-Latino	Non-Hispanic White	Rectum	Malignant	Rectum	Rectum	8.3 Other malignant	Unclassified	XId malignant melanomas	5. All Other Cancer Types	Rectum	C20.9-Rectum, NOS	209	8746	Malignant	Unknown	Blank(s)	Blank(s)	Not a paired site	Positive histology	8746/3: Mucosal lentiginous melanoma	8746/3: Mucosal lentiginous melanoma	8720-8799: nevi and melanomas	XId Malignant melanomas	Rectum	XI(d) Malignant melanomas	XI(d) Malignant melanomas	Not Brain	Blank(s)	Blank(s)	Blank(s)	37 MALIGNANT MELANOMA OF MUCOSA AND EXTRACUTANEOUS	7.1 Melanoma	Unknown/unstaged	Unknown/unstaged	Unknown/unstaged/unspecified/DCO	Unstaged	Blank(s)	Blank(s)	Blank(s)	Blank(s)	Blank(s)	Blank(s)	Blank(s)	Blank(s)	Blank(s)
40-44 years	Female	2010	White	Non-Spanish-Hispanic-Latino	Non-Hispanic White	Rectum	Malignant	Rectum	Rectum	8.2 Nodular melanoma	Unclassified	XId malignant melanomas	5. All Other Cancer Types	Rectum	C20.9-Rectum, NOS	209	8721	Malignant	Unknown	Blank(s)	Blank(s)	Not a paired site	Positive histology	8721/3: Nodular melanoma	8721/3: Nodular melanoma	8720-8799: nevi and melanomas	XId Malignant melanomas	Rectum	XI(d) Malignant melanomas	XI(d) Malignant melanomas	Not Brain	Blank(s)	Blank(s)	Colon and Rectum	37 MALIGNANT MELANOMA OF MUCOSA AND EXTRACUTANEOUS	7.1 Melanoma	Distant	Distant	Distant site(s)/node(s) involved	Distant	Blank(s)	Blank(s)	Blank(s)	Blank(s)	NA	NA	NA	NA	Blank(s)
65-69 years	Male	2012	White	Non-Spanish-Hispanic-Latino	Non-Hispanic White	Rectum	Malignant	Rectum	Rectum	8.2 Nodular melanoma	Unclassified	XId malignant melanomas	5. All Other Cancer Types	Rectum	C20.9-Rectum, NOS	209	8721	Malignant	Unknown	Blank(s)	Blank(s)	Not a paired site	Positive histology	8721/3: Nodular melanoma	8721/3: Nodular melanoma	8720-8799: nevi and melanomas	XId Malignant melanomas	Rectum	XI(d) Malignant melanomas	XI(d) Malignant melanomas	Not Brain	Blank(s)	Blank(s)	Colon and Rectum	37 MALIGNANT MELANOMA OF MUCOSA AND EXTRACUTANEOUS	7.1 Melanoma	Localized	Localized	Localized only	Localized	Blank(s)	Blank(s)	Blank(s)	Blank(s)	NA	NA	NA	NA	Blank(s)
60-64 years	Male	2017	White	Non-Spanish-Hispanic-Latino	Non-Hispanic White	Rectum	Malignant	Rectum	Rectum	8.3 Other malignant	Unclassified	XId malignant melanomas	5. All Other Cancer Types	Rectum	C20.9-Rectum, NOS	209	8720	Malignant	Unknown	Blank(s)	Blank(s)	Not a paired site	Positive histology	8720/3: Malignant melanoma, NOS	8720/3: Malignant melanoma, NOS	8720-8799: nevi and melanomas	XId Malignant melanomas	Rectum	XI(d) Malignant melanomas	XI(d) Malignant melanomas	Not Brain	Blank(s)	Blank(s)	Colon and Rectum	37 MALIGNANT MELANOMA OF MUCOSA AND EXTRACUTANEOUS	7.1 Melanoma	Regional	Regional	Regional lymph nodes involved only	Blank(s)	Blank(s)	Blank(s)	Blank(s)	Blank(s)	Blank(s)	Blank(s)	Blank(s)	Blank(s)	Not applicable
75-79 years	Female	2004	Black	Non-Spanish-Hispanic-Latino	Non-Hispanic Black	Rectum	Malignant	Rectum	Rectum	8.3 Other malignant	Unclassified	XId malignant melanomas	5. All Other Cancer Types	Rectum	C20.9-Rectum, NOS	209	8720	Malignant	Unknown	Blank(s)	Blank(s)	Not a paired site	Positive histology	8720/3: Malignant melanoma, NOS	8720/3: Malignant melanoma, NOS	8720-8799: nevi and melanomas	XId Malignant melanomas	Rectum	XI(d) Malignant melanomas	XI(d) Malignant melanomas	Not Brain	Blank(s)	Blank(s)	Blank(s)	37 MALIGNANT MELANOMA OF MUCOSA AND EXTRACUTANEOUS	7.1 Melanoma	Distant	Distant	Distant site(s)/node(s) involved	Distant	Blank(s)	Blank(s)	Blank(s)	Blank(s)	Blank(s)	Blank(s)	Blank(s)	Blank(s)	Blank(s)
75-79 years	Female	2000	White	Non-Spanish-Hispanic-Latino	Non-Hispanic White	Rectum	Malignant	Rectum	Rectum	8.3 Other malignant	Unclassified	XId malignant melanomas	5. All Other Cancer Types	Rectum	C20.9-Rectum, NOS	209	8720	Malignant	Unknown	Blank(s)	Blank(s)	Not a paired site	Positive histology	8720/3: Malignant melanoma, NOS	8720/3: Malignant melanoma, NOS	8720-8799: nevi and melanomas	XId Malignant melanomas	Rectum	XI(d) Malignant melanomas	XI(d) Malignant melanomas	Not Brain	Blank(s)	Blank(s)	Blank(s)	37 MALIGNANT MELANOMA OF MUCOSA AND EXTRACUTANEOUS	7.1 Melanoma	Blank(s)	Localized	Blank(s)	Localized	Blank(s)	Blank(s)	Blank(s)	Blank(s)	Blank(s)	Blank(s)	Blank(s)	Blank(s)	Blank(s)
65-69 years	Male	2000	White	Non-Spanish-Hispanic-Latino	Non-Hispanic White	Rectum	Malignant	Rectum	Rectum	8.3 Other malignant	Unclassified	XId malignant melanomas	5. All Other Cancer Types	Rectum	C20.9-Rectum, NOS	209	8730	Malignant	Unknown	Blank(s)	Blank(s)	Not a paired site	Positive histology	8730/3: Amelanotic melanoma	8730/3: Amelanotic melanoma	8720-8799: nevi and melanomas	XId Malignant melanomas	Rectum	XI(d) Malignant melanomas	XI(d) Malignant melanomas	Not Brain	Blank(s)	Blank(s)	Blank(s)	37 MALIGNANT MELANOMA OF MUCOSA AND EXTRACUTANEOUS	7.1 Melanoma	Blank(s)	Regional	Blank(s)	Regional	Blank(s)	Blank(s)	Blank(s)	Blank(s)	Blank(s)	Blank(s)	Blank(s)	Blank(s)	Blank(s)
75-79 years	Female	2003	White	Non-Spanish-Hispanic-Latino	Non-Hispanic White	Rectum	Malignant	Rectum	Rectum	8.3 Other malignant	Unclassified	XId malignant melanomas	5. All Other Cancer Types	Rectum	C20.9-Rectum, NOS	209	8720	Malignant	Unknown	Blank(s)	Blank(s)	Not a paired site	Positive histology	8720/3: Malignant melanoma, NOS	8720/3: Malignant melanoma, NOS	8720-8799: nevi and melanomas	XId Malignant melanomas	Rectum	XI(d) Malignant melanomas	XI(d) Malignant melanomas	Not Brain	Blank(s)	Blank(s)	Blank(s)	37 MALIGNANT MELANOMA OF MUCOSA AND EXTRACUTANEOUS	7.1 Melanoma	Blank(s)	Regional	Blank(s)	Regional	Blank(s)	Blank(s)	Blank(s)	Blank(s)	Blank(s)	Blank(s)	Blank(s)	Blank(s)	Blank(s)
65-69 years	Female	2007	White	Non-Spanish-Hispanic-Latino	Non-Hispanic White	Rectum	Malignant	Rectum	Rectum	8.3 Other malignant	Unclassified	XId malignant melanomas	5. All Other Cancer Types	Rectum	C20.9-Rectum, NOS	209	8720	Malignant	Unknown	Blank(s)	Blank(s)	Not a paired site	Positive histology	8720/3: Malignant melanoma, NOS	8720/3: Malignant melanoma, NOS	8720-8799: nevi and melanomas	XId Malignant melanomas	Rectum	XI(d) Malignant melanomas	XI(d) Malignant melanomas	Not Brain	Blank(s)	Blank(s)	Blank(s)	37 MALIGNANT MELANOMA OF MUCOSA AND EXTRACUTANEOUS	7.1 Melanoma	Distant	Distant	Distant site(s)/node(s) involved	Distant	Blank(s)	Blank(s)	Blank(s)	Blank(s)	Blank(s)	Blank(s)	Blank(s)	Blank(s)	Blank(s)
75-79 years	Male	2007	White	Non-Spanish-Hispanic-Latino	Non-Hispanic White	Rectum	Malignant	Rectum	Rectum	8.3 Other malignant	Unclassified	XId malignant melanomas	5. All Other Cancer Types	Rectum	C20.9-Rectum, NOS	209	8720	Malignant	Unknown	Blank(s)	Blank(s)	Not a paired site	Positive histology	8720/3: Malignant melanoma, NOS	8720/3: Malignant melanoma, NOS	8720-8799: nevi and melanomas	XId Malignant melanomas	Rectum	XI(d) Malignant melanomas	XI(d) Malignant melanomas	Not Brain	Blank(s)	Blank(s)	Blank(s)	37 MALIGNANT MELANOMA OF MUCOSA AND EXTRACUTANEOUS	7.1 Melanoma	Distant	Distant	Distant site(s)/node(s) involved	Distant	Blank(s)	Blank(s)	Blank(s)	Blank(s)	Blank(s)	Blank(s)	Blank(s)	Blank(s)	Blank(s)
30-34 years	Female	2009	White	Non-Spanish-Hispanic-Latino	Non-Hispanic White	Rectum	Malignant	Rectum	Rectum	8.3 Other malignant	Unclassified	XId malignant melanomas	5. All Other Cancer Types	Rectum	C20.9-Rectum, NOS	209	8720	Malignant	Unknown	Blank(s)	Blank(s)	Not a paired site	Positive histology	8720/3: Malignant melanoma, NOS	8720/3: Malignant melanoma, NOS	8720-8799: nevi and melanomas	XId Malignant melanomas	Rectum	XI(d) Malignant melanomas	XI(d) Malignant melanomas	Not Brain	Blank(s)	Blank(s)	Blank(s)	37 MALIGNANT MELANOMA OF MUCOSA AND EXTRACUTANEOUS	7.1 Melanoma	Distant	Distant	Distant site(s)/node(s) involved	Distant	Blank(s)	Blank(s)	Blank(s)	Blank(s)	Blank(s)	Blank(s)	Blank(s)	Blank(s)	Blank(s)
50-54 years	Male	2014	White	Non-Spanish-Hispanic-Latino	Non-Hispanic White	Rectum	Malignant	Rectum	Rectum	8.3 Other malignant	Unclassified	XId malignant melanomas	5. All Other Cancer Types	Rectum	C20.9-Rectum, NOS	209	8720	Malignant	Poorly differentiated; Grade III	Blank(s)	Blank(s)	Not a paired site	Positive histology	8720/3: Malignant melanoma, NOS	8720/3: Malignant melanoma, NOS	8720-8799: nevi and melanomas	XId Malignant melanomas	Rectum	XI(d) Malignant melanomas	XI(d) Malignant melanomas	Not Brain	Blank(s)	Blank(s)	Colon and Rectum	37 MALIGNANT MELANOMA OF MUCOSA AND EXTRACUTANEOUS	7.1 Melanoma	Distant	Distant	Distant site(s)/node(s) involved	Distant	Blank(s)	Blank(s)	Blank(s)	Blank(s)	NA	NA	NA	NA	Blank(s)
50-54 years	Male	2015	White	Non-Spanish-Hispanic-Latino	Non-Hispanic White	Rectum	Malignant	Rectum	Rectum	8.3 Other malignant	Unclassified	XId malignant melanomas	5. All Other Cancer Types	Rectum	C20.9-Rectum, NOS	209	8720	Malignant	Unknown	Blank(s)	Blank(s)	Not a paired site	Positive histology	8720/3: Malignant melanoma, NOS	8720/3: Malignant melanoma, NOS	8720-8799: nevi and melanomas	XId Malignant melanomas	Rectum	XI(d) Malignant melanomas	XI(d) Malignant melanomas	Not Brain	Blank(s)	Blank(s)	Colon and Rectum	37 MALIGNANT MELANOMA OF MUCOSA AND EXTRACUTANEOUS	7.1 Melanoma	Localized	Localized	Localized only	Localized	Blank(s)	Blank(s)	Blank(s)	Blank(s)	NA	NA	NA	NA	Blank(s)
80-84 years	Female	2002	White	Non-Spanish-Hispanic-Latino	Non-Hispanic White	Rectum	Malignant	Rectum	Rectum	8.3 Other malignant	Unclassified	XId malignant melanomas	5. All Other Cancer Types	Rectum	C20.9-Rectum, NOS	209	8720	Malignant	Unknown	Blank(s)	Blank(s)	Not a paired site	Positive histology	8720/3: Malignant melanoma, NOS	8720/3: Malignant melanoma, NOS	8720-8799: nevi and melanomas	XId Malignant melanomas	Rectum	XI(d) Malignant melanomas	XI(d) Malignant melanomas	Not Brain	Blank(s)	Blank(s)	Blank(s)	37 MALIGNANT MELANOMA OF MUCOSA AND EXTRACUTANEOUS	7.1 Melanoma	Blank(s)	Localized	Blank(s)	Localized	Blank(s)	Blank(s)	Blank(s)	Blank(s)	Blank(s)	Blank(s)	Blank(s)	Blank(s)	Blank(s)
65-69 years	Male	2005	Asian or Pacific Islander	Non-Spanish-Hispanic-Latino	Non-Hispanic Asian or Pacific Islander	Rectum	Malignant	Rectum	Rectum	8.2 Nodular melanoma	Unclassified	XId malignant melanomas	5. All Other Cancer Types	Rectum	C20.9-Rectum, NOS	209	8721	Malignant	Unknown	Blank(s)	Blank(s)	Not a paired site	Positive histology	8721/3: Nodular melanoma	8721/3: Nodular melanoma	8720-8799: nevi and melanomas	XId Malignant melanomas	Rectum	XI(d) Malignant melanomas	XI(d) Malignant melanomas	Not Brain	Blank(s)	Blank(s)	Blank(s)	37 MALIGNANT MELANOMA OF MUCOSA AND EXTRACUTANEOUS	7.1 Melanoma	Localized	Localized	Localized only	Localized	Blank(s)	Blank(s)	Blank(s)	Blank(s)	Blank(s)	Blank(s)	Blank(s)	Blank(s)	Blank(s)
60-64 years	Female	2006	Asian or Pacific Islander	Spanish-Hispanic-Latino	Hispanic (All Races)	Rectum	Malignant	Rectum	Rectum	8.2 Nodular melanoma	Unclassified	XId malignant melanomas	5. All Other Cancer Types	Rectum	C20.9-Rectum, NOS	209	8721	Malignant	Unknown	Blank(s)	Blank(s)	Not a paired site	Positive histology	8721/3: Nodular melanoma	8721/3: Nodular melanoma	8720-8799: nevi and melanomas	XId Malignant melanomas	Rectum	XI(d) Malignant melanomas	XI(d) Malignant melanomas	Not Brain	Blank(s)	Blank(s)	Blank(s)	37 MALIGNANT MELANOMA OF MUCOSA AND EXTRACUTANEOUS	7.1 Melanoma	Localized	Localized	Localized only	Localized	Blank(s)	Blank(s)	Blank(s)	Blank(s)	Blank(s)	Blank(s)	Blank(s)	Blank(s)	Blank(s)
55-59 years	Male	2006	White	Non-Spanish-Hispanic-Latino	Non-Hispanic White	Rectum	Malignant	Rectum	Rectum	8.3 Other malignant	Unclassified	XId malignant melanomas	5. All Other Cancer Types	Rectum	C20.9-Rectum, NOS	209	8772	Malignant	Undifferentiated; anaplastic; Grade IV	Blank(s)	Blank(s)	Not a paired site	Positive histology	8772/3: Spindle cell melanoma, NOS	8772/3: Spindle cell melanoma, NOS	8720-8799: nevi and melanomas	XId Malignant melanomas	Rectum	XI(d) Malignant melanomas	XI(d) Malignant melanomas	Not Brain	Blank(s)	Blank(s)	Blank(s)	37 MALIGNANT MELANOMA OF MUCOSA AND EXTRACUTANEOUS	7.1 Melanoma	Localized	Localized	Localized only	Localized	Blank(s)	Blank(s)	Blank(s)	Blank(s)	Blank(s)	Blank(s)	Blank(s)	Blank(s)	Blank(s)
50-54 years	Female	2009	Asian or Pacific Islander	Non-Spanish-Hispanic-Latino	Non-Hispanic Asian or Pacific Islander	Rectum	Malignant	Rectum	Rectum	8.3 Other malignant	Unclassified	XId malignant melanomas	5. All Other Cancer Types	Rectum	C20.9-Rectum, NOS	209	8720	Malignant	Poorly differentiated; Grade III	Blank(s)	Blank(s)	Not a paired site	Positive histology	8720/3: Malignant melanoma, NOS	8720/3: Malignant melanoma, NOS	8720-8799: nevi and melanomas	XId Malignant melanomas	Rectum	XI(d) Malignant melanomas	XI(d) Malignant melanomas	Not Brain	Blank(s)	Blank(s)	Blank(s)	37 MALIGNANT MELANOMA OF MUCOSA AND EXTRACUTANEOUS	7.1 Melanoma	Regional	Regional	Regional by both direct extension and lymph node involvement	Regional	Blank(s)	Blank(s)	Blank(s)	Blank(s)	Blank(s)	Blank(s)	Blank(s)	Blank(s)	Blank(s)
50-54 years	Male	2010	Asian or Pacific Islander	Non-Spanish-Hispanic-Latino	Non-Hispanic Asian or Pacific Islander	Rectum	Malignant	Rectum	Rectum	8.3 Other malignant	Unclassified	XId malignant melanomas	5. All Other Cancer Types	Rectum	C20.9-Rectum, NOS	209	8746	Malignant	Unknown	Blank(s)	Blank(s)	Not a paired site	Positive histology	8746/3: Mucosal lentiginous melanoma	8746/3: Mucosal lentiginous melanoma	8720-8799: nevi and melanomas	XId Malignant melanomas	Rectum	XI(d) Malignant melanomas	XI(d) Malignant melanomas	Not Brain	Blank(s)	Blank(s)	Colon and Rectum	37 MALIGNANT MELANOMA OF MUCOSA AND EXTRACUTANEOUS	7.1 Melanoma	Localized	Localized	Localized only	Localized	Blank(s)	Blank(s)	Blank(s)	Blank(s)	NA	NA	NA	NA	Blank(s)
65-69 years	Female	2001	White	Non-Spanish-Hispanic-Latino	Non-Hispanic White	Rectum	Malignant	Rectum	Rectum	8.3 Other malignant	Unclassified	XId malignant melanomas	5. All Other Cancer Types	Rectum	C20.9-Rectum, NOS	209	8720	Malignant	Unknown	Blank(s)	Blank(s)	Not a paired site	Positive histology	8720/3: Malignant melanoma, NOS	8720/3: Malignant melanoma, NOS	8720-8799: nevi and melanomas	XId Malignant melanomas	Rectum	XI(d) Malignant melanomas	XI(d) Malignant melanomas	Not Brain	Blank(s)	Blank(s)	Blank(s)	37 MALIGNANT MELANOMA OF MUCOSA AND EXTRACUTANEOUS	7.1 Melanoma	Blank(s)	Unknown/unstaged	Blank(s)	Unstaged	Blank(s)	Blank(s)	Blank(s)	Blank(s)	Blank(s)	Blank(s)	Blank(s)	Blank(s)	Blank(s)
65-69 years	Female	2000	White	Non-Spanish-Hispanic-Latino	Non-Hispanic White	Rectum	Malignant	Rectum	Rectum	8.3 Other malignant	Unclassified	XId malignant melanomas	5. All Other Cancer Types	Rectum	C20.9-Rectum, NOS	209	8720	Malignant	Unknown	Blank(s)	Blank(s)	Not a paired site	Positive histology	8720/3: Malignant melanoma, NOS	8720/3: Malignant melanoma, NOS	8720-8799: nevi and melanomas	XId Malignant melanomas	Rectum	XI(d) Malignant melanomas	XI(d) Malignant melanomas	Not Brain	Blank(s)	Blank(s)	Blank(s)	37 MALIGNANT MELANOMA OF MUCOSA AND EXTRACUTANEOUS	7.1 Melanoma	Blank(s)	Localized	Blank(s)	Localized	Blank(s)	Blank(s)	Blank(s)	Blank(s)	Blank(s)	Blank(s)	Blank(s)	Blank(s)	Blank(s)
75-79 years	Female	2000	White	Non-Spanish-Hispanic-Latino	Non-Hispanic White	Rectum	Malignant	Rectum	Rectum	8.3 Other malignant	Unclassified	XId malignant melanomas	5. All Other Cancer Types	Rectum	C20.9-Rectum, NOS	209	8720	Malignant	Unknown	Blank(s)	Blank(s)	Not a paired site	Positive histology	8720/3: Malignant melanoma, NOS	8720/3: Malignant melanoma, NOS	8720-8799: nevi and melanomas	XId Malignant melanomas	Rectum	XI(d) Malignant melanomas	XI(d) Malignant melanomas	Not Brain	Blank(s)	Blank(s)	Blank(s)	37 MALIGNANT MELANOMA OF MUCOSA AND EXTRACUTANEOUS	7.1 Melanoma	Blank(s)	Localized	Blank(s)	Localized	Blank(s)	Blank(s)	Blank(s)	Blank(s)	Blank(s)	Blank(s)	Blank(s)	Blank(s)	Blank(s)
65-69 years	Female	2004	White	Non-Spanish-Hispanic-Latino	Non-Hispanic White	Rectum	Malignant	Rectum	Rectum	8.3 Other malignant	Unclassified	XId malignant melanomas	5. All Other Cancer Types	Rectum	C20.9-Rectum, NOS	209	8720	Malignant	Unknown	Blank(s)	Blank(s)	Not a paired site	Positive histology	8720/3: Malignant melanoma, NOS	8720/3: Malignant melanoma, NOS	8720-8799: nevi and melanomas	XId Malignant melanomas	Rectum	XI(d) Malignant melanomas	XI(d) Malignant melanomas	Not Brain	Blank(s)	Blank(s)	Blank(s)	37 MALIGNANT MELANOMA OF MUCOSA AND EXTRACUTANEOUS	7.1 Melanoma	Localized	Localized	Localized only	Localized	Blank(s)	Blank(s)	Blank(s)	Blank(s)	Blank(s)	Blank(s)	Blank(s)	Blank(s)	Blank(s)
75-79 years	Female	2010	White	Non-Spanish-Hispanic-Latino	Non-Hispanic White	Rectum	Malignant	Rectum	Rectum	8.3 Other malignant	Unclassified	XId malignant melanomas	5. All Other Cancer Types	Rectum	C20.9-Rectum, NOS	209	8720	Malignant	Unknown	Blank(s)	Blank(s)	Not a paired site	Positive histology	8720/3: Malignant melanoma, NOS	8720/3: Malignant melanoma, NOS	8720-8799: nevi and melanomas	XId Malignant melanomas	Rectum	XI(d) Malignant melanomas	XI(d) Malignant melanomas	Not Brain	Blank(s)	Blank(s)	Colon and Rectum	37 MALIGNANT MELANOMA OF MUCOSA AND EXTRACUTANEOUS	7.1 Melanoma	Localized	Localized	Localized only	Localized	Blank(s)	Blank(s)	Blank(s)	Blank(s)	NA	NA	NA	NA	Blank(s)
40-44 years	Male	2016	White	Non-Spanish-Hispanic-Latino	Non-Hispanic White	Rectum	Malignant	Rectum	Rectum	8.3 Other malignant	Unclassified	XId malignant melanomas	5. All Other Cancer Types	Rectum	C20.9-Rectum, NOS	209	8720	Malignant	Unknown	Blank(s)	Blank(s)	Not a paired site	Positive histology	8720/3: Malignant melanoma, NOS	8720/3: Malignant melanoma, NOS	8720-8799: nevi and melanomas	XId Malignant melanomas	Rectum	XI(d) Malignant melanomas	XI(d) Malignant melanomas	Not Brain	Blank(s)	Blank(s)	Colon and Rectum	37 MALIGNANT MELANOMA OF MUCOSA AND EXTRACUTANEOUS	7.1 Melanoma	Localized	Localized	Localized only	Blank(s)	Blank(s)	Blank(s)	Blank(s)	Blank(s)	Blank(s)	Blank(s)	Blank(s)	Blank(s)	Not applicable
50-54 years	Female	2004	White	Non-Spanish-Hispanic-Latino	Non-Hispanic White	Rectum	Malignant	Rectum	Rectum	8.3 Other malignant	Unclassified	XId malignant melanomas	5. All Other Cancer Types	Rectum	C20.9-Rectum, NOS	209	8720	Malignant	Unknown	Blank(s)	Blank(s)	Not a paired site	Positive histology	8720/3: Malignant melanoma, NOS	8720/3: Malignant melanoma, NOS	8720-8799: nevi and melanomas	XId Malignant melanomas	Rectum	XI(d) Malignant melanomas	XI(d) Malignant melanomas	Not Brain	Blank(s)	Blank(s)	Blank(s)	37 MALIGNANT MELANOMA OF MUCOSA AND EXTRACUTANEOUS	7.1 Melanoma	Distant	Distant	Distant site(s)/node(s) involved	Distant	Blank(s)	Blank(s)	Blank(s)	Blank(s)	Blank(s)	Blank(s)	Blank(s)	Blank(s)	Blank(s)
55-59 years	Female	2004	White	Non-Spanish-Hispanic-Latino	Non-Hispanic White	Rectum	Malignant	Rectum	Rectum	8.3 Other malignant	Unclassified	XId malignant melanomas	5. All Other Cancer Types	Rectum	C20.9-Rectum, NOS	209	8720	Malignant	Unknown	Blank(s)	Blank(s)	Not a paired site	Positive histology	8720/3: Malignant melanoma, NOS	8720/3: Malignant melanoma, NOS	8720-8799: nevi and melanomas	XId Malignant melanomas	Rectum	XI(d) Malignant melanomas	XI(d) Malignant melanomas	Not Brain	Blank(s)	Blank(s)	Blank(s)	37 MALIGNANT MELANOMA OF MUCOSA AND EXTRACUTANEOUS	7.1 Melanoma	Distant	Distant	Distant site(s)/node(s) involved	Distant	Blank(s)	Blank(s)	Blank(s)	Blank(s)	Blank(s)	Blank(s)	Blank(s)	Blank(s)	Blank(s)
80-84 years	Female	2006	White	Non-Spanish-Hispanic-Latino	Non-Hispanic White	Rectum	Malignant	Rectum	Rectum	8.3 Other malignant	Unclassified	XId malignant melanomas	5. All Other Cancer Types	Rectum	C20.9-Rectum, NOS	209	8720	Malignant	Unknown	Blank(s)	Blank(s)	Not a paired site	Positive histology	8720/3: Malignant melanoma, NOS	8720/3: Malignant melanoma, NOS	8720-8799: nevi and melanomas	XId Malignant melanomas	Rectum	XI(d) Malignant melanomas	XI(d) Malignant melanomas	Not Brain	Blank(s)	Blank(s)	Blank(s)	37 MALIGNANT MELANOMA OF MUCOSA AND EXTRACUTANEOUS	7.1 Melanoma	Localized	Localized	Localized only	Localized	Blank(s)	Blank(s)	Blank(s)	Blank(s)	Blank(s)	Blank(s)	Blank(s)	Blank(s)	Blank(s)
80-84 years	Female	2009	White	Spanish-Hispanic-Latino	Hispanic (All Races)	Rectum	Malignant	Rectum	Rectum	8.3 Other malignant	Unclassified	XId malignant melanomas	5. All Other Cancer Types	Rectum	C20.9-Rectum, NOS	209	8720	Malignant	Unknown	Blank(s)	Blank(s)	Not a paired site	Positive histology	8720/3: Malignant melanoma, NOS	8720/3: Malignant melanoma, NOS	8720-8799: nevi and melanomas	XId Malignant melanomas	Rectum	XI(d) Malignant melanomas	XI(d) Malignant melanomas	Not Brain	Blank(s)	Blank(s)	Blank(s)	37 MALIGNANT MELANOMA OF MUCOSA AND EXTRACUTANEOUS	7.1 Melanoma	Localized	Localized	Localized only	Localized	Blank(s)	Blank(s)	Blank(s)	Blank(s)	Blank(s)	Blank(s)	Blank(s)	Blank(s)	Blank(s)
75-79 years	Male	2010	White	Spanish-Hispanic-Latino	Hispanic (All Races)	Rectum	Malignant	Rectum	Rectum	8.3 Other malignant	Unclassified	XId malignant melanomas	5. All Other Cancer Types	Rectum	C20.9-Rectum, NOS	209	8720	Malignant	Unknown	Blank(s)	Blank(s)	Not a paired site	Positive histology	8720/3: Malignant melanoma, NOS	8720/3: Malignant melanoma, NOS	8720-8799: nevi and melanomas	XId Malignant melanomas	Rectum	XI(d) Malignant melanomas	XI(d) Malignant melanomas	Not Brain	Blank(s)	Blank(s)	Colon and Rectum	37 MALIGNANT MELANOMA OF MUCOSA AND EXTRACUTANEOUS	7.1 Melanoma	Regional	Regional	Regional lymph nodes involved only	Regional	Blank(s)	Blank(s)	Blank(s)	Blank(s)	NA	NA	NA	NA	Blank(s)
50-54 years	Female	2016	White	Spanish-Hispanic-Latino	Hispanic (All Races)	Rectum	Malignant	Rectum	Rectum	8.3 Other malignant	Unclassified	XId malignant melanomas	5. All Other Cancer Types	Rectum	C20.9-Rectum, NOS	209	8720	Malignant	Unknown	Blank(s)	Blank(s)	Not a paired site	Positive histology	8720/3: Malignant melanoma, NOS	8720/3: Malignant melanoma, NOS	8720-8799: nevi and melanomas	XId Malignant melanomas	Rectum	XI(d) Malignant melanomas	XI(d) Malignant melanomas	Not Brain	Blank(s)	Blank(s)	Colon and Rectum	37 MALIGNANT MELANOMA OF MUCOSA AND EXTRACUTANEOUS	7.1 Melanoma	Regional	Regional	Regional by direct extension only	Blank(s)	Blank(s)	Blank(s)	Blank(s)	Blank(s)	Blank(s)	Blank(s)	Blank(s)	Blank(s)	Not applicable
75-79 years	Male	2001	White	Non-Spanish-Hispanic-Latino	Non-Hispanic White	Rectum	Malignant	Rectum	Rectum	8.3 Other malignant	Unclassified	XId malignant melanomas	5. All Other Cancer Types	Rectum	C20.9-Rectum, NOS	209	8720	Malignant	Unknown	Blank(s)	Blank(s)	Not a paired site	Positive histology	8720/3: Malignant melanoma, NOS	8720/3: Malignant melanoma, NOS	8720-8799: nevi and melanomas	XId Malignant melanomas	Rectum	XI(d) Malignant melanomas	XI(d) Malignant melanomas	Not Brain	Blank(s)	Blank(s)	Blank(s)	37 MALIGNANT MELANOMA OF MUCOSA AND EXTRACUTANEOUS	7.1 Melanoma	Blank(s)	Localized	Blank(s)	Localized	Blank(s)	Blank(s)	Blank(s)	Blank(s)	Blank(s)	Blank(s)	Blank(s)	Blank(s)	Blank(s)
65-69 years	Female	2017	White	Non-Spanish-Hispanic-Latino	Non-Hispanic White	Rectum	Malignant	Rectum	Rectum	8.3 Other malignant	Unclassified	XId malignant melanomas	5. All Other Cancer Types	Rectum	C20.9-Rectum, NOS	209	8720	Malignant	Unknown	Blank(s)	Blank(s)	Not a paired site	Positive histology	8720/3: Malignant melanoma, NOS	8720/3: Malignant melanoma, NOS	8720-8799: nevi and melanomas	XId Malignant melanomas	Rectum	XI(d) Malignant melanomas	XI(d) Malignant melanomas	Not Brain	Blank(s)	Blank(s)	Colon and Rectum	37 MALIGNANT MELANOMA OF MUCOSA AND EXTRACUTANEOUS	7.1 Melanoma	Localized	Localized	Localized only	Blank(s)	Blank(s)	Blank(s)	Blank(s)	Blank(s)	Blank(s)	Blank(s)	Blank(s)	Blank(s)	Not applicable
55-59 years	Female	2002	White	Non-Spanish-Hispanic-Latino	Non-Hispanic White	Rectum	Malignant	Rectum	Rectum	8.3 Other malignant	Unclassified	XId malignant melanomas	5. All Other Cancer Types	Rectum	C20.9-Rectum, NOS	209	8720	Malignant	Unknown	Blank(s)	Blank(s)	Not a paired site	Positive histology	8720/3: Malignant melanoma, NOS	8720/3: Malignant melanoma, NOS	8720-8799: nevi and melanomas	XId Malignant melanomas	Rectum	XI(d) Malignant melanomas	XI(d) Malignant melanomas	Not Brain	Blank(s)	Blank(s)	Blank(s)	37 MALIGNANT MELANOMA OF MUCOSA AND EXTRACUTANEOUS	7.1 Melanoma	Blank(s)	Regional	Blank(s)	Regional	Blank(s)	Blank(s)	Blank(s)	Blank(s)	Blank(s)	Blank(s)	Blank(s)	Blank(s)	Blank(s)
75-79 years	Female	2004	White	Non-Spanish-Hispanic-Latino	Non-Hispanic White	Rectum	Malignant	Rectum	Rectum	8.3 Other malignant	Unclassified	XId malignant melanomas	5. All Other Cancer Types	Rectum	C20.9-Rectum, NOS	209	8720	Malignant	Unknown	Blank(s)	Blank(s)	Not a paired site	Positive histology	8720/3: Malignant melanoma, NOS	8720/3: Malignant melanoma, NOS	8720-8799: nevi and melanomas	XId Malignant melanomas	Rectum	XI(d) Malignant melanomas	XI(d) Malignant melanomas	Not Brain	Blank(s)	Blank(s)	Blank(s)	37 MALIGNANT MELANOMA OF MUCOSA AND EXTRACUTANEOUS	7.1 Melanoma	Localized	Localized	Localized only	Localized	Blank(s)	Blank(s)	Blank(s)	Blank(s)	Blank(s)	Blank(s)	Blank(s)	Blank(s)	Blank(s)
50-54 years	Male	2011	White	Non-Spanish-Hispanic-Latino	Non-Hispanic White	Rectum	Malignant	Rectum	Rectum	8.3 Other malignant	Unclassified	XId malignant melanomas	5. All Other Cancer Types	Rectum	C20.9-Rectum, NOS	209	8720	Malignant	Unknown	Blank(s)	Blank(s)	Not a paired site	Positive histology	8720/3: Malignant melanoma, NOS	8720/3: Malignant melanoma, NOS	8720-8799: nevi and melanomas	XId Malignant melanomas	Rectum	XI(d) Malignant melanomas	XI(d) Malignant melanomas	Not Brain	Blank(s)	Blank(s)	Colon and Rectum	37 MALIGNANT MELANOMA OF MUCOSA AND EXTRACUTANEOUS	7.1 Melanoma	Localized	Localized	Localized only	Localized	Blank(s)	Blank(s)	Blank(s)	Blank(s)	NA	NA	NA	NA	Blank(s)
55-59 years	Male	2015	White	Non-Spanish-Hispanic-Latino	Non-Hispanic White	Rectum	Malignant	Rectum	Rectum	8.3 Other malignant	Unclassified	XId malignant melanomas	5. All Other Cancer Types	Rectum	C20.9-Rectum, NOS	209	8720	Malignant	Unknown	Blank(s)	Blank(s)	Not a paired site	Positive histology	8720/3: Malignant melanoma, NOS	8720/3: Malignant melanoma, NOS	8720-8799: nevi and melanomas	XId Malignant melanomas	Rectum	XI(d) Malignant melanomas	XI(d) Malignant melanomas	Not Brain	Blank(s)	Blank(s)	Colon and Rectum	37 MALIGNANT MELANOMA OF MUCOSA AND EXTRACUTANEOUS	7.1 Melanoma	Localized	Localized	Localized only	Localized	Blank(s)	Blank(s)	Blank(s)	Blank(s)	NA	NA	NA	NA	Blank(s)
65-69 years	Male	2015	White	Non-Spanish-Hispanic-Latino	Non-Hispanic White	Rectum	Malignant	Rectum	Rectum	8.3 Other malignant	Unclassified	XId malignant melanomas	5. All Other Cancer Types	Rectum	C20.9-Rectum, NOS	209	8720	Malignant	Unknown	Blank(s)	Blank(s)	Not a paired site	Positive histology	8720/3: Malignant melanoma, NOS	8720/3: Malignant melanoma, NOS	8720-8799: nevi and melanomas	XId Malignant melanomas	Rectum	XI(d) Malignant melanomas	XI(d) Malignant melanomas	Not Brain	Blank(s)	Blank(s)	Colon and Rectum	37 MALIGNANT MELANOMA OF MUCOSA AND EXTRACUTANEOUS	7.1 Melanoma	Localized	Localized	Localized only	Localized	Blank(s)	Blank(s)	Blank(s)	Blank(s)	NA	NA	NA	NA	Blank(s)
55-59 years	Female	2001	White	Non-Spanish-Hispanic-Latino	Non-Hispanic White	Rectum	Malignant	Rectum	Rectum	8.3 Other malignant	Unclassified	XId malignant melanomas	5. All Other Cancer Types	Rectum	C20.9-Rectum, NOS	209	8720	Malignant	Unknown	Blank(s)	Blank(s)	Not a paired site	Positive histology	8720/3: Malignant melanoma, NOS	8720/3: Malignant melanoma, NOS	8720-8799: nevi and melanomas	XId Malignant melanomas	Rectum	XI(d) Malignant melanomas	XI(d) Malignant melanomas	Not Brain	Blank(s)	Blank(s)	Blank(s)	37 MALIGNANT MELANOMA OF MUCOSA AND EXTRACUTANEOUS	7.1 Melanoma	Blank(s)	Localized	Blank(s)	Localized	Blank(s)	Blank(s)	Blank(s)	Blank(s)	Blank(s)	Blank(s)	Blank(s)	Blank(s)	Blank(s)
50-54 years	Female	2007	White	Non-Spanish-Hispanic-Latino	Non-Hispanic White	Rectum	Malignant	Rectum	Rectum	8.3 Other malignant	Unclassified	XId malignant melanomas	5. All Other Cancer Types	Rectum	C20.9-Rectum, NOS	209	8720	Malignant	Unknown	Blank(s)	Blank(s)	Not a paired site	Positive histology	8720/3: Malignant melanoma, NOS	8720/3: Malignant melanoma, NOS	8720-8799: nevi and melanomas	XId Malignant melanomas	Rectum	XI(d) Malignant melanomas	XI(d) Malignant melanomas	Not Brain	Blank(s)	Blank(s)	Blank(s)	37 MALIGNANT MELANOMA OF MUCOSA AND EXTRACUTANEOUS	7.1 Melanoma	Localized	Localized	Localized only	Localized	Blank(s)	Blank(s)	Blank(s)	Blank(s)	Blank(s)	Blank(s)	Blank(s)	Blank(s)	Blank(s)
75-79 years	Female	2007	White	Non-Spanish-Hispanic-Latino	Non-Hispanic White	Rectum	Malignant	Rectum	Rectum	8.3 Other malignant	Unclassified	XId malignant melanomas	5. All Other Cancer Types	Rectum	C20.9-Rectum, NOS	209	8720	Malignant	Unknown	Blank(s)	Blank(s)	Not a paired site	Positive histology	8720/3: Malignant melanoma, NOS	8720/3: Malignant melanoma, NOS	8720-8799: nevi and melanomas	XId Malignant melanomas	Rectum	XI(d) Malignant melanomas	XI(d) Malignant melanomas	Not Brain	Blank(s)	Blank(s)	Blank(s)	37 MALIGNANT MELANOMA OF MUCOSA AND EXTRACUTANEOUS	7.1 Melanoma	Localized	Localized	Localized only	Localized	Blank(s)	Blank(s)	Blank(s)	Blank(s)	Blank(s)	Blank(s)	Blank(s)	Blank(s)	Blank(s)
65-69 years	Male	2007	White	Non-Spanish-Hispanic-Latino	Non-Hispanic White	Rectum	Malignant	Rectum	Rectum	8.3 Other malignant	Unclassified	XId malignant melanomas	5. All Other Cancer Types	Rectum	C20.9-Rectum, NOS	209	8720	Malignant	Poorly differentiated; Grade III	Blank(s)	Blank(s)	Not a paired site	Positive histology	8720/3: Malignant melanoma, NOS	8720/3: Malignant melanoma, NOS	8720-8799: nevi and melanomas	XId Malignant melanomas	Rectum	XI(d) Malignant melanomas	XI(d) Malignant melanomas	Not Brain	Blank(s)	Blank(s)	Blank(s)	37 MALIGNANT MELANOMA OF MUCOSA AND EXTRACUTANEOUS	7.1 Melanoma	Distant	Distant	Distant site(s)/node(s) involved	Distant	Blank(s)	Blank(s)	Blank(s)	Blank(s)	Blank(s)	Blank(s)	Blank(s)	Blank(s)	Blank(s)
70-74 years	Female	2008	White	Non-Spanish-Hispanic-Latino	Non-Hispanic White	Rectum	Malignant	Rectum	Rectum	8.3 Other malignant	Unclassified	XId malignant melanomas	5. All Other Cancer Types	Rectum	C20.9-Rectum, NOS	209	8720	Malignant	Unknown	Blank(s)	Blank(s)	Not a paired site	Positive histology	8720/3: Malignant melanoma, NOS	8720/3: Malignant melanoma, NOS	8720-8799: nevi and melanomas	XId Malignant melanomas	Rectum	XI(d) Malignant melanomas	XI(d) Malignant melanomas	Not Brain	Blank(s)	Blank(s)	Blank(s)	37 MALIGNANT MELANOMA OF MUCOSA AND EXTRACUTANEOUS	7.1 Melanoma	Localized	Localized	Localized only	Localized	Blank(s)	Blank(s)	Blank(s)	Blank(s)	Blank(s)	Blank(s)	Blank(s)	Blank(s)	Blank(s)
40-44 years	Female	2011	White	Non-Spanish-Hispanic-Latino	Non-Hispanic White	Rectum	Malignant	Rectum	Rectum	8.3 Other malignant	Unclassified	XId malignant melanomas	5. All Other Cancer Types	Rectum	C20.9-Rectum, NOS	209	8720	Malignant	Unknown	Blank(s)	Blank(s)	Not a paired site	Positive histology	8720/3: Malignant melanoma, NOS	8720/3: Malignant melanoma, NOS	8720-8799: nevi and melanomas	XId Malignant melanomas	Rectum	XI(d) Malignant melanomas	XI(d) Malignant melanomas	Not Brain	Blank(s)	Blank(s)	Colon and Rectum	37 MALIGNANT MELANOMA OF MUCOSA AND EXTRACUTANEOUS	7.1 Melanoma	Distant	Distant	Distant site(s)/node(s) involved	Distant	Blank(s)	Blank(s)	Blank(s)	Blank(s)	NA	NA	NA	NA	Blank(s)
85+ years	Male	2014	White	Spanish-Hispanic-Latino	Hispanic (All Races)	Rectum	Malignant	Rectum	Rectum	8.3 Other malignant	Unclassified	XId malignant melanomas	5. All Other Cancer Types	Rectum	C20.9-Rectum, NOS	209	8720	Malignant	Unknown	Blank(s)	Blank(s)	Not a paired site	Positive histology	8720/3: Malignant melanoma, NOS	8720/3: Malignant melanoma, NOS	8720-8799: nevi and melanomas	XId Malignant melanomas	Rectum	XI(d) Malignant melanomas	XI(d) Malignant melanomas	Not Brain	Blank(s)	Blank(s)	Colon and Rectum	37 MALIGNANT MELANOMA OF MUCOSA AND EXTRACUTANEOUS	7.1 Melanoma	Distant	Distant	Distant site(s)/node(s) involved	Distant	Blank(s)	Blank(s)	Blank(s)	Blank(s)	NA	NA	NA	NA	Blank(s)
70-74 years	Male	2017	Black	Non-Spanish-Hispanic-Latino	Non-Hispanic Black	Rectum	Malignant	Rectum	Rectum	8.3 Other malignant	Unclassified	XId malignant melanomas	5. All Other Cancer Types	Rectum	C20.9-Rectum, NOS	209	8720	Malignant	Unknown	Blank(s)	Blank(s)	Not a paired site	Positive histology	8720/3: Malignant melanoma, NOS	8720/3: Malignant melanoma, NOS	8720-8799: nevi and melanomas	XId Malignant melanomas	Rectum	XI(d) Malignant melanomas	XI(d) Malignant melanomas	Not Brain	Blank(s)	Blank(s)	Colon and Rectum	37 MALIGNANT MELANOMA OF MUCOSA AND EXTRACUTANEOUS	7.1 Melanoma	Localized	Localized	Localized only	Blank(s)	Blank(s)	Blank(s)	Blank(s)	Blank(s)	Blank(s)	Blank(s)	Blank(s)	Blank(s)	Not applicable
45-49 years	Female	2017	Asian or Pacific Islander	Non-Spanish-Hispanic-Latino	Non-Hispanic Asian or Pacific Islander	Rectum	Malignant	Rectum	Rectum	8.3 Other malignant	Unclassified	XId malignant melanomas	5. All Other Cancer Types	Rectum	C20.9-Rectum, NOS	209	8720	Malignant	Unknown	Blank(s)	Blank(s)	Not a paired site	Positive histology	8720/3: Malignant melanoma, NOS	8720/3: Malignant melanoma, NOS	8720-8799: nevi and melanomas	XId Malignant melanomas	Rectum	XI(d) Malignant melanomas	XI(d) Malignant melanomas	Not Brain	Blank(s)	Blank(s)	Colon and Rectum	37 MALIGNANT MELANOMA OF MUCOSA AND EXTRACUTANEOUS	7.1 Melanoma	Localized	Localized	Localized only	Blank(s)	Blank(s)	Blank(s)	Blank(s)	Blank(s)	Blank(s)	Blank(s)	Blank(s)	Blank(s)	Not applicable
80-84 years	Female	2004	White	Spanish-Hispanic-Latino	Hispanic (All Races)	Rectum	Malignant	Rectum	Rectum	8.3 Other malignant	Unclassified	XId malignant melanomas	5. All Other Cancer Types	Rectum	C20.9-Rectum, NOS	209	8720	Malignant	Unknown	Blank(s)	Blank(s)	Not a paired site	Positive histology	8720/3: Malignant melanoma, NOS	8720/3: Malignant melanoma, NOS	8720-8799: nevi and melanomas	XId Malignant melanomas	Rectum	XI(d) Malignant melanomas	XI(d) Malignant melanomas	Not Brain	Blank(s)	Blank(s)	Blank(s)	37 MALIGNANT MELANOMA OF MUCOSA AND EXTRACUTANEOUS	7.1 Melanoma	Distant	Distant	Distant site(s)/node(s) involved	Distant	Blank(s)	Blank(s)	Blank(s)	Blank(s)	Blank(s)	Blank(s)	Blank(s)	Blank(s)	Blank(s)
55-59 years	Female	2007	Asian or Pacific Islander	Non-Spanish-Hispanic-Latino	Non-Hispanic Asian or Pacific Islander	Rectum	Malignant	Rectum	Rectum	8.3 Other malignant	Unclassified	XId malignant melanomas	5. All Other Cancer Types	Rectum	C20.9-Rectum, NOS	209	8720	Malignant	Unknown	Blank(s)	Blank(s)	Not a paired site	Positive histology	8720/3: Malignant melanoma, NOS	8720/3: Malignant melanoma, NOS	8720-8799: nevi and melanomas	XId Malignant melanomas	Rectum	XI(d) Malignant melanomas	XI(d) Malignant melanomas	Not Brain	Blank(s)	Blank(s)	Blank(s)	37 MALIGNANT MELANOMA OF MUCOSA AND EXTRACUTANEOUS	7.1 Melanoma	Regional	Regional	Regional lymph nodes involved only	Regional	Blank(s)	Blank(s)	Blank(s)	Blank(s)	Blank(s)	Blank(s)	Blank(s)	Blank(s)	Blank(s)
75-79 years	Female	2012	Asian or Pacific Islander	Non-Spanish-Hispanic-Latino	Non-Hispanic Asian or Pacific Islander	Rectum	Malignant	Rectum	Rectum	8.3 Other malignant	Unclassified	XId malignant melanomas	5. All Other Cancer Types	Rectum	C20.9-Rectum, NOS	209	8720	Malignant	Unknown	Blank(s)	Blank(s)	Not a paired site	Positive histology	8720/3: Malignant melanoma, NOS	8720/3: Malignant melanoma, NOS	8720-8799: nevi and melanomas	XId Malignant melanomas	Rectum	XI(d) Malignant melanomas	XI(d) Malignant melanomas	Not Brain	Blank(s)	Blank(s)	Colon and Rectum	37 MALIGNANT MELANOMA OF MUCOSA AND EXTRACUTANEOUS	7.1 Melanoma	Distant	Distant	Distant site(s)/node(s) involved	Distant	Blank(s)	Blank(s)	Blank(s)	Blank(s)	NA	NA	NA	NA	Blank(s)
60-64 years	Female	2017	White	Non-Spanish-Hispanic-Latino	Non-Hispanic White	Rectum	Malignant	Rectum	Rectum	8.3 Other malignant	Unclassified	XId malignant melanomas	5. All Other Cancer Types	Rectum	C20.9-Rectum, NOS	209	8720	Malignant	Unknown	Blank(s)	Blank(s)	Not a paired site	Positive histology	8720/3: Malignant melanoma, NOS	8720/3: Malignant melanoma, NOS	8720-8799: nevi and melanomas	XId Malignant melanomas	Rectum	XI(d) Malignant melanomas	XI(d) Malignant melanomas	Not Brain	Blank(s)	Blank(s)	Colon and Rectum	37 MALIGNANT MELANOMA OF MUCOSA AND EXTRACUTANEOUS	7.1 Melanoma	Distant	Distant	Distant site(s)/node(s) involved	Blank(s)	Blank(s)	Blank(s)	Blank(s)	Blank(s)	Blank(s)	Blank(s)	Blank(s)	Blank(s)	Not applicable
80-84 years	Male	2001	White	Spanish-Hispanic-Latino	Hispanic (All Races)	Rectum	Malignant	Rectum	Rectum	8.3 Other malignant	Unclassified	XId malignant melanomas	5. All Other Cancer Types	Rectum	C20.9-Rectum, NOS	209	8720	Malignant	Unknown	Blank(s)	Blank(s)	Not a paired site	Positive histology	8720/3: Malignant melanoma, NOS	8720/3: Malignant melanoma, NOS	8720-8799: nevi and melanomas	XId Malignant melanomas	Rectum	XI(d) Malignant melanomas	XI(d) Malignant melanomas	Not Brain	Blank(s)	Blank(s)	Blank(s)	37 MALIGNANT MELANOMA OF MUCOSA AND EXTRACUTANEOUS	7.1 Melanoma	Blank(s)	Localized	Blank(s)	Localized	Blank(s)	Blank(s)	Blank(s)	Blank(s)	Blank(s)	Blank(s)	Blank(s)	Blank(s)	Blank(s)
70-74 years	Female	2001	White	Non-Spanish-Hispanic-Latino	Non-Hispanic White	Rectum	Malignant	Rectum	Rectum	8.3 Other malignant	Unclassified	XId malignant melanomas	5. All Other Cancer Types	Rectum	C20.9-Rectum, NOS	209	8720	Malignant	Undifferentiated; anaplastic; Grade IV	Blank(s)	Blank(s)	Not a paired site	Positive histology	8720/3: Malignant melanoma, NOS	8720/3: Malignant melanoma, NOS	8720-8799: nevi and melanomas	XId Malignant melanomas	Rectum	XI(d) Malignant melanomas	XI(d) Malignant melanomas	Not Brain	Blank(s)	Blank(s)	Blank(s)	37 MALIGNANT MELANOMA OF MUCOSA AND EXTRACUTANEOUS	7.1 Melanoma	Blank(s)	Localized	Blank(s)	Localized	Blank(s)	Blank(s)	Blank(s)	Blank(s)	Blank(s)	Blank(s)	Blank(s)	Blank(s)	Blank(s)
75-79 years	Male	2000	White	Spanish-Hispanic-Latino	Hispanic (All Races)	Rectum	Malignant	Rectum	Rectum	8.3 Other malignant	Unclassified	XId malignant melanomas	5. All Other Cancer Types	Rectum	C20.9-Rectum, NOS	209	8720	Malignant	Unknown	Blank(s)	Blank(s)	Not a paired site	Positive histology	8720/3: Malignant melanoma, NOS	8720/3: Malignant melanoma, NOS	8720-8799: nevi and melanomas	XId Malignant melanomas	Rectum	XI(d) Malignant melanomas	XI(d) Malignant melanomas	Not Brain	Blank(s)	Blank(s)	Blank(s)	37 MALIGNANT MELANOMA OF MUCOSA AND EXTRACUTANEOUS	7.1 Melanoma	Blank(s)	Regional	Blank(s)	Regional	Blank(s)	Blank(s)	Blank(s)	Blank(s)	Blank(s)	Blank(s)	Blank(s)	Blank(s)	Blank(s)
65-69 years	Female	2002	White	Non-Spanish-Hispanic-Latino	Non-Hispanic White	Rectum	Malignant	Rectum	Rectum	8.3 Other malignant	Unclassified	XId malignant melanomas	5. All Other Cancer Types	Rectum	C20.9-Rectum, NOS	209	8720	Malignant	Unknown	Blank(s)	Blank(s)	Not a paired site	Positive histology	8720/3: Malignant melanoma, NOS	8720/3: Malignant melanoma, NOS	8720-8799: nevi and melanomas	XId Malignant melanomas	Rectum	XI(d) Malignant melanomas	XI(d) Malignant melanomas	Not Brain	Blank(s)	Blank(s)	Blank(s)	37 MALIGNANT MELANOMA OF MUCOSA AND EXTRACUTANEOUS	7.1 Melanoma	Blank(s)	Distant	Blank(s)	Distant	Blank(s)	Blank(s)	Blank(s)	Blank(s)	Blank(s)	Blank(s)	Blank(s)	Blank(s)	Blank(s)
75-79 years	Female	2002	White	Spanish-Hispanic-Latino	Hispanic (All Races)	Rectum	Malignant	Rectum	Rectum	8.3 Other malignant	Unclassified	XId malignant melanomas	5. All Other Cancer Types	Rectum	C20.9-Rectum, NOS	209	8730	Malignant	Unknown	Blank(s)	Blank(s)	Not a paired site	Positive histology	8730/3: Amelanotic melanoma	8730/3: Amelanotic melanoma	8720-8799: nevi and melanomas	XId Malignant melanomas	Rectum	XI(d) Malignant melanomas	XI(d) Malignant melanomas	Not Brain	Blank(s)	Blank(s)	Blank(s)	37 MALIGNANT MELANOMA OF MUCOSA AND EXTRACUTANEOUS	7.1 Melanoma	Blank(s)	Regional	Blank(s)	Regional	Blank(s)	Blank(s)	Blank(s)	Blank(s)	Blank(s)	Blank(s)	Blank(s)	Blank(s)	Blank(s)
80-84 years	Female	2003	White	Non-Spanish-Hispanic-Latino	Non-Hispanic White	Rectum	Malignant	Rectum	Rectum	8.3 Other malignant	Unclassified	XId malignant melanomas	5. All Other Cancer Types	Rectum	C20.9-Rectum, NOS	209	8720	Malignant	Unknown	Blank(s)	Blank(s)	Not a paired site	Positive histology	8720/3: Malignant melanoma, NOS	8720/3: Malignant melanoma, NOS	8720-8799: nevi and melanomas	XId Malignant melanomas	Rectum	XI(d) Malignant melanomas	XI(d) Malignant melanomas	Not Brain	Blank(s)	Blank(s)	Blank(s)	37 MALIGNANT MELANOMA OF MUCOSA AND EXTRACUTANEOUS	7.1 Melanoma	Blank(s)	Regional	Blank(s)	Localized	Blank(s)	Blank(s)	Blank(s)	Blank(s)	Blank(s)	Blank(s)	Blank(s)	Blank(s)	Blank(s)
65-69 years	Female	2003	White	Spanish-Hispanic-Latino	Hispanic (All Races)	Rectum	Malignant	Rectum	Rectum	8.3 Other malignant	Unclassified	XId malignant melanomas	5. All Other Cancer Types	Rectum	C20.9-Rectum, NOS	209	8720	Malignant	Unknown	Blank(s)	Blank(s)	Not a paired site	Positive histology	8720/3: Malignant melanoma, NOS	8720/3: Malignant melanoma, NOS	8720-8799: nevi and melanomas	XId Malignant melanomas	Rectum	XI(d) Malignant melanomas	XI(d) Malignant melanomas	Not Brain	Blank(s)	Blank(s)	Blank(s)	37 MALIGNANT MELANOMA OF MUCOSA AND EXTRACUTANEOUS	7.1 Melanoma	Blank(s)	Distant	Blank(s)	Distant	Blank(s)	Blank(s)	Blank(s)	Blank(s)	Blank(s)	Blank(s)	Blank(s)	Blank(s)	Blank(s)
75-79 years	Female	2003	White	Non-Spanish-Hispanic-Latino	Non-Hispanic White	Rectum	Malignant	Rectum	Rectum	8.3 Other malignant	Unclassified	XId malignant melanomas	5. All Other Cancer Types	Rectum	C20.9-Rectum, NOS	209	8720	Malignant	Unknown	Blank(s)	Blank(s)	Not a paired site	Positive histology	8720/3: Malignant melanoma, NOS	8720/3: Malignant melanoma, NOS	8720-8799: nevi and melanomas	XId Malignant melanomas	Rectum	XI(d) Malignant melanomas	XI(d) Malignant melanomas	Not Brain	Blank(s)	Blank(s)	Blank(s)	37 MALIGNANT MELANOMA OF MUCOSA AND EXTRACUTANEOUS	7.1 Melanoma	Blank(s)	Regional	Blank(s)	Regional	Blank(s)	Blank(s)	Blank(s)	Blank(s)	Blank(s)	Blank(s)	Blank(s)	Blank(s)	Blank(s)
70-74 years	Male	2004	Black	Non-Spanish-Hispanic-Latino	Non-Hispanic Black	Rectum	Malignant	Rectum	Rectum	8.3 Other malignant	Unclassified	XId malignant melanomas	5. All Other Cancer Types	Rectum	C20.9-Rectum, NOS	209	8720	Malignant	Unknown	Blank(s)	Blank(s)	Not a paired site	Positive histology	8720/3: Malignant melanoma, NOS	8720/3: Malignant melanoma, NOS	8720-8799: nevi and melanomas	XId Malignant melanomas	Rectum	XI(d) Malignant melanomas	XI(d) Malignant melanomas	Not Brain	Blank(s)	Blank(s)	Blank(s)	37 MALIGNANT MELANOMA OF MUCOSA AND EXTRACUTANEOUS	7.1 Melanoma	Distant	Distant	Distant site(s)/node(s) involved	Distant	Blank(s)	Blank(s)	Blank(s)	Blank(s)	Blank(s)	Blank(s)	Blank(s)	Blank(s)	Blank(s)
60-64 years	Female	2005	Asian or Pacific Islander	Non-Spanish-Hispanic-Latino	Non-Hispanic Asian or Pacific Islander	Rectum	Malignant	Rectum	Rectum	8.3 Other malignant	Unclassified	XId malignant melanomas	5. All Other Cancer Types	Rectum	C20.9-Rectum, NOS	209	8720	Malignant	Unknown	Blank(s)	Blank(s)	Not a paired site	Positive histology	8720/3: Malignant melanoma, NOS	8720/3: Malignant melanoma, NOS	8720-8799: nevi and melanomas	XId Malignant melanomas	Rectum	XI(d) Malignant melanomas	XI(d) Malignant melanomas	Not Brain	Blank(s)	Blank(s)	Blank(s)	37 MALIGNANT MELANOMA OF MUCOSA AND EXTRACUTANEOUS	7.1 Melanoma	Distant	Distant	Distant site(s)/node(s) involved	Distant	Blank(s)	Blank(s)	Blank(s)	Blank(s)	Blank(s)	Blank(s)	Blank(s)	Blank(s)	Blank(s)
55-59 years	Male	2007	Black	Non-Spanish-Hispanic-Latino	Non-Hispanic Black	Rectum	Malignant	Rectum	Rectum	8.3 Other malignant	Unclassified	XId malignant melanomas	5. All Other Cancer Types	Rectum	C20.9-Rectum, NOS	209	8720	Malignant	Unknown	Blank(s)	Blank(s)	Not a paired site	Positive histology	8720/3: Malignant melanoma, NOS	8720/3: Malignant melanoma, NOS	8720-8799: nevi and melanomas	XId Malignant melanomas	Rectum	XI(d) Malignant melanomas	XI(d) Malignant melanomas	Not Brain	Blank(s)	Blank(s)	Blank(s)	37 MALIGNANT MELANOMA OF MUCOSA AND EXTRACUTANEOUS	7.1 Melanoma	Regional	Regional	Regional by both direct extension and lymph node involvement	Regional	Blank(s)	Blank(s)	Blank(s)	Blank(s)	Blank(s)	Blank(s)	Blank(s)	Blank(s)	Blank(s)
65-69 years	Female	2007	White	Spanish-Hispanic-Latino	Hispanic (All Races)	Rectum	Malignant	Rectum	Rectum	8.3 Other malignant	Unclassified	XId malignant melanomas	5. All Other Cancer Types	Rectum	C20.9-Rectum, NOS	209	8720	Malignant	Unknown	Blank(s)	Blank(s)	Not a paired site	Positive histology	8720/3: Malignant melanoma, NOS	8720/3: Malignant melanoma, NOS	8720-8799: nevi and melanomas	XId Malignant melanomas	Rectum	XI(d) Malignant melanomas	XI(d) Malignant melanomas	Not Brain	Blank(s)	Blank(s)	Blank(s)	37 MALIGNANT MELANOMA OF MUCOSA AND EXTRACUTANEOUS	7.1 Melanoma	Unknown/unstaged	Unknown/unstaged	Unknown/unstaged/unspecified/DCO	Unstaged	Blank(s)	Blank(s)	Blank(s)	Blank(s)	Blank(s)	Blank(s)	Blank(s)	Blank(s)	Blank(s)
25-29 years	Male	2008	White	Non-Spanish-Hispanic-Latino	Non-Hispanic White	Rectum	Malignant	Rectum	Rectum	8.3 Other malignant	Unclassified	XId malignant melanomas	5. All Other Cancer Types	Rectum	C20.9-Rectum, NOS	209	8722	Malignant	Unknown	Blank(s)	Blank(s)	Not a paired site	Positive histology	8722/3: Balloon cell melanoma	8722/3: Balloon cell melanoma	8720-8799: nevi and melanomas	XId Malignant melanomas	Rectum	XI(d) Malignant melanomas	XI(d) Malignant melanomas	Not Brain	Blank(s)	Blank(s)	Blank(s)	37 MALIGNANT MELANOMA OF MUCOSA AND EXTRACUTANEOUS	7.1 Melanoma	Regional	Regional	Regional lymph nodes involved only	Regional	Blank(s)	Blank(s)	Blank(s)	Blank(s)	Blank(s)	Blank(s)	Blank(s)	Blank(s)	Blank(s)
85+ years	Female	2013	White	Non-Spanish-Hispanic-Latino	Non-Hispanic White	Rectum	Malignant	Rectum	Rectum	8.3 Other malignant	Unclassified	XId malignant melanomas	5. All Other Cancer Types	Rectum	C20.9-Rectum, NOS	209	8720	Malignant	Unknown	Blank(s)	Blank(s)	Not a paired site	Positive histology	8720/3: Malignant melanoma, NOS	8720/3: Malignant melanoma, NOS	8720-8799: nevi and melanomas	XId Malignant melanomas	Rectum	XI(d) Malignant melanomas	XI(d) Malignant melanomas	Not Brain	Blank(s)	Blank(s)	Colon and Rectum	37 MALIGNANT MELANOMA OF MUCOSA AND EXTRACUTANEOUS	7.1 Melanoma	Regional	Regional	Regional lymph nodes involved only	Regional	Blank(s)	Blank(s)	Blank(s)	Blank(s)	NA	NA	NA	NA	Blank(s)
75-79 years	Female	2016	White	Non-Spanish-Hispanic-Latino	Non-Hispanic White	Rectum	Malignant	Rectum	Rectum	8.3 Other malignant	Unclassified	XId malignant melanomas	5. All Other Cancer Types	Rectum	C20.9-Rectum, NOS	209	8720	Malignant	Unknown	Blank(s)	Blank(s)	Not a paired site	Positive histology	8720/3: Malignant melanoma, NOS	8720/3: Malignant melanoma, NOS	8720-8799: nevi and melanomas	XId Malignant melanomas	Rectum	XI(d) Malignant melanomas	XI(d) Malignant melanomas	Not Brain	Blank(s)	Blank(s)	Colon and Rectum	37 MALIGNANT MELANOMA OF MUCOSA AND EXTRACUTANEOUS	7.1 Melanoma	Regional	Regional	Regional lymph nodes involved only	Blank(s)	Blank(s)	Blank(s)	Blank(s)	Blank(s)	Blank(s)	Blank(s)	Blank(s)	Blank(s)	Not applicable
55-59 years	Female	2011	Asian or Pacific Islander	Non-Spanish-Hispanic-Latino	Non-Hispanic Asian or Pacific Islander	Rectum	Malignant	Rectum	Rectum	8.3 Other malignant	Unclassified	XId malignant melanomas	5. All Other Cancer Types	Rectum	C20.9-Rectum, NOS	209	8772	Malignant	Unknown	Blank(s)	Blank(s)	Not a paired site	Positive histology	8772/3: Spindle cell melanoma, NOS	8772/3: Spindle cell melanoma, NOS	8720-8799: nevi and melanomas	XId Malignant melanomas	Rectum	XI(d) Malignant melanomas	XI(d) Malignant melanomas	Not Brain	Blank(s)	Blank(s)	Colon and Rectum	37 MALIGNANT MELANOMA OF MUCOSA AND EXTRACUTANEOUS	7.1 Melanoma	Unknown/unstaged	Unknown/unstaged	Unknown/unstaged/unspecified/DCO	Unstaged	Blank(s)	Blank(s)	Blank(s)	Blank(s)	NA	NA	NA	NA	Blank(s)
45-49 years	Male	2012	White	Non-Spanish-Hispanic-Latino	Non-Hispanic White	Rectum	Malignant	Rectum	Rectum	8.3 Other malignant	Unclassified	XId malignant melanomas	5. All Other Cancer Types	Rectum	C20.9-Rectum, NOS	209	8772	Malignant	Unknown	Blank(s)	Blank(s)	Not a paired site	Positive histology	8772/3: Spindle cell melanoma, NOS	8772/3: Spindle cell melanoma, NOS	8720-8799: nevi and melanomas	XId Malignant melanomas	Rectum	XI(d) Malignant melanomas	XI(d) Malignant melanomas	Not Brain	Blank(s)	Blank(s)	Colon and Rectum	37 MALIGNANT MELANOMA OF MUCOSA AND EXTRACUTANEOUS	7.1 Melanoma	Unknown/unstaged	Unknown/unstaged	Unknown/unstaged/unspecified/DCO	Unstaged	Blank(s)	Blank(s)	Blank(s)	Blank(s)	NA	NA	NA	NA	Blank(s)
85+ years	Female	2013	Asian or Pacific Islander	Non-Spanish-Hispanic-Latino	Non-Hispanic Asian or Pacific Islander	Rectum	Malignant	Rectum	Rectum	8.3 Other malignant	Unclassified	XId malignant melanomas	5. All Other Cancer Types	Rectum	C20.9-Rectum, NOS	209	8720	Malignant	Unknown	Blank(s)	Blank(s)	Not a paired site	Positive histology	8720/3: Malignant melanoma, NOS	8720/3: Malignant melanoma, NOS	8720-8799: nevi and melanomas	XId Malignant melanomas	Rectum	XI(d) Malignant melanomas	XI(d) Malignant melanomas	Not Brain	Blank(s)	Blank(s)	Colon and Rectum	37 MALIGNANT MELANOMA OF MUCOSA AND EXTRACUTANEOUS	7.1 Melanoma	Regional	Regional	Regional by direct extension only	Regional	Blank(s)	Blank(s)	Blank(s)	Blank(s)	NA	NA	NA	NA	Blank(s)
80-84 years	Female	2012	White	Spanish-Hispanic-Latino	Hispanic (All Races)	Rectum	Malignant	Rectum	Rectum	8.3 Other malignant	Unclassified	XId malignant melanomas	5. All Other Cancer Types	Rectum	C20.9-Rectum, NOS	209	8720	Malignant	Unknown	Blank(s)	Blank(s)	Not a paired site	Unknown	8720/3: Malignant melanoma, NOS	8720/3: Malignant melanoma, NOS	8720-8799: nevi and melanomas	XId Malignant melanomas	Rectum	XI(d) Malignant melanomas	XI(d) Malignant melanomas	Not Brain	Blank(s)	Blank(s)	Colon and Rectum	37 MALIGNANT MELANOMA OF MUCOSA AND EXTRACUTANEOUS	7.1 Melanoma	Unknown/unstaged	Unknown/unstaged	Unknown/unstaged/unspecified/DCO	Unstaged	Blank(s)	Blank(s)	Blank(s)	Blank(s)	NA	NA	NA	NA	Blank(s)
55-59 years	Male	2016	White	Non-Spanish-Hispanic-Latino	Non-Hispanic White	Rectum	Malignant	Rectum	Rectum	8.3 Other malignant	Unclassified	XId malignant melanomas	5. All Other Cancer Types	Rectum	C20.9-Rectum, NOS	209	8720	Malignant	Unknown	Blank(s)	Blank(s)	Not a paired site	Positive histology	8720/3: Malignant melanoma, NOS	8720/3: Malignant melanoma, NOS	8720-8799: nevi and melanomas	XId Malignant melanomas	Rectum	XI(d) Malignant melanomas	XI(d) Malignant melanomas	Not Brain	Blank(s)	Blank(s)	Colon and Rectum	37 MALIGNANT MELANOMA OF MUCOSA AND EXTRACUTANEOUS	7.1 Melanoma	Localized	Localized	Localized only	Blank(s)	Blank(s)	Blank(s)	Blank(s)	Blank(s)	Blank(s)	Blank(s)	Blank(s)	Blank(s)	Not applicable
65-69 years	Female	2016	White	Non-Spanish-Hispanic-Latino	Non-Hispanic White	Rectum	Malignant	Rectum	Rectum	8.3 Other malignant	Unclassified	XId malignant melanomas	5. All Other Cancer Types	Rectum	C20.9-Rectum, NOS	209	8720	Malignant	Unknown	Blank(s)	Blank(s)	Not a paired site	Positive histology	8720/3: Malignant melanoma, NOS	8720/3: Malignant melanoma, NOS	8720-8799: nevi and melanomas	XId Malignant melanomas	Rectum	XI(d) Malignant melanomas	XI(d) Malignant melanomas	Not Brain	Blank(s)	Blank(s)	Colon and Rectum	37 MALIGNANT MELANOMA OF MUCOSA AND EXTRACUTANEOUS	7.1 Melanoma	Unknown/unstaged	Unknown/unstaged	Unknown/unstaged/unspecified/DCO	Blank(s)	Blank(s)	Blank(s)	Blank(s)	Blank(s)	Blank(s)	Blank(s)	Blank(s)	Blank(s)	Not applicable
25-29 years	Female	2017	White	Non-Spanish-Hispanic-Latino	Non-Hispanic White	Rectum	Malignant	Rectum	Rectum	8.3 Other malignant	Unclassified	XId malignant melanomas	5. All Other Cancer Types	Rectum	C20.9-Rectum, NOS	209	8720	Malignant	Unknown	Blank(s)	Blank(s)	Not a paired site	Positive histology	8720/3: Malignant melanoma, NOS	8720/3: Malignant melanoma, NOS	8720-8799: nevi and melanomas	XId Malignant melanomas	Rectum	XI(d) Malignant melanomas	XI(d) Malignant melanomas	Not Brain	Blank(s)	Blank(s)	Colon and Rectum	37 MALIGNANT MELANOMA OF MUCOSA AND EXTRACUTANEOUS	7.1 Melanoma	Localized	Localized	Localized only	Blank(s)	Blank(s)	Blank(s)	Blank(s)	Blank(s)	Blank(s)	Blank(s)	Blank(s)	Blank(s)	Not applicable
55-59 years	Male	2017	Black	Non-Spanish-Hispanic-Latino	Non-Hispanic Black	Rectum	Malignant	Rectum	Rectum	8.3 Other malignant	Unclassified	XId malignant melanomas	5. All Other Cancer Types	Rectum	C20.9-Rectum, NOS	209	8720	Malignant	Unknown	Blank(s)	Blank(s)	Not a paired site	Positive histology	8720/3: Malignant melanoma, NOS	8720/3: Malignant melanoma, NOS	8720-8799: nevi and melanomas	XId Malignant melanomas	Rectum	XI(d) Malignant melanomas	XI(d) Malignant melanomas	Not Brain	Blank(s)	Blank(s)	Colon and Rectum	37 MALIGNANT MELANOMA OF MUCOSA AND EXTRACUTANEOUS	7.1 Melanoma	Localized	Localized	Localized only	Blank(s)	Blank(s)	Blank(s)	Blank(s)	Blank(s)	Blank(s)	Blank(s)	Blank(s)	Blank(s)	Not applicable
35-39 years	Male	2000	White	Spanish-Hispanic-Latino	Hispanic (All Races)	Rectum	Malignant	Rectum	Rectum	8.3 Other malignant	Unclassified	XId malignant melanomas	5. All Other Cancer Types	Rectum	C20.9-Rectum, NOS	209	8720	Malignant	Unknown	Blank(s)	Blank(s)	Not a paired site	Positive histology	8720/3: Malignant melanoma, NOS	8720/3: Malignant melanoma, NOS	8720-8799: nevi and melanomas	XId Malignant melanomas	Rectum	XI(d) Malignant melanomas	XI(d) Malignant melanomas	Not Brain	Blank(s)	Blank(s)	Blank(s)	37 MALIGNANT MELANOMA OF MUCOSA AND EXTRACUTANEOUS	7.1 Melanoma	Blank(s)	Distant	Blank(s)	Distant	Blank(s)	Blank(s)	Blank(s)	Blank(s)	Blank(s)	Blank(s)	Blank(s)	Blank(s)	Blank(s)
60-64 years	Female	2003	White	Non-Spanish-Hispanic-Latino	Non-Hispanic White	Rectum	Malignant	Rectum	Rectum	8.3 Other malignant	Unclassified	XId malignant melanomas	5. All Other Cancer Types	Rectum	C20.9-Rectum, NOS	209	8720	Malignant	Poorly differentiated; Grade III	Blank(s)	Blank(s)	Not a paired site	Positive histology	8720/3: Malignant melanoma, NOS	8720/3: Malignant melanoma, NOS	8720-8799: nevi and melanomas	XId Malignant melanomas	Rectum	XI(d) Malignant melanomas	XI(d) Malignant melanomas	Not Brain	Blank(s)	Blank(s)	Blank(s)	37 MALIGNANT MELANOMA OF MUCOSA AND EXTRACUTANEOUS	7.1 Melanoma	Blank(s)	Unknown/unstaged	Blank(s)	Unstaged	Blank(s)	Blank(s)	Blank(s)	Blank(s)	Blank(s)	Blank(s)	Blank(s)	Blank(s)	Blank(s)
50-54 years	Male	2005	White	Non-Spanish-Hispanic-Latino	Non-Hispanic White	Rectum	Malignant	Rectum	Rectum	8.3 Other malignant	Unclassified	XId malignant melanomas	5. All Other Cancer Types	Rectum	C20.9-Rectum, NOS	209	8761	Malignant	Unknown	Blank(s)	Blank(s)	Not a paired site	Positive histology	8761/3: Malignant melanoma in giant pigmented nevus	8761/3: Malignant melanoma in giant pigmented nevus	8720-8799: nevi and melanomas	XId Malignant melanomas	Rectum	XI(d) Malignant melanomas	XI(d) Malignant melanomas	Not Brain	Blank(s)	Blank(s)	Blank(s)	37 MALIGNANT MELANOMA OF MUCOSA AND EXTRACUTANEOUS	7.1 Melanoma	Localized	Localized	Localized only	Localized	Blank(s)	Blank(s)	Blank(s)	Blank(s)	Blank(s)	Blank(s)	Blank(s)	Blank(s)	Blank(s)
45-49 years	Female	2000	White	Non-Spanish-Hispanic-Latino	Non-Hispanic White	Rectum	Malignant	Rectum	Rectum	8.3 Other malignant	Unclassified	XId malignant melanomas	5. All Other Cancer Types	Rectum	C20.9-Rectum, NOS	209	8720	Malignant	Unknown	Blank(s)	Blank(s)	Not a paired site	Positive histology	8720/3: Malignant melanoma, NOS	8720/3: Malignant melanoma, NOS	8720-8799: nevi and melanomas	XId Malignant melanomas	Rectum	XI(d) Malignant melanomas	XI(d) Malignant melanomas	Not Brain	Blank(s)	Blank(s)	Blank(s)	37 MALIGNANT MELANOMA OF MUCOSA AND EXTRACUTANEOUS	7.1 Melanoma	Blank(s)	Localized	Blank(s)	Localized	Blank(s)	Blank(s)	Blank(s)	Blank(s)	Blank(s)	Blank(s)	Blank(s)	Blank(s)	Blank(s)
85+ years	Female	2002	White	Non-Spanish-Hispanic-Latino	Non-Hispanic White	Rectum	Malignant	Rectum	Rectum	8.3 Other malignant	Unclassified	XId malignant melanomas	5. All Other Cancer Types	Rectum	C20.9-Rectum, NOS	209	8720	Malignant	Unknown	Blank(s)	Blank(s)	Not a paired site	Positive histology	8720/3: Malignant melanoma, NOS	8720/3: Malignant melanoma, NOS	8720-8799: nevi and melanomas	XId Malignant melanomas	Rectum	XI(d) Malignant melanomas	XI(d) Malignant melanomas	Not Brain	Blank(s)	Blank(s)	Blank(s)	37 MALIGNANT MELANOMA OF MUCOSA AND EXTRACUTANEOUS	7.1 Melanoma	Blank(s)	Localized	Blank(s)	Localized	Blank(s)	Blank(s)	Blank(s)	Blank(s)	Blank(s)	Blank(s)	Blank(s)	Blank(s)	Blank(s)
75-79 years	Female	2012	White	Non-Spanish-Hispanic-Latino	Non-Hispanic White	Rectum	Malignant	Rectum	Rectum	8.3 Other malignant	Unclassified	XId malignant melanomas	5. All Other Cancer Types	Rectum	C20.9-Rectum, NOS	209	8720	Malignant	Unknown	Blank(s)	Blank(s)	Not a paired site	Positive histology	8720/3: Malignant melanoma, NOS	8720/3: Malignant melanoma, NOS	8720-8799: nevi and melanomas	XId Malignant melanomas	Rectum	XI(d) Malignant melanomas	XI(d) Malignant melanomas	Not Brain	Blank(s)	Blank(s)	Colon and Rectum	37 MALIGNANT MELANOMA OF MUCOSA AND EXTRACUTANEOUS	7.1 Melanoma	Unknown/unstaged	Unknown/unstaged	Unknown/unstaged/unspecified/DCO	Unstaged	Blank(s)	Blank(s)	Blank(s)	Blank(s)	NA	NA	NA	NA	Blank(s)
70-74 years	Female	2004	White	Spanish-Hispanic-Latino	Hispanic (All Races)	Rectum	Malignant	Rectum	Rectum	8.3 Other malignant	Unclassified	XId malignant melanomas	5. All Other Cancer Types	Rectum	C20.9-Rectum, NOS	209	8720	Malignant	Unknown	Blank(s)	Blank(s)	Not a paired site	Positive histology	8720/3: Malignant melanoma, NOS	8720/3: Malignant melanoma, NOS	8720-8799: nevi and melanomas	XId Malignant melanomas	Rectum	XI(d) Malignant melanomas	XI(d) Malignant melanomas	Not Brain	Blank(s)	Blank(s)	Blank(s)	37 MALIGNANT MELANOMA OF MUCOSA AND EXTRACUTANEOUS	7.1 Melanoma	Localized	Localized	Localized only	Localized	Blank(s)	Blank(s)	Blank(s)	Blank(s)	Blank(s)	Blank(s)	Blank(s)	Blank(s)	Blank(s)
55-59 years	Female	2001	White	Non-Spanish-Hispanic-Latino	Non-Hispanic White	Rectum	Malignant	Rectum	Rectum	8.3 Other malignant	Unclassified	XId malignant melanomas	5. All Other Cancer Types	Rectum	C20.9-Rectum, NOS	209	8720	Malignant	Unknown	Blank(s)	Blank(s)	Not a paired site	Positive histology	8720/3: Malignant melanoma, NOS	8720/3: Malignant melanoma, NOS	8720-8799: nevi and melanomas	XId Malignant melanomas	Rectum	XI(d) Malignant melanomas	XI(d) Malignant melanomas	Not Brain	Blank(s)	Blank(s)	Blank(s)	37 MALIGNANT MELANOMA OF MUCOSA AND EXTRACUTANEOUS	7.1 Melanoma	Blank(s)	Localized	Blank(s)	Localized	Blank(s)	Blank(s)	Blank(s)	Blank(s)	Blank(s)	Blank(s)	Blank(s)	Blank(s)	Blank(s)
75-79 years	Male	2002	Asian or Pacific Islander	Non-Spanish-Hispanic-Latino	Non-Hispanic Asian or Pacific Islander	Rectum	Malignant	Rectum	Rectum	8.3 Other malignant	Unclassified	XId malignant melanomas	5. All Other Cancer Types	Rectum	C20.9-Rectum, NOS	209	8720	Malignant	Unknown	Blank(s)	Blank(s)	Not a paired site	Positive histology	8720/3: Malignant melanoma, NOS	8720/3: Malignant melanoma, NOS	8720-8799: nevi and melanomas	XId Malignant melanomas	Rectum	XI(d) Malignant melanomas	XI(d) Malignant melanomas	Not Brain	Blank(s)	Blank(s)	Blank(s)	37 MALIGNANT MELANOMA OF MUCOSA AND EXTRACUTANEOUS	7.1 Melanoma	Blank(s)	Distant	Blank(s)	Distant	Blank(s)	Blank(s)	Blank(s)	Blank(s)	Blank(s)	Blank(s)	Blank(s)	Blank(s)	Blank(s)
75-79 years	Male	2000	White	Non-Spanish-Hispanic-Latino	Non-Hispanic White	Rectum	Malignant	Rectum	Rectum	8.3 Other malignant	Unclassified	XId malignant melanomas	5. All Other Cancer Types	Rectum	C20.9-Rectum, NOS	209	8720	Malignant	Unknown	Blank(s)	Blank(s)	Not a paired site	Positive histology	8720/3: Malignant melanoma, NOS	8720/3: Malignant melanoma, NOS	8720-8799: nevi and melanomas	XId Malignant melanomas	Rectum	XI(d) Malignant melanomas	XI(d) Malignant melanomas	Not Brain	Blank(s)	Blank(s)	Blank(s)	37 MALIGNANT MELANOMA OF MUCOSA AND EXTRACUTANEOUS	7.1 Melanoma	Blank(s)	Distant	Blank(s)	Distant	Blank(s)	Blank(s)	Blank(s)	Blank(s)	Blank(s)	Blank(s)	Blank(s)	Blank(s)	Blank(s)
55-59 years	Male	2000	White	Non-Spanish-Hispanic-Latino	Non-Hispanic White	Rectum	Malignant	Rectum	Rectum	8.3 Other malignant	Unclassified	XId malignant melanomas	5. All Other Cancer Types	Rectum	C20.9-Rectum, NOS	209	8720	Malignant	Undifferentiated; anaplastic; Grade IV	Blank(s)	Blank(s)	Not a paired site	Positive histology	8720/3: Malignant melanoma, NOS	8720/3: Malignant melanoma, NOS	8720-8799: nevi and melanomas	XId Malignant melanomas	Rectum	XI(d) Malignant melanomas	XI(d) Malignant melanomas	Not Brain	Blank(s)	Blank(s)	Blank(s)	37 MALIGNANT MELANOMA OF MUCOSA AND EXTRACUTANEOUS	7.1 Melanoma	Blank(s)	Localized	Blank(s)	Localized	Blank(s)	Blank(s)	Blank(s)	Blank(s)	Blank(s)	Blank(s)	Blank(s)	Blank(s)	Blank(s)
65-69 years	Male	2000	White	Non-Spanish-Hispanic-Latino	Non-Hispanic White	Rectum	Malignant	Rectum	Rectum	8.3 Other malignant	Unclassified	XId malignant melanomas	5. All Other Cancer Types	Rectum	C20.9-Rectum, NOS	209	8720	Malignant	Unknown	Blank(s)	Blank(s)	Not a paired site	Positive histology	8720/3: Malignant melanoma, NOS	8720/3: Malignant melanoma, NOS	8720-8799: nevi and melanomas	XId Malignant melanomas	Rectum	XI(d) Malignant melanomas	XI(d) Malignant melanomas	Not Brain	Blank(s)	Blank(s)	Blank(s)	37 MALIGNANT MELANOMA OF MUCOSA AND EXTRACUTANEOUS	7.1 Melanoma	Blank(s)	Unknown/unstaged	Blank(s)	Unstaged	Blank(s)	Blank(s)	Blank(s)	Blank(s)	Blank(s)	Blank(s)	Blank(s)	Blank(s)	Blank(s)
45-49 years	Male	2000	White	Non-Spanish-Hispanic-Latino	Non-Hispanic White	Rectum	Malignant	Rectum	Rectum	8.3 Other malignant	Unclassified	XId malignant melanomas	5. All Other Cancer Types	Rectum	C20.9-Rectum, NOS	209	8720	Malignant	Unknown	Blank(s)	Blank(s)	Not a paired site	Positive histology	8720/3: Malignant melanoma, NOS	8720/3: Malignant melanoma, NOS	8720-8799: nevi and melanomas	XId Malignant melanomas	Rectum	XI(d) Malignant melanomas	XI(d) Malignant melanomas	Not Brain	Blank(s)	Blank(s)	Blank(s)	37 MALIGNANT MELANOMA OF MUCOSA AND EXTRACUTANEOUS	7.1 Melanoma	Blank(s)	Localized	Blank(s)	Localized	Blank(s)	Blank(s)	Blank(s)	Blank(s)	Blank(s)	Blank(s)	Blank(s)	Blank(s)	Blank(s)
70-74 years	Female	2001	White	Non-Spanish-Hispanic-Latino	Non-Hispanic White	Rectum	Malignant	Rectum	Rectum	8.3 Other malignant	Unclassified	XId malignant melanomas	5. All Other Cancer Types	Rectum	C20.9-Rectum, NOS	209	8720	Malignant	Unknown	Blank(s)	Blank(s)	Not a paired site	Positive histology	8720/3: Malignant melanoma, NOS	8720/3: Malignant melanoma, NOS	8720-8799: nevi and melanomas	XId Malignant melanomas	Rectum	XI(d) Malignant melanomas	XI(d) Malignant melanomas	Not Brain	Blank(s)	Blank(s)	Blank(s)	37 MALIGNANT MELANOMA OF MUCOSA AND EXTRACUTANEOUS	7.1 Melanoma	Blank(s)	Distant	Blank(s)	Distant	Blank(s)	Blank(s)	Blank(s)	Blank(s)	Blank(s)	Blank(s)	Blank(s)	Blank(s)	Blank(s)
55-59 years	Male	2002	White	Non-Spanish-Hispanic-Latino	Non-Hispanic White	Rectum	Malignant	Rectum	Rectum	8.3 Other malignant	Unclassified	XId malignant melanomas	5. All Other Cancer Types	Rectum	C20.9-Rectum, NOS	209	8720	Malignant	Unknown	Blank(s)	Blank(s)	Not a paired site	Positive histology	8720/3: Malignant melanoma, NOS	8720/3: Malignant melanoma, NOS	8720-8799: nevi and melanomas	XId Malignant melanomas	Rectum	XI(d) Malignant melanomas	XI(d) Malignant melanomas	Not Brain	Blank(s)	Blank(s)	Blank(s)	37 MALIGNANT MELANOMA OF MUCOSA AND EXTRACUTANEOUS	7.1 Melanoma	Blank(s)	Localized	Blank(s)	Localized	Blank(s)	Blank(s)	Blank(s)	Blank(s)	Blank(s)	Blank(s)	Blank(s)	Blank(s)	Blank(s)
50-54 years	Male	2002	White	Spanish-Hispanic-Latino	Hispanic (All Races)	Rectum	Malignant	Rectum	Rectum	8.3 Other malignant	Unclassified	XId malignant melanomas	5. All Other Cancer Types	Rectum	C20.9-Rectum, NOS	209	8720	Malignant	Unknown	Blank(s)	Blank(s)	Not a paired site	Positive histology	8720/3: Malignant melanoma, NOS	8720/3: Malignant melanoma, NOS	8720-8799: nevi and melanomas	XId Malignant melanomas	Rectum	XI(d) Malignant melanomas	XI(d) Malignant melanomas	Not Brain	Blank(s)	Blank(s)	Blank(s)	37 MALIGNANT MELANOMA OF MUCOSA AND EXTRACUTANEOUS	7.1 Melanoma	Blank(s)	Localized	Blank(s)	Localized	Blank(s)	Blank(s)	Blank(s)	Blank(s)	Blank(s)	Blank(s)	Blank(s)	Blank(s)	Blank(s)
85+ years	Male	2001	White	Non-Spanish-Hispanic-Latino	Non-Hispanic White	Rectum	Malignant	Rectum	Rectum	8.3 Other malignant	Unclassified	XId malignant melanomas	5. All Other Cancer Types	Rectum	C20.9-Rectum, NOS	209	8720	Malignant	Unknown	Blank(s)	Blank(s)	Not a paired site	Positive histology	8720/3: Malignant melanoma, NOS	8720/3: Malignant melanoma, NOS	8720-8799: nevi and melanomas	XId Malignant melanomas	Rectum	XI(d) Malignant melanomas	XI(d) Malignant melanomas	Not Brain	Blank(s)	Blank(s)	Blank(s)	37 MALIGNANT MELANOMA OF MUCOSA AND EXTRACUTANEOUS	7.1 Melanoma	Blank(s)	Distant	Blank(s)	Distant	Blank(s)	Blank(s)	Blank(s)	Blank(s)	Blank(s)	Blank(s)	Blank(s)	Blank(s)	Blank(s)
70-74 years	Female	2003	White	Non-Spanish-Hispanic-Latino	Non-Hispanic White	Rectum	Malignant	Rectum	Rectum	8.3 Other malignant	Unclassified	XId malignant melanomas	5. All Other Cancer Types	Rectum	C20.9-Rectum, NOS	209	8720	Malignant	Unknown	Blank(s)	Blank(s)	Not a paired site	Positive histology	8720/3: Malignant melanoma, NOS	8720/3: Malignant melanoma, NOS	8720-8799: nevi and melanomas	XId Malignant melanomas	Rectum	XI(d) Malignant melanomas	XI(d) Malignant melanomas	Not Brain	Blank(s)	Blank(s)	Blank(s)	37 MALIGNANT MELANOMA OF MUCOSA AND EXTRACUTANEOUS	7.1 Melanoma	Blank(s)	Distant	Blank(s)	Distant	Blank(s)	Blank(s)	Blank(s)	Blank(s)	Blank(s)	Blank(s)	Blank(s)	Blank(s)	Blank(s)
75-79 years	Female	2003	White	Non-Spanish-Hispanic-Latino	Non-Hispanic White	Rectum	Malignant	Rectum	Rectum	8.3 Other malignant	Unclassified	XId malignant melanomas	5. All Other Cancer Types	Rectum	C20.9-Rectum, NOS	209	8720	Malignant	Unknown	Blank(s)	Blank(s)	Not a paired site	Positive histology	8720/3: Malignant melanoma, NOS	8720/3: Malignant melanoma, NOS	8720-8799: nevi and melanomas	XId Malignant melanomas	Rectum	XI(d) Malignant melanomas	XI(d) Malignant melanomas	Not Brain	Blank(s)	Blank(s)	Blank(s)	37 MALIGNANT MELANOMA OF MUCOSA AND EXTRACUTANEOUS	7.1 Melanoma	Blank(s)	Regional	Blank(s)	Regional	Blank(s)	Blank(s)	Blank(s)	Blank(s)	Blank(s)	Blank(s)	Blank(s)	Blank(s)	Blank(s)
70-74 years	Male	2004	White	Non-Spanish-Hispanic-Latino	Non-Hispanic White	Rectum	Malignant	Rectum	Rectum	8.3 Other malignant	Unclassified	XId malignant melanomas	5. All Other Cancer Types	Rectum	C20.9-Rectum, NOS	209	8720	Malignant	Unknown	Blank(s)	Blank(s)	Not a paired site	Positive histology	8720/3: Malignant melanoma, NOS	8720/3: Malignant melanoma, NOS	8720-8799: nevi and melanomas	XId Malignant melanomas	Rectum	XI(d) Malignant melanomas	XI(d) Malignant melanomas	Not Brain	Blank(s)	Blank(s)	Blank(s)	37 MALIGNANT MELANOMA OF MUCOSA AND EXTRACUTANEOUS	7.1 Melanoma	Distant	Distant	Distant site(s)/node(s) involved	Distant	Blank(s)	Blank(s)	Blank(s)	Blank(s)	Blank(s)	Blank(s)	Blank(s)	Blank(s)	Blank(s)
65-69 years	Male	2002	White	Non-Spanish-Hispanic-Latino	Non-Hispanic White	Rectum	Malignant	Rectum	Rectum	8.3 Other malignant	Unclassified	XId malignant melanomas	5. All Other Cancer Types	Rectum	C20.9-Rectum, NOS	209	8720	Malignant	Unknown	Blank(s)	Blank(s)	Not a paired site	Positive histology	8720/3: Malignant melanoma, NOS	8720/3: Malignant melanoma, NOS	8720-8799: nevi and melanomas	XId Malignant melanomas	Rectum	XI(d) Malignant melanomas	XI(d) Malignant melanomas	Not Brain	Blank(s)	Blank(s)	Blank(s)	37 MALIGNANT MELANOMA OF MUCOSA AND EXTRACUTANEOUS	7.1 Melanoma	Blank(s)	Unknown/unstaged	Blank(s)	Unstaged	Blank(s)	Blank(s)	Blank(s)	Blank(s)	Blank(s)	Blank(s)	Blank(s)	Blank(s)	Blank(s)
80-84 years	Male	2013	White	Non-Spanish-Hispanic-Latino	Non-Hispanic White	Rectum	Malignant	Rectum	Rectum	8.3 Other malignant	Unclassified	XId malignant melanomas	5. All Other Cancer Types	Rectum	C20.9-Rectum, NOS	209	8720	Malignant	Unknown	Blank(s)	Blank(s)	Not a paired site	Positive histology	8720/3: Malignant melanoma, NOS	8720/3: Malignant melanoma, NOS	8720-8799: nevi and melanomas	XId Malignant melanomas	Rectum	XI(d) Malignant melanomas	XI(d) Malignant melanomas	Not Brain	Blank(s)	Blank(s)	Colon and Rectum	37 MALIGNANT MELANOMA OF MUCOSA AND EXTRACUTANEOUS	7.1 Melanoma	Localized	Localized	Localized only	Localized	Blank(s)	Blank(s)	Blank(s)	Blank(s)	NA	NA	NA	NA	Blank(s)
70-74 years	Female	2005	Asian or Pacific Islander	Non-Spanish-Hispanic-Latino	Non-Hispanic Asian or Pacific Islander	Rectum	Malignant	Rectum	Rectum	8.3 Other malignant	Unclassified	XId malignant melanomas	5. All Other Cancer Types	Rectum	C20.9-Rectum, NOS	209	8720	Malignant	Poorly differentiated; Grade III	Blank(s)	Blank(s)	Not a paired site	Positive histology	8720/3: Malignant melanoma, NOS	8720/3: Malignant melanoma, NOS	8720-8799: nevi and melanomas	XId Malignant melanomas	Rectum	XI(d) Malignant melanomas	XI(d) Malignant melanomas	Not Brain	Blank(s)	Blank(s)	Blank(s)	37 MALIGNANT MELANOMA OF MUCOSA AND EXTRACUTANEOUS	7.1 Melanoma	Regional	Regional	Regional lymph nodes involved only	Regional	Blank(s)	Blank(s)	Blank(s)	Blank(s)	Blank(s)	Blank(s)	Blank(s)	Blank(s)	Blank(s)
85+ years	Male	2006	White	Non-Spanish-Hispanic-Latino	Non-Hispanic White	Rectum	Malignant	Rectum	Rectum	8.3 Other malignant	Unclassified	XId malignant melanomas	5. All Other Cancer Types	Rectum	C20.9-Rectum, NOS	209	8720	Malignant	Unknown	Blank(s)	Blank(s)	Not a paired site	Positive histology	8720/3: Malignant melanoma, NOS	8720/3: Malignant melanoma, NOS	8720-8799: nevi and melanomas	XId Malignant melanomas	Rectum	XI(d) Malignant melanomas	XI(d) Malignant melanomas	Not Brain	Blank(s)	Blank(s)	Blank(s)	37 MALIGNANT MELANOMA OF MUCOSA AND EXTRACUTANEOUS	7.1 Melanoma	Localized	Localized	Localized only	Localized	Blank(s)	Blank(s)	Blank(s)	Blank(s)	Blank(s)	Blank(s)	Blank(s)	Blank(s)	Blank(s)
50-54 years	Female	2007	White	Spanish-Hispanic-Latino	Hispanic (All Races)	Rectum	Malignant	Rectum	Rectum	8.3 Other malignant	Unclassified	XId malignant melanomas	5. All Other Cancer Types	Rectum	C20.9-Rectum, NOS	209	8720	Malignant	Unknown	Blank(s)	Blank(s)	Not a paired site	Positive histology	8720/3: Malignant melanoma, NOS	8720/3: Malignant melanoma, NOS	8720-8799: nevi and melanomas	XId Malignant melanomas	Rectum	XI(d) Malignant melanomas	XI(d) Malignant melanomas	Not Brain	Blank(s)	Blank(s)	Blank(s)	37 MALIGNANT MELANOMA OF MUCOSA AND EXTRACUTANEOUS	7.1 Melanoma	Regional	Regional	Regional lymph nodes involved only	Regional	Blank(s)	Blank(s)	Blank(s)	Blank(s)	Blank(s)	Blank(s)	Blank(s)	Blank(s)	Blank(s)
75-79 years	Male	2008	White	Spanish-Hispanic-Latino	Hispanic (All Races)	Rectum	Malignant	Rectum	Rectum	8.3 Other malignant	Unclassified	XId malignant melanomas	5. All Other Cancer Types	Rectum	C20.9-Rectum, NOS	209	8720	Malignant	Unknown	Blank(s)	Blank(s)	Not a paired site	Positive histology	8720/3: Malignant melanoma, NOS	8720/3: Malignant melanoma, NOS	8720-8799: nevi and melanomas	XId Malignant melanomas	Rectum	XI(d) Malignant melanomas	XI(d) Malignant melanomas	Not Brain	Blank(s)	Blank(s)	Blank(s)	37 MALIGNANT MELANOMA OF MUCOSA AND EXTRACUTANEOUS	7.1 Melanoma	Localized	Localized	Localized only	Localized	Blank(s)	Blank(s)	Blank(s)	Blank(s)	Blank(s)	Blank(s)	Blank(s)	Blank(s)	Blank(s)
85+ years	Female	2011	White	Spanish-Hispanic-Latino	Hispanic (All Races)	Rectum	Malignant	Rectum	Rectum	8.3 Other malignant	Unclassified	XId malignant melanomas	5. All Other Cancer Types	Rectum	C20.9-Rectum, NOS	209	8720	Malignant	Unknown	Blank(s)	Blank(s)	Not a paired site	Positive histology	8720/3: Malignant melanoma, NOS	8720/3: Malignant melanoma, NOS	8720-8799: nevi and melanomas	XId Malignant melanomas	Rectum	XI(d) Malignant melanomas	XI(d) Malignant melanomas	Not Brain	Blank(s)	Blank(s)	Colon and Rectum	37 MALIGNANT MELANOMA OF MUCOSA AND EXTRACUTANEOUS	7.1 Melanoma	Distant	Distant	Distant site(s)/node(s) involved	Distant	Blank(s)	Blank(s)	Blank(s)	Blank(s)	NA	NA	NA	NA	Blank(s)
60-64 years	Male	2009	White	Spanish-Hispanic-Latino	Hispanic (All Races)	Rectum	Malignant	Rectum	Rectum	8.3 Other malignant	Unclassified	XId malignant melanomas	5. All Other Cancer Types	Rectum	C20.9-Rectum, NOS	209	8720	Malignant	Unknown	Blank(s)	Blank(s)	Not a paired site	Positive histology	8720/3: Malignant melanoma, NOS	8720/3: Malignant melanoma, NOS	8720-8799: nevi and melanomas	XId Malignant melanomas	Rectum	XI(d) Malignant melanomas	XI(d) Malignant melanomas	Not Brain	Blank(s)	Blank(s)	Blank(s)	37 MALIGNANT MELANOMA OF MUCOSA AND EXTRACUTANEOUS	7.1 Melanoma	Regional	Regional	Regional lymph nodes involved only	Regional	Blank(s)	Blank(s)	Blank(s)	Blank(s)	Blank(s)	Blank(s)	Blank(s)	Blank(s)	Blank(s)
70-74 years	Female	2009	White	Non-Spanish-Hispanic-Latino	Non-Hispanic White	Rectum	Malignant	Rectum	Rectum	8.3 Other malignant	Unclassified	XId malignant melanomas	5. All Other Cancer Types	Rectum	C20.9-Rectum, NOS	209	8720	Malignant	Unknown	Blank(s)	Blank(s)	Not a paired site	Positive histology	8720/3: Malignant melanoma, NOS	8720/3: Malignant melanoma, NOS	8720-8799: nevi and melanomas	XId Malignant melanomas	Rectum	XI(d) Malignant melanomas	XI(d) Malignant melanomas	Not Brain	Blank(s)	Blank(s)	Blank(s)	37 MALIGNANT MELANOMA OF MUCOSA AND EXTRACUTANEOUS	7.1 Melanoma	Distant	Distant	Distant site(s)/node(s) involved	Distant	Blank(s)	Blank(s)	Blank(s)	Blank(s)	Blank(s)	Blank(s)	Blank(s)	Blank(s)	Blank(s)
60-64 years	Male	2009	White	Non-Spanish-Hispanic-Latino	Non-Hispanic White	Rectum	Malignant	Rectum	Rectum	8.3 Other malignant	Unclassified	XId malignant melanomas	5. All Other Cancer Types	Rectum	C20.9-Rectum, NOS	209	8720	Malignant	Unknown	Blank(s)	Blank(s)	Not a paired site	Positive histology	8720/3: Malignant melanoma, NOS	8720/3: Malignant melanoma, NOS	8720-8799: nevi and melanomas	XId Malignant melanomas	Rectum	XI(d) Malignant melanomas	XI(d) Malignant melanomas	Not Brain	Blank(s)	Blank(s)	Blank(s)	37 MALIGNANT MELANOMA OF MUCOSA AND EXTRACUTANEOUS	7.1 Melanoma	Distant	Distant	Distant site(s)/node(s) involved	Distant	Blank(s)	Blank(s)	Blank(s)	Blank(s)	Blank(s)	Blank(s)	Blank(s)	Blank(s)	Blank(s)
70-74 years	Male	2009	White	Non-Spanish-Hispanic-Latino	Non-Hispanic White	Rectum	Malignant	Rectum	Rectum	8.3 Other malignant	Unclassified	XId malignant melanomas	5. All Other Cancer Types	Rectum	C20.9-Rectum, NOS	209	8720	Malignant	Unknown	Blank(s)	Blank(s)	Not a paired site	Positive histology	8720/3: Malignant melanoma, NOS	8720/3: Malignant melanoma, NOS	8720-8799: nevi and melanomas	XId Malignant melanomas	Rectum	XI(d) Malignant melanomas	XI(d) Malignant melanomas	Not Brain	Blank(s)	Blank(s)	Blank(s)	37 MALIGNANT MELANOMA OF MUCOSA AND EXTRACUTANEOUS	7.1 Melanoma	Localized	Localized	Localized only	Localized	Blank(s)	Blank(s)	Blank(s)	Blank(s)	Blank(s)	Blank(s)	Blank(s)	Blank(s)	Blank(s)
65-69 years	Male	2009	White	Non-Spanish-Hispanic-Latino	Non-Hispanic White	Rectosigmoid Junction	Malignant	Rectum	Rectum	8.3 Other malignant	Unclassified	XId malignant melanomas	5. All Other Cancer Types	Rectum	C19.9-Rectosigmoid junction	199	8720	Malignant	Poorly differentiated; Grade III	Blank(s)	Blank(s)	Not a paired site	Positive histology	8720/3: Malignant melanoma, NOS	8720/3: Malignant melanoma, NOS	8720-8799: nevi and melanomas	XId Malignant melanomas	Rectosigmoid Junction	XI(d) Malignant melanomas	XI(d) Malignant melanomas	Not Brain	Blank(s)	Blank(s)	Blank(s)	37 MALIGNANT MELANOMA OF MUCOSA AND EXTRACUTANEOUS	7.1 Melanoma	Regional	Regional	Regional by both direct extension and lymph node involvement	Regional	Blank(s)	Blank(s)	Blank(s)	Blank(s)	Blank(s)	Blank(s)	Blank(s)	Blank(s)	Blank(s)
50-54 years	Female	2010	White	Spanish-Hispanic-Latino	Hispanic (All Races)	Rectum	Malignant	Rectum	Rectum	8.3 Other malignant	Unclassified	XId malignant melanomas	5. All Other Cancer Types	Rectum	C20.9-Rectum, NOS	209	8720	Malignant	Unknown	Blank(s)	Blank(s)	Not a paired site	Positive histology	8720/3: Malignant melanoma, NOS	8720/3: Malignant melanoma, NOS	8720-8799: nevi and melanomas	XId Malignant melanomas	Rectum	XI(d) Malignant melanomas	XI(d) Malignant melanomas	Not Brain	Blank(s)	Blank(s)	Colon and Rectum	37 MALIGNANT MELANOMA OF MUCOSA AND EXTRACUTANEOUS	7.1 Melanoma	Localized	Localized	Localized only	Localized	Blank(s)	Blank(s)	Blank(s)	Blank(s)	NA	NA	NA	NA	Blank(s)
55-59 years	Female	2013	White	Spanish-Hispanic-Latino	Hispanic (All Races)	Rectum	Malignant	Rectum	Rectum	8.3 Other malignant	Unclassified	XId malignant melanomas	5. All Other Cancer Types	Rectum	C20.9-Rectum, NOS	209	8720	Malignant	Unknown	Blank(s)	Blank(s)	Not a paired site	Positive histology	8720/3: Malignant melanoma, NOS	8720/3: Malignant melanoma, NOS	8720-8799: nevi and melanomas	XId Malignant melanomas	Rectum	XI(d) Malignant melanomas	XI(d) Malignant melanomas	Not Brain	Blank(s)	Blank(s)	Colon and Rectum	37 MALIGNANT MELANOMA OF MUCOSA AND EXTRACUTANEOUS	7.1 Melanoma	Regional	Regional	Regional lymph nodes involved only	Regional	Blank(s)	Blank(s)	Blank(s)	Blank(s)	NA	NA	NA	NA	Blank(s)
60-64 years	Female	2011	White	Non-Spanish-Hispanic-Latino	Non-Hispanic White	Rectum	Malignant	Rectum	Rectum	8.3 Other malignant	Unclassified	XId malignant melanomas	5. All Other Cancer Types	Rectum	C20.9-Rectum, NOS	209	8720	Malignant	Unknown	Blank(s)	Blank(s)	Not a paired site	Positive histology	8720/3: Malignant melanoma, NOS	8720/3: Malignant melanoma, NOS	8720-8799: nevi and melanomas	XId Malignant melanomas	Rectum	XI(d) Malignant melanomas	XI(d) Malignant melanomas	Not Brain	Blank(s)	Blank(s)	Colon and Rectum	37 MALIGNANT MELANOMA OF MUCOSA AND EXTRACUTANEOUS	7.1 Melanoma	Localized	Localized	Localized only	Localized	Blank(s)	Blank(s)	Blank(s)	Blank(s)	NA	NA	NA	NA	Blank(s)
70-74 years	Female	2011	White	Non-Spanish-Hispanic-Latino	Non-Hispanic White	Rectum	Malignant	Rectum	Rectum	8.3 Other malignant	Unclassified	XId malignant melanomas	5. All Other Cancer Types	Rectum	C20.9-Rectum, NOS	209	8720	Malignant	Unknown	Blank(s)	Blank(s)	Not a paired site	Positive histology	8720/3: Malignant melanoma, NOS	8720/3: Malignant melanoma, NOS	8720-8799: nevi and melanomas	XId Malignant melanomas	Rectum	XI(d) Malignant melanomas	XI(d) Malignant melanomas	Not Brain	Blank(s)	Blank(s)	Colon and Rectum	37 MALIGNANT MELANOMA OF MUCOSA AND EXTRACUTANEOUS	7.1 Melanoma	Distant	Distant	Distant site(s)/node(s) involved	Distant	Blank(s)	Blank(s)	Blank(s)	Blank(s)	NA	NA	NA	NA	Blank(s)
75-79 years	Female	2012	White	Non-Spanish-Hispanic-Latino	Non-Hispanic White	Rectum	Malignant	Rectum	Rectum	8.3 Other malignant	Unclassified	XId malignant melanomas	5. All Other Cancer Types	Rectum	C20.9-Rectum, NOS	209	8720	Malignant	Unknown	Blank(s)	Blank(s)	Not a paired site	Positive histology	8720/3: Malignant melanoma, NOS	8720/3: Malignant melanoma, NOS	8720-8799: nevi and melanomas	XId Malignant melanomas	Rectum	XI(d) Malignant melanomas	XI(d) Malignant melanomas	Not Brain	Blank(s)	Blank(s)	Colon and Rectum	37 MALIGNANT MELANOMA OF MUCOSA AND EXTRACUTANEOUS	7.1 Melanoma	Localized	Localized	Localized only	Localized	Blank(s)	Blank(s)	Blank(s)	Blank(s)	NA	NA	NA	NA	Blank(s)
45-49 years	Male	2012	White	Spanish-Hispanic-Latino	Hispanic (All Races)	Rectum	Malignant	Rectum	Rectum	8.3 Other malignant	Unclassified	XId malignant melanomas	5. All Other Cancer Types	Rectum	C20.9-Rectum, NOS	209	8720	Malignant	Poorly differentiated; Grade III	Blank(s)	Blank(s)	Not a paired site	Positive histology	8720/3: Malignant melanoma, NOS	8720/3: Malignant melanoma, NOS	8720-8799: nevi and melanomas	XId Malignant melanomas	Rectum	XI(d) Malignant melanomas	XI(d) Malignant melanomas	Not Brain	Blank(s)	Blank(s)	Colon and Rectum	37 MALIGNANT MELANOMA OF MUCOSA AND EXTRACUTANEOUS	7.1 Melanoma	Regional	Regional	Regional by both direct extension and lymph node involvement	Regional	Blank(s)	Blank(s)	Blank(s)	Blank(s)	NA	NA	NA	NA	Blank(s)
60-64 years	Male	2012	White	Non-Spanish-Hispanic-Latino	Non-Hispanic White	Rectum	Malignant	Rectum	Rectum	8.2 Nodular melanoma	Unclassified	XId malignant melanomas	5. All Other Cancer Types	Rectum	C20.9-Rectum, NOS	209	8721	Malignant	Unknown	Blank(s)	Blank(s)	Not a paired site	Positive histology	8721/3: Nodular melanoma	8721/3: Nodular melanoma	8720-8799: nevi and melanomas	XId Malignant melanomas	Rectum	XI(d) Malignant melanomas	XI(d) Malignant melanomas	Not Brain	Blank(s)	Blank(s)	Colon and Rectum	37 MALIGNANT MELANOMA OF MUCOSA AND EXTRACUTANEOUS	7.1 Melanoma	Localized	Localized	Localized only	Localized	Blank(s)	Blank(s)	Blank(s)	Blank(s)	NA	NA	NA	NA	Blank(s)
75-79 years	Male	2016	White	Non-Spanish-Hispanic-Latino	Non-Hispanic White	Rectum	Malignant	Rectum	Rectum	8.3 Other malignant	Unclassified	XId malignant melanomas	5. All Other Cancer Types	Rectum	C20.9-Rectum, NOS	209	8720	Malignant	Unknown	Blank(s)	Blank(s)	Not a paired site	Positive histology	8720/3: Malignant melanoma, NOS	8720/3: Malignant melanoma, NOS	8720-8799: nevi and melanomas	XId Malignant melanomas	Rectum	XI(d) Malignant melanomas	XI(d) Malignant melanomas	Not Brain	Blank(s)	Blank(s)	Colon and Rectum	37 MALIGNANT MELANOMA OF MUCOSA AND EXTRACUTANEOUS	7.1 Melanoma	Distant	Distant	Distant site(s)/node(s) involved	Blank(s)	Blank(s)	Blank(s)	Blank(s)	Blank(s)	Blank(s)	Blank(s)	Blank(s)	Blank(s)	Not applicable
60-64 years	Female	2013	White	Spanish-Hispanic-Latino	Hispanic (All Races)	Rectum	Malignant	Rectum	Rectum	8.3 Other malignant	Unclassified	XId malignant melanomas	5. All Other Cancer Types	Rectum	C20.9-Rectum, NOS	209	8720	Malignant	Unknown	Blank(s)	Blank(s)	Not a paired site	Positive histology	8720/3: Malignant melanoma, NOS	8720/3: Malignant melanoma, NOS	8720-8799: nevi and melanomas	XId Malignant melanomas	Rectum	XI(d) Malignant melanomas	XI(d) Malignant melanomas	Not Brain	Blank(s)	Blank(s)	Colon and Rectum	37 MALIGNANT MELANOMA OF MUCOSA AND EXTRACUTANEOUS	7.1 Melanoma	Regional	Regional	Regional by both direct extension and lymph node involvement	Regional	Blank(s)	Blank(s)	Blank(s)	Blank(s)	NA	NA	NA	NA	Blank(s)
60-64 years	Female	2015	White	Spanish-Hispanic-Latino	Hispanic (All Races)	Rectum	Malignant	Rectum	Rectum	8.3 Other malignant	Unclassified	XId malignant melanomas	5. All Other Cancer Types	Rectum	C20.9-Rectum, NOS	209	8720	Malignant	Unknown	Blank(s)	Blank(s)	Not a paired site	Positive histology	8720/3: Malignant melanoma, NOS	8720/3: Malignant melanoma, NOS	8720-8799: nevi and melanomas	XId Malignant melanomas	Rectum	XI(d) Malignant melanomas	XI(d) Malignant melanomas	Not Brain	Blank(s)	Blank(s)	Colon and Rectum	37 MALIGNANT MELANOMA OF MUCOSA AND EXTRACUTANEOUS	7.1 Melanoma	Localized	Localized	Localized only	Localized	Blank(s)	Blank(s)	Blank(s)	Blank(s)	NA	NA	NA	NA	Blank(s)
65-69 years	Female	2015	White	Spanish-Hispanic-Latino	Hispanic (All Races)	Rectum	Malignant	Rectum	Rectum	8.3 Other malignant	Unclassified	XId malignant melanomas	5. All Other Cancer Types	Rectum	C20.9-Rectum, NOS	209	8730	Malignant	Unknown	Blank(s)	Blank(s)	Not a paired site	Positive histology	8730/3: Amelanotic melanoma	8730/3: Amelanotic melanoma	8720-8799: nevi and melanomas	XId Malignant melanomas	Rectum	XI(d) Malignant melanomas	XI(d) Malignant melanomas	Not Brain	Blank(s)	Blank(s)	Colon and Rectum	37 MALIGNANT MELANOMA OF MUCOSA AND EXTRACUTANEOUS	7.1 Melanoma	Localized	Localized	Localized only	Localized	Blank(s)	Blank(s)	Blank(s)	Blank(s)	NA	NA	NA	NA	Blank(s)
85+ years	Female	2015	White	Spanish-Hispanic-Latino	Hispanic (All Races)	Rectum	Malignant	Rectum	Rectum	8.2 Nodular melanoma	Unclassified	XId malignant melanomas	5. All Other Cancer Types	Rectum	C20.9-Rectum, NOS	209	8721	Malignant	Unknown	Blank(s)	Blank(s)	Not a paired site	Positive histology	8721/3: Nodular melanoma	8721/3: Nodular melanoma	8720-8799: nevi and melanomas	XId Malignant melanomas	Rectum	XI(d) Malignant melanomas	XI(d) Malignant melanomas	Not Brain	Blank(s)	Blank(s)	Colon and Rectum	37 MALIGNANT MELANOMA OF MUCOSA AND EXTRACUTANEOUS	7.1 Melanoma	Localized	Localized	Localized only	Localized	Blank(s)	Blank(s)	Blank(s)	Blank(s)	NA	NA	NA	NA	Blank(s)
70-74 years	Male	2016	White	Non-Spanish-Hispanic-Latino	Non-Hispanic White	Rectum	Malignant	Rectum	Rectum	8.3 Other malignant	Unclassified	XId malignant melanomas	5. All Other Cancer Types	Rectum	C20.9-Rectum, NOS	209	8720	Malignant	Unknown	Blank(s)	Blank(s)	Not a paired site	Positive histology	8720/3: Malignant melanoma, NOS	8720/3: Malignant melanoma, NOS	8720-8799: nevi and melanomas	XId Malignant melanomas	Rectum	XI(d) Malignant melanomas	XI(d) Malignant melanomas	Not Brain	Blank(s)	Blank(s)	Colon and Rectum	37 MALIGNANT MELANOMA OF MUCOSA AND EXTRACUTANEOUS	7.1 Melanoma	Regional	Regional	Regional by direct extension only	Blank(s)	Blank(s)	Blank(s)	Blank(s)	Blank(s)	Blank(s)	Blank(s)	Blank(s)	Blank(s)	Not applicable
40-44 years	Female	2016	White	Spanish-Hispanic-Latino	Hispanic (All Races)	Rectum	Malignant	Rectum	Rectum	8.3 Other malignant	Unclassified	XId malignant melanomas	5. All Other Cancer Types	Rectum	C20.9-Rectum, NOS	209	8720	Malignant	Unknown	Blank(s)	Blank(s)	Not a paired site	Positive histology	8720/3: Malignant melanoma, NOS	8720/3: Malignant melanoma, NOS	8720-8799: nevi and melanomas	XId Malignant melanomas	Rectum	XI(d) Malignant melanomas	XI(d) Malignant melanomas	Not Brain	Blank(s)	Blank(s)	Colon and Rectum	37 MALIGNANT MELANOMA OF MUCOSA AND EXTRACUTANEOUS	7.1 Melanoma	Regional	Regional	Regional by both direct extension and lymph node involvement	Blank(s)	Blank(s)	Blank(s)	Blank(s)	Blank(s)	Blank(s)	Blank(s)	Blank(s)	Blank(s)	Not applicable
70-74 years	Female	2016	White	Spanish-Hispanic-Latino	Hispanic (All Races)	Rectum	Malignant	Rectum	Rectum	8.3 Other malignant	Unclassified	XId malignant melanomas	5. All Other Cancer Types	Rectum	C20.9-Rectum, NOS	209	8720	Malignant	Unknown	Blank(s)	Blank(s)	Not a paired site	Positive histology	8720/3: Malignant melanoma, NOS	8720/3: Malignant melanoma, NOS	8720-8799: nevi and melanomas	XId Malignant melanomas	Rectum	XI(d) Malignant melanomas	XI(d) Malignant melanomas	Not Brain	Blank(s)	Blank(s)	Colon and Rectum	37 MALIGNANT MELANOMA OF MUCOSA AND EXTRACUTANEOUS	7.1 Melanoma	Localized	Localized	Localized only	Blank(s)	Blank(s)	Blank(s)	Blank(s)	Blank(s)	Blank(s)	Blank(s)	Blank(s)	Blank(s)	Not applicable
70-74 years	Female	2016	White	Non-Spanish-Hispanic-Latino	Non-Hispanic White	Rectum	Malignant	Rectum	Rectum	8.3 Other malignant	Unclassified	XId malignant melanomas	5. All Other Cancer Types	Rectum	C20.9-Rectum, NOS	209	8720	Malignant	Unknown	Blank(s)	Blank(s)	Not a paired site	Positive histology	8720/3: Malignant melanoma, NOS	8720/3: Malignant melanoma, NOS	8720-8799: nevi and melanomas	XId Malignant melanomas	Rectum	XI(d) Malignant melanomas	XI(d) Malignant melanomas	Not Brain	Blank(s)	Blank(s)	Colon and Rectum	37 MALIGNANT MELANOMA OF MUCOSA AND EXTRACUTANEOUS	7.1 Melanoma	Localized	Localized	Localized only	Blank(s)	Blank(s)	Blank(s)	Blank(s)	Blank(s)	Blank(s)	Blank(s)	Blank(s)	Blank(s)	Not applicable
75-79 years	Female	2016	White	Non-Spanish-Hispanic-Latino	Non-Hispanic White	Rectum	Malignant	Rectum	Rectum	8.3 Other malignant	Unclassified	XId malignant melanomas	5. All Other Cancer Types	Rectum	C20.9-Rectum, NOS	209	8720	Malignant	Unknown	Blank(s)	Blank(s)	Not a paired site	Positive histology	8720/3: Malignant melanoma, NOS	8720/3: Malignant melanoma, NOS	8720-8799: nevi and melanomas	XId Malignant melanomas	Rectum	XI(d) Malignant melanomas	XI(d) Malignant melanomas	Not Brain	Blank(s)	Blank(s)	Colon and Rectum	37 MALIGNANT MELANOMA OF MUCOSA AND EXTRACUTANEOUS	7.1 Melanoma	Distant	Distant	Distant site(s)/node(s) involved	Blank(s)	Blank(s)	Blank(s)	Blank(s)	Blank(s)	Blank(s)	Blank(s)	Blank(s)	Blank(s)	Not applicable
45-49 years	Female	2017	White	Non-Spanish-Hispanic-Latino	Non-Hispanic White	Rectum	Malignant	Rectum	Rectum	8.3 Other malignant	Unclassified	XId malignant melanomas	5. All Other Cancer Types	Rectum	C20.9-Rectum, NOS	209	8720	Malignant	Unknown	Blank(s)	Blank(s)	Not a paired site	Positive histology	8720/3: Malignant melanoma, NOS	8720/3: Malignant melanoma, NOS	8720-8799: nevi and melanomas	XId Malignant melanomas	Rectum	XI(d) Malignant melanomas	XI(d) Malignant melanomas	Not Brain	Blank(s)	Blank(s)	Colon and Rectum	37 MALIGNANT MELANOMA OF MUCOSA AND EXTRACUTANEOUS	7.1 Melanoma	Distant	Distant	Distant site(s)/node(s) involved	Blank(s)	Blank(s)	Blank(s)	Blank(s)	Blank(s)	Blank(s)	Blank(s)	Blank(s)	Blank(s)	Not applicable
45-49 years	Male	2001	White	Non-Spanish-Hispanic-Latino	Non-Hispanic White	Rectum	Malignant	Rectum	Rectum	8.3 Other malignant	Unclassified	XId malignant melanomas	5. All Other Cancer Types	Rectum	C20.9-Rectum, NOS	209	8746	Malignant	Unknown	Blank(s)	Blank(s)	Not a paired site	Positive histology	8746/3: Mucosal lentiginous melanoma	8746/3: Mucosal lentiginous melanoma	8720-8799: nevi and melanomas	XId Malignant melanomas	Rectum	XI(d) Malignant melanomas	XI(d) Malignant melanomas	Not Brain	Blank(s)	Blank(s)	Blank(s)	37 MALIGNANT MELANOMA OF MUCOSA AND EXTRACUTANEOUS	7.1 Melanoma	Blank(s)	Localized	Blank(s)	Localized	Blank(s)	Blank(s)	Blank(s)	Blank(s)	Blank(s)	Blank(s)	Blank(s)	Blank(s)	Blank(s)
60-64 years	Female	2001	White	Non-Spanish-Hispanic-Latino	Non-Hispanic White	Rectum	Malignant	Rectum	Rectum	8.3 Other malignant	Unclassified	XId malignant melanomas	5. All Other Cancer Types	Rectum	C20.9-Rectum, NOS	209	8720	Malignant	Unknown	Blank(s)	Blank(s)	Not a paired site	Positive histology	8720/3: Malignant melanoma, NOS	8720/3: Malignant melanoma, NOS	8720-8799: nevi and melanomas	XId Malignant melanomas	Rectum	XI(d) Malignant melanomas	XI(d) Malignant melanomas	Not Brain	Blank(s)	Blank(s)	Blank(s)	37 MALIGNANT MELANOMA OF MUCOSA AND EXTRACUTANEOUS	7.1 Melanoma	Blank(s)	Localized	Blank(s)	Localized	Blank(s)	Blank(s)	Blank(s)	Blank(s)	Blank(s)	Blank(s)	Blank(s)	Blank(s)	Blank(s)
80-84 years	Female	2003	White	Non-Spanish-Hispanic-Latino	Non-Hispanic White	Rectum	Malignant	Rectum	Rectum	8.3 Other malignant	Unclassified	XId malignant melanomas	5. All Other Cancer Types	Rectum	C20.9-Rectum, NOS	209	8720	Malignant	Unknown	Blank(s)	Blank(s)	Not a paired site	Positive histology	8720/3: Malignant melanoma, NOS	8720/3: Malignant melanoma, NOS	8720-8799: nevi and melanomas	XId Malignant melanomas	Rectum	XI(d) Malignant melanomas	XI(d) Malignant melanomas	Not Brain	Blank(s)	Blank(s)	Blank(s)	37 MALIGNANT MELANOMA OF MUCOSA AND EXTRACUTANEOUS	7.1 Melanoma	Blank(s)	Unknown/unstaged	Blank(s)	Unstaged	Blank(s)	Blank(s)	Blank(s)	Blank(s)	Blank(s)	Blank(s)	Blank(s)	Blank(s)	Blank(s)
85+ years	Female	2004	Black	Non-Spanish-Hispanic-Latino	Non-Hispanic Black	Rectum	Malignant	Rectum	Rectum	8.3 Other malignant	Unclassified	XId malignant melanomas	5. All Other Cancer Types	Rectum	C20.9-Rectum, NOS	209	8720	Malignant	Unknown	Blank(s)	Blank(s)	Not a paired site	Positive histology	8720/3: Malignant melanoma, NOS	8720/3: Malignant melanoma, NOS	8720-8799: nevi and melanomas	XId Malignant melanomas	Rectum	XI(d) Malignant melanomas	XI(d) Malignant melanomas	Not Brain	Blank(s)	Blank(s)	Blank(s)	37 MALIGNANT MELANOMA OF MUCOSA AND EXTRACUTANEOUS	7.1 Melanoma	Unknown/unstaged	Unknown/unstaged	Unknown/unstaged/unspecified/DCO	Unstaged	Blank(s)	Blank(s)	Blank(s)	Blank(s)	Blank(s)	Blank(s)	Blank(s)	Blank(s)	Blank(s)
75-79 years	Male	2005	White	Non-Spanish-Hispanic-Latino	Non-Hispanic White	Rectum	Malignant	Rectum	Rectum	8.3 Other malignant	Unclassified	XId malignant melanomas	5. All Other Cancer Types	Rectum	C20.9-Rectum, NOS	209	8720	Malignant	Poorly differentiated; Grade III	Blank(s)	Blank(s)	Not a paired site	Positive histology	8720/3: Malignant melanoma, NOS	8720/3: Malignant melanoma, NOS	8720-8799: nevi and melanomas	XId Malignant melanomas	Rectum	XI(d) Malignant melanomas	XI(d) Malignant melanomas	Not Brain	Blank(s)	Blank(s)	Blank(s)	37 MALIGNANT MELANOMA OF MUCOSA AND EXTRACUTANEOUS	7.1 Melanoma	Unknown/unstaged	Unknown/unstaged	Unknown/unstaged/unspecified/DCO	Unstaged	Blank(s)	Blank(s)	Blank(s)	Blank(s)	Blank(s)	Blank(s)	Blank(s)	Blank(s)	Blank(s)
55-59 years	Female	2006	White	Non-Spanish-Hispanic-Latino	Non-Hispanic White	Rectum	Malignant	Rectum	Rectum	8.3 Other malignant	Unclassified	XId malignant melanomas	5. All Other Cancer Types	Rectum	C20.9-Rectum, NOS	209	8720	Malignant	Unknown	Blank(s)	Blank(s)	Not a paired site	Positive histology	8720/3: Malignant melanoma, NOS	8720/3: Malignant melanoma, NOS	8720-8799: nevi and melanomas	XId Malignant melanomas	Rectum	XI(d) Malignant melanomas	XI(d) Malignant melanomas	Not Brain	Blank(s)	Blank(s)	Blank(s)	37 MALIGNANT MELANOMA OF MUCOSA AND EXTRACUTANEOUS	7.1 Melanoma	Localized	Localized	Localized only	Localized	Blank(s)	Blank(s)	Blank(s)	Blank(s)	Blank(s)	Blank(s)	Blank(s)	Blank(s)	Blank(s)
75-79 years	Female	2006	White	Non-Spanish-Hispanic-Latino	Non-Hispanic White	Rectum	Malignant	Rectum	Rectum	8.3 Other malignant	Unclassified	XId malignant melanomas	5. All Other Cancer Types	Rectum	C20.9-Rectum, NOS	209	8720	Malignant	Poorly differentiated; Grade III	Blank(s)	Blank(s)	Not a paired site	Positive histology	8720/3: Malignant melanoma, NOS	8720/3: Malignant melanoma, NOS	8720-8799: nevi and melanomas	XId Malignant melanomas	Rectum	XI(d) Malignant melanomas	XI(d) Malignant melanomas	Not Brain	Blank(s)	Blank(s)	Blank(s)	37 MALIGNANT MELANOMA OF MUCOSA AND EXTRACUTANEOUS	7.1 Melanoma	Localized	Localized	Localized only	Localized	Blank(s)	Blank(s)	Blank(s)	Blank(s)	Blank(s)	Blank(s)	Blank(s)	Blank(s)	Blank(s)
50-54 years	Female	2009	White	Non-Spanish-Hispanic-Latino	Non-Hispanic White	Rectum	Malignant	Rectum	Rectum	8.3 Other malignant	Unclassified	XId malignant melanomas	5. All Other Cancer Types	Rectum	C20.9-Rectum, NOS	209	8720	Malignant	Unknown	Blank(s)	Blank(s)	Not a paired site	Positive histology	8720/3: Malignant melanoma, NOS	8720/3: Malignant melanoma, NOS	8720-8799: nevi and melanomas	XId Malignant melanomas	Rectum	XI(d) Malignant melanomas	XI(d) Malignant melanomas	Not Brain	Blank(s)	Blank(s)	Blank(s)	37 MALIGNANT MELANOMA OF MUCOSA AND EXTRACUTANEOUS	7.1 Melanoma	Unknown/unstaged	Unknown/unstaged	Unknown/unstaged/unspecified/DCO	Unstaged	Blank(s)	Blank(s)	Blank(s)	Blank(s)	Blank(s)	Blank(s)	Blank(s)	Blank(s)	Blank(s)
85+ years	Female	2011	White	Non-Spanish-Hispanic-Latino	Non-Hispanic White	Rectum	Malignant	Rectum	Rectum	8.3 Other malignant	Unclassified	XId malignant melanomas	5. All Other Cancer Types	Rectum	C20.9-Rectum, NOS	209	8730	Malignant	Unknown	Blank(s)	Blank(s)	Not a paired site	Positive histology	8730/3: Amelanotic melanoma	8730/3: Amelanotic melanoma	8720-8799: nevi and melanomas	XId Malignant melanomas	Rectum	XI(d) Malignant melanomas	XI(d) Malignant melanomas	Not Brain	Blank(s)	Blank(s)	Colon and Rectum	37 MALIGNANT MELANOMA OF MUCOSA AND EXTRACUTANEOUS	7.1 Melanoma	Unknown/unstaged	Unknown/unstaged	Unknown/unstaged/unspecified/DCO	Unstaged	Blank(s)	Blank(s)	Blank(s)	Blank(s)	NA	NA	NA	NA	Blank(s)
60-64 years	Female	2010	White	Non-Spanish-Hispanic-Latino	Non-Hispanic White	Rectum	Malignant	Rectum	Rectum	8.3 Other malignant	Unclassified	XId malignant melanomas	5. All Other Cancer Types	Rectum	C20.9-Rectum, NOS	209	8720	Malignant	Unknown	Blank(s)	Blank(s)	Not a paired site	Radiography without microscopic confirm	8720/3: Malignant melanoma, NOS	8720/3: Malignant melanoma, NOS	8720-8799: nevi and melanomas	XId Malignant melanomas	Rectum	XI(d) Malignant melanomas	XI(d) Malignant melanomas	Not Brain	Blank(s)	Blank(s)	Colon and Rectum	37 MALIGNANT MELANOMA OF MUCOSA AND EXTRACUTANEOUS	7.1 Melanoma	Distant	Distant	Distant site(s)/node(s) involved	Distant	Blank(s)	Blank(s)	Blank(s)	Blank(s)	NA	NA	NA	NA	Blank(s)
70-74 years	Female	2015	White	Non-Spanish-Hispanic-Latino	Non-Hispanic White	Rectum	Malignant	Rectum	Rectum	8.3 Other malignant	Unclassified	XId malignant melanomas	5. All Other Cancer Types	Rectum	C20.9-Rectum, NOS	209	8720	Malignant	Poorly differentiated; Grade III	Blank(s)	Blank(s)	Not a paired site	Positive histology	8720/3: Malignant melanoma, NOS	8720/3: Malignant melanoma, NOS	8720-8799: nevi and melanomas	XId Malignant melanomas	Rectum	XI(d) Malignant melanomas	XI(d) Malignant melanomas	Not Brain	Blank(s)	Blank(s)	Colon and Rectum	37 MALIGNANT MELANOMA OF MUCOSA AND EXTRACUTANEOUS	7.1 Melanoma	Regional	Regional	Regional lymph nodes involved only	Regional	Blank(s)	Blank(s)	Blank(s)	Blank(s)	NA	NA	NA	NA	Blank(s)
60-64 years	Female	2011	White	Spanish-Hispanic-Latino	Hispanic (All Races)	Rectum	Malignant	Rectum	Rectum	8.3 Other malignant	Unclassified	XId malignant melanomas	5. All Other Cancer Types	Rectum	C20.9-Rectum, NOS	209	8720	Malignant	Unknown	Blank(s)	Blank(s)	Not a paired site	Positive histology	8720/3: Malignant melanoma, NOS	8720/3: Malignant melanoma, NOS	8720-8799: nevi and melanomas	XId Malignant melanomas	Rectum	XI(d) Malignant melanomas	XI(d) Malignant melanomas	Not Brain	Blank(s)	Blank(s)	Colon and Rectum	37 MALIGNANT MELANOMA OF MUCOSA AND EXTRACUTANEOUS	7.1 Melanoma	Localized	Localized	Localized only	Localized	Blank(s)	Blank(s)	Blank(s)	Blank(s)	NA	NA	NA	NA	Blank(s)
50-54 years	Male	2002	White	Non-Spanish-Hispanic-Latino	Non-Hispanic White	Rectum	Malignant	Rectum	Rectum	8.3 Other malignant	Unclassified	XId malignant melanomas	5. All Other Cancer Types	Rectum	C20.9-Rectum, NOS	209	8720	Malignant	Unknown	Blank(s)	Blank(s)	Not a paired site	Positive histology	8720/3: Malignant melanoma, NOS	8720/3: Malignant melanoma, NOS	8720-8799: nevi and melanomas	XId Malignant melanomas	Rectum	XI(d) Malignant melanomas	XI(d) Malignant melanomas	Not Brain	Blank(s)	Blank(s)	Blank(s)	37 MALIGNANT MELANOMA OF MUCOSA AND EXTRACUTANEOUS	7.1 Melanoma	Blank(s)	Unknown/unstaged	Blank(s)	Unstaged	Blank(s)	Blank(s)	Blank(s)	Blank(s)	Blank(s)	Blank(s)	Blank(s)	Blank(s)	Blank(s)
65-69 years	Male	2006	White	Non-Spanish-Hispanic-Latino	Non-Hispanic White	Rectum	Malignant	Rectum	Rectum	8.3 Other malignant	Unclassified	XId malignant melanomas	5. All Other Cancer Types	Rectum	C20.9-Rectum, NOS	209	8720	Malignant	Unknown	Blank(s)	Blank(s)	Not a paired site	Positive histology	8720/3: Malignant melanoma, NOS	8720/3: Malignant melanoma, NOS	8720-8799: nevi and melanomas	XId Malignant melanomas	Rectum	XI(d) Malignant melanomas	XI(d) Malignant melanomas	Not Brain	Blank(s)	Blank(s)	Blank(s)	37 MALIGNANT MELANOMA OF MUCOSA AND EXTRACUTANEOUS	7.1 Melanoma	Localized	Localized	Localized only	Localized	Blank(s)	Blank(s)	Blank(s)	Blank(s)	Blank(s)	Blank(s)	Blank(s)	Blank(s)	Blank(s)
60-64 years	Male	2006	White	Non-Spanish-Hispanic-Latino	Non-Hispanic White	Rectum	Malignant	Rectum	Rectum	8.3 Other malignant	Unclassified	XId malignant melanomas	5. All Other Cancer Types	Rectum	C20.9-Rectum, NOS	209	8720	Malignant	Unknown	Blank(s)	Blank(s)	Not a paired site	Positive histology	8720/3: Malignant melanoma, NOS	8720/3: Malignant melanoma, NOS	8720-8799: nevi and melanomas	XId Malignant melanomas	Rectum	XI(d) Malignant melanomas	XI(d) Malignant melanomas	Not Brain	Blank(s)	Blank(s)	Blank(s)	37 MALIGNANT MELANOMA OF MUCOSA AND EXTRACUTANEOUS	7.1 Melanoma	Regional	Regional	Regional lymph nodes involved only	Regional	Blank(s)	Blank(s)	Blank(s)	Blank(s)	Blank(s)	Blank(s)	Blank(s)	Blank(s)	Blank(s)
70-74 years	Female	2001	White	Non-Spanish-Hispanic-Latino	Non-Hispanic White	Rectum	Malignant	Rectum	Rectum	8.3 Other malignant	Unclassified	XId malignant melanomas	5. All Other Cancer Types	Rectum	C20.9-Rectum, NOS	209	8720	Malignant	Unknown	Blank(s)	Blank(s)	Not a paired site	Positive histology	8720/3: Malignant melanoma, NOS	8720/3: Malignant melanoma, NOS	8720-8799: nevi and melanomas	XId Malignant melanomas	Rectum	XI(d) Malignant melanomas	XI(d) Malignant melanomas	Not Brain	Blank(s)	Blank(s)	Blank(s)	37 MALIGNANT MELANOMA OF MUCOSA AND EXTRACUTANEOUS	7.1 Melanoma	Blank(s)	Distant	Blank(s)	Distant	Blank(s)	Blank(s)	Blank(s)	Blank(s)	Blank(s)	Blank(s)	Blank(s)	Blank(s)	Blank(s)
60-64 years	Female	2001	White	Non-Spanish-Hispanic-Latino	Non-Hispanic White	Rectum	Malignant	Rectum	Rectum	8.3 Other malignant	Unclassified	XId malignant melanomas	5. All Other Cancer Types	Rectum	C20.9-Rectum, NOS	209	8720	Malignant	Unknown	Blank(s)	Blank(s)	Not a paired site	Positive histology	8720/3: Malignant melanoma, NOS	8720/3: Malignant melanoma, NOS	8720-8799: nevi and melanomas	XId Malignant melanomas	Rectum	XI(d) Malignant melanomas	XI(d) Malignant melanomas	Not Brain	Blank(s)	Blank(s)	Blank(s)	37 MALIGNANT MELANOMA OF MUCOSA AND EXTRACUTANEOUS	7.1 Melanoma	Blank(s)	Localized	Blank(s)	Localized	Blank(s)	Blank(s)	Blank(s)	Blank(s)	Blank(s)	Blank(s)	Blank(s)	Blank(s)	Blank(s)
85+ years	Male	2003	White	Non-Spanish-Hispanic-Latino	Non-Hispanic White	Rectum	Malignant	Rectum	Rectum	8.3 Other malignant	Unclassified	XId malignant melanomas	5. All Other Cancer Types	Rectum	C20.9-Rectum, NOS	209	8720	Malignant	Unknown	Blank(s)	Blank(s)	Not a paired site	Positive histology	8720/3: Malignant melanoma, NOS	8720/3: Malignant melanoma, NOS	8720-8799: nevi and melanomas	XId Malignant melanomas	Rectum	XI(d) Malignant melanomas	XI(d) Malignant melanomas	Not Brain	Blank(s)	Blank(s)	Blank(s)	37 MALIGNANT MELANOMA OF MUCOSA AND EXTRACUTANEOUS	7.1 Melanoma	Blank(s)	Unknown/unstaged	Blank(s)	Unstaged	Blank(s)	Blank(s)	Blank(s)	Blank(s)	Blank(s)	Blank(s)	Blank(s)	Blank(s)	Blank(s)
60-64 years	Male	2003	White	Non-Spanish-Hispanic-Latino	Non-Hispanic White	Rectum	Malignant	Rectum	Rectum	8.3 Other malignant	Unclassified	XId malignant melanomas	5. All Other Cancer Types	Rectum	C20.9-Rectum, NOS	209	8744	Malignant	Unknown	Blank(s)	Blank(s)	Not a paired site	Positive histology	8744/3: Acral lentiginous melanoma, malignant	8744/3: Acral lentiginous melanoma, malignant	8720-8799: nevi and melanomas	XId Malignant melanomas	Rectum	XI(d) Malignant melanomas	XI(d) Malignant melanomas	Not Brain	Blank(s)	Blank(s)	Blank(s)	37 MALIGNANT MELANOMA OF MUCOSA AND EXTRACUTANEOUS	7.1 Melanoma	Blank(s)	Regional	Blank(s)	Regional	Blank(s)	Blank(s)	Blank(s)	Blank(s)	Blank(s)	Blank(s)	Blank(s)	Blank(s)	Blank(s)
55-59 years	Male	2009	White	Non-Spanish-Hispanic-Latino	Non-Hispanic White	Rectum	Malignant	Rectum	Rectum	8.2 Nodular melanoma	Unclassified	XId malignant melanomas	5. All Other Cancer Types	Rectum	C20.9-Rectum, NOS	209	8721	Malignant	Unknown	Blank(s)	Blank(s)	Not a paired site	Positive histology	8721/3: Nodular melanoma	8721/3: Nodular melanoma	8720-8799: nevi and melanomas	XId Malignant melanomas	Rectum	XI(d) Malignant melanomas	XI(d) Malignant melanomas	Not Brain	Blank(s)	Blank(s)	Blank(s)	37 MALIGNANT MELANOMA OF MUCOSA AND EXTRACUTANEOUS	7.1 Melanoma	Distant	Distant	Distant site(s)/node(s) involved	Distant	Blank(s)	Blank(s)	Blank(s)	Blank(s)	Blank(s)	Blank(s)	Blank(s)	Blank(s)	Blank(s)
60-64 years	Female	2009	Black	Non-Spanish-Hispanic-Latino	Non-Hispanic Black	Rectum	Malignant	Rectum	Rectum	8.3 Other malignant	Unclassified	XId malignant melanomas	5. All Other Cancer Types	Rectum	C20.9-Rectum, NOS	209	8720	Malignant	Unknown	Blank(s)	Blank(s)	Not a paired site	Positive histology	8720/3: Malignant melanoma, NOS	8720/3: Malignant melanoma, NOS	8720-8799: nevi and melanomas	XId Malignant melanomas	Rectum	XI(d) Malignant melanomas	XI(d) Malignant melanomas	Not Brain	Blank(s)	Blank(s)	Blank(s)	37 MALIGNANT MELANOMA OF MUCOSA AND EXTRACUTANEOUS	7.1 Melanoma	Localized	Localized	Localized only	Localized	Blank(s)	Blank(s)	Blank(s)	Blank(s)	Blank(s)	Blank(s)	Blank(s)	Blank(s)	Blank(s)
65-69 years	Female	2009	White	Non-Spanish-Hispanic-Latino	Non-Hispanic White	Rectum	Malignant	Rectum	Rectum	8.3 Other malignant	Unclassified	XId malignant melanomas	5. All Other Cancer Types	Rectum	C20.9-Rectum, NOS	209	8720	Malignant	Unknown	Blank(s)	Blank(s)	Not a paired site	Positive histology	8720/3: Malignant melanoma, NOS	8720/3: Malignant melanoma, NOS	8720-8799: nevi and melanomas	XId Malignant melanomas	Rectum	XI(d) Malignant melanomas	XI(d) Malignant melanomas	Not Brain	Blank(s)	Blank(s)	Blank(s)	37 MALIGNANT MELANOMA OF MUCOSA AND EXTRACUTANEOUS	7.1 Melanoma	Regional	Regional	Regional lymph nodes involved only	Regional	Blank(s)	Blank(s)	Blank(s)	Blank(s)	Blank(s)	Blank(s)	Blank(s)	Blank(s)	Blank(s)
65-69 years	Male	2013	White	Non-Spanish-Hispanic-Latino	Non-Hispanic White	Rectum	Malignant	Rectum	Rectum	8.3 Other malignant	Unclassified	XId malignant melanomas	5. All Other Cancer Types	Rectum	C20.9-Rectum, NOS	209	8770	Malignant	Undifferentiated; anaplastic; Grade IV	Blank(s)	Blank(s)	Not a paired site	Positive histology	8770/3: Mixed epithelioid and spindle cell melanoma	8770/3: Mixed epithelioid and spindle cell melanoma	8720-8799: nevi and melanomas	XId Malignant melanomas	Rectum	XI(d) Malignant melanomas	XI(d) Malignant melanomas	Not Brain	Blank(s)	Blank(s)	Colon and Rectum	37 MALIGNANT MELANOMA OF MUCOSA AND EXTRACUTANEOUS	7.1 Melanoma	Unknown/unstaged	Unknown/unstaged	Unknown/unstaged/unspecified/DCO	Unstaged	Blank(s)	Blank(s)	Blank(s)	Blank(s)	NA	NA	NA	NA	Blank(s)
40-44 years	Male	2015	White	Non-Spanish-Hispanic-Latino	Non-Hispanic White	Rectum	Malignant	Rectum	Rectum	8.3 Other malignant	Unclassified	XId malignant melanomas	5. All Other Cancer Types	Rectum	C20.9-Rectum, NOS	209	8720	Malignant	Unknown	Blank(s)	Blank(s)	Not a paired site	Positive histology	8720/3: Malignant melanoma, NOS	8720/3: Malignant melanoma, NOS	8720-8799: nevi and melanomas	XId Malignant melanomas	Rectum	XI(d) Malignant melanomas	XI(d) Malignant melanomas	Not Brain	Blank(s)	Blank(s)	Colon and Rectum	37 MALIGNANT MELANOMA OF MUCOSA AND EXTRACUTANEOUS	7.1 Melanoma	Unknown/unstaged	Unknown/unstaged	Unknown/unstaged/unspecified/DCO	Unstaged	Blank(s)	Blank(s)	Blank(s)	Blank(s)	NA	NA	NA	NA	Blank(s)
30-34 years	Male	2017	White	Non-Spanish-Hispanic-Latino	Non-Hispanic White	Rectum	Malignant	Rectum	Rectum	8.3 Other malignant	Unclassified	XId malignant melanomas	5. All Other Cancer Types	Rectum	C20.9-Rectum, NOS	209	8720	Malignant	Unknown	Blank(s)	Blank(s)	Not a paired site	Positive histology	8720/3: Malignant melanoma, NOS	8720/3: Malignant melanoma, NOS	8720-8799: nevi and melanomas	XId Malignant melanomas	Rectum	XI(d) Malignant melanomas	XI(d) Malignant melanomas	Not Brain	Blank(s)	Blank(s)	Colon and Rectum	37 MALIGNANT MELANOMA OF MUCOSA AND EXTRACUTANEOUS	7.1 Melanoma	Distant	Distant	Distant site(s)/node(s) involved	Blank(s)	Blank(s)	Blank(s)	Blank(s)	Blank(s)	Blank(s)	Blank(s)	Blank(s)	Blank(s)	Not applicable
75-79 years	Female	2004	White	Non-Spanish-Hispanic-Latino	Non-Hispanic White	Rectum	Malignant	Rectum	Rectum	8.3 Other malignant	Unclassified	XId malignant melanomas	5. All Other Cancer Types	Rectum	C20.9-Rectum, NOS	209	8720	Malignant	Poorly differentiated; Grade III	Blank(s)	Blank(s)	Not a paired site	Positive histology	8720/3: Malignant melanoma, NOS	8720/3: Malignant melanoma, NOS	8720-8799: nevi and melanomas	XId Malignant melanomas	Rectum	XI(d) Malignant melanomas	XI(d) Malignant melanomas	Not Brain	Blank(s)	Blank(s)	Blank(s)	37 MALIGNANT MELANOMA OF MUCOSA AND EXTRACUTANEOUS	7.1 Melanoma	Localized	Localized	Localized only	Localized	Blank(s)	Blank(s)	Blank(s)	Blank(s)	Blank(s)	Blank(s)	Blank(s)	Blank(s)	Blank(s)
75-79 years	Male	2006	Black	Non-Spanish-Hispanic-Latino	Non-Hispanic Black	Rectum	Malignant	Rectum	Rectum	8.2 Nodular melanoma	Unclassified	XId malignant melanomas	5. All Other Cancer Types	Rectum	C20.9-Rectum, NOS	209	8721	Malignant	Unknown	Blank(s)	Blank(s)	Not a paired site	Positive histology	8721/3: Nodular melanoma	8721/3: Nodular melanoma	8720-8799: nevi and melanomas	XId Malignant melanomas	Rectum	XI(d) Malignant melanomas	XI(d) Malignant melanomas	Not Brain	Blank(s)	Blank(s)	Blank(s)	37 MALIGNANT MELANOMA OF MUCOSA AND EXTRACUTANEOUS	7.1 Melanoma	Regional	Regional	Regional lymph nodes involved only	Regional	Blank(s)	Blank(s)	Blank(s)	Blank(s)	Blank(s)	Blank(s)	Blank(s)	Blank(s)	Blank(s)
80-84 years	Male	2000	White	Non-Spanish-Hispanic-Latino	Non-Hispanic White	Rectum	Malignant	Rectum	Rectum	8.3 Other malignant	Unclassified	XId malignant melanomas	5. All Other Cancer Types	Rectum	C20.9-Rectum, NOS	209	8720	Malignant	Poorly differentiated; Grade III	Blank(s)	Blank(s)	Not a paired site	Positive histology	8720/3: Malignant melanoma, NOS	8720/3: Malignant melanoma, NOS	8720-8799: nevi and melanomas	XId Malignant melanomas	Rectum	XI(d) Malignant melanomas	XI(d) Malignant melanomas	Not Brain	Blank(s)	Blank(s)	Blank(s)	37 MALIGNANT MELANOMA OF MUCOSA AND EXTRACUTANEOUS	7.1 Melanoma	Blank(s)	Localized	Blank(s)	Localized	Blank(s)	Blank(s)	Blank(s)	Blank(s)	Blank(s)	Blank(s)	Blank(s)	Blank(s)	Blank(s)
80-84 years	Male	2000	White	Non-Spanish-Hispanic-Latino	Non-Hispanic White	Rectum	Malignant	Rectum	Rectum	8.3 Other malignant	Unclassified	XId malignant melanomas	5. All Other Cancer Types	Rectum	C20.9-Rectum, NOS	209	8720	Malignant	Poorly differentiated; Grade III	Blank(s)	Blank(s)	Not a paired site	Positive histology	8720/3: Malignant melanoma, NOS	8720/3: Malignant melanoma, NOS	8720-8799: nevi and melanomas	XId Malignant melanomas	Rectum	XI(d) Malignant melanomas	XI(d) Malignant melanomas	Not Brain	Blank(s)	Blank(s)	Blank(s)	37 MALIGNANT MELANOMA OF MUCOSA AND EXTRACUTANEOUS	7.1 Melanoma	Blank(s)	Localized	Blank(s)	Localized	Blank(s)	Blank(s)	Blank(s)	Blank(s)	Blank(s)	Blank(s)	Blank(s)	Blank(s)	Blank(s)
50-54 years	Female	2008	White	Non-Spanish-Hispanic-Latino	Non-Hispanic White	Rectum	Malignant	Rectum	Rectum	8.3 Other malignant	Unclassified	XId malignant melanomas	5. All Other Cancer Types	Rectum	C20.9-Rectum, NOS	209	8730	Malignant	Unknown	Blank(s)	Blank(s)	Not a paired site	Positive histology	8730/3: Amelanotic melanoma	8730/3: Amelanotic melanoma	8720-8799: nevi and melanomas	XId Malignant melanomas	Rectum	XI(d) Malignant melanomas	XI(d) Malignant melanomas	Not Brain	Blank(s)	Blank(s)	Blank(s)	37 MALIGNANT MELANOMA OF MUCOSA AND EXTRACUTANEOUS	7.1 Melanoma	Distant	Distant	Distant site(s)/node(s) involved	Regional	Blank(s)	Blank(s)	Blank(s)	Blank(s)	Blank(s)	Blank(s)	Blank(s)	Blank(s)	Blank(s)
70-74 years	Female	2002	White	Non-Spanish-Hispanic-Latino	Non-Hispanic White	Rectum	Malignant	Rectum	Rectum	8.3 Other malignant	Unclassified	XId malignant melanomas	5. All Other Cancer Types	Rectum	C20.9-Rectum, NOS	209	8720	Malignant	Undifferentiated; anaplastic; Grade IV	Blank(s)	Blank(s)	Not a paired site	Positive histology	8720/3: Malignant melanoma, NOS	8720/3: Malignant melanoma, NOS	8720-8799: nevi and melanomas	XId Malignant melanomas	Rectum	XI(d) Malignant melanomas	XI(d) Malignant melanomas	Not Brain	Blank(s)	Blank(s)	Blank(s)	37 MALIGNANT MELANOMA OF MUCOSA AND EXTRACUTANEOUS	7.1 Melanoma	Blank(s)	Regional	Blank(s)	Regional	Blank(s)	Blank(s)	Blank(s)	Blank(s)	Blank(s)	Blank(s)	Blank(s)	Blank(s)	Blank(s)
65-69 years	Male	2004	Asian or Pacific Islander	Non-Spanish-Hispanic-Latino	Non-Hispanic Asian or Pacific Islander	Rectum	Malignant	Rectum	Rectum	8.3 Other malignant	Unclassified	XId malignant melanomas	5. All Other Cancer Types	Rectum	C20.9-Rectum, NOS	209	8772	Malignant	Undifferentiated; anaplastic; Grade IV	Blank(s)	Blank(s)	Not a paired site	Positive histology	8772/3: Spindle cell melanoma, NOS	8772/3: Spindle cell melanoma, NOS	8720-8799: nevi and melanomas	XId Malignant melanomas	Rectum	XI(d) Malignant melanomas	XI(d) Malignant melanomas	Not Brain	Blank(s)	Blank(s)	Blank(s)	37 MALIGNANT MELANOMA OF MUCOSA AND EXTRACUTANEOUS	7.1 Melanoma	Localized	Localized	Localized only	Localized	Blank(s)	Blank(s)	Blank(s)	Blank(s)	Blank(s)	Blank(s)	Blank(s)	Blank(s)	Blank(s)
40-44 years	Male	2005	White	Non-Spanish-Hispanic-Latino	Non-Hispanic White	Rectum	Malignant	Rectum	Rectum	8.3 Other malignant	Unclassified	XId malignant melanomas	5. All Other Cancer Types	Rectum	C20.9-Rectum, NOS	209	8720	Malignant	Undifferentiated; anaplastic; Grade IV	Blank(s)	Blank(s)	Not a paired site	Positive histology	8720/3: Malignant melanoma, NOS	8720/3: Malignant melanoma, NOS	8720-8799: nevi and melanomas	XId Malignant melanomas	Rectum	XI(d) Malignant melanomas	XI(d) Malignant melanomas	Not Brain	Blank(s)	Blank(s)	Blank(s)	37 MALIGNANT MELANOMA OF MUCOSA AND EXTRACUTANEOUS	7.1 Melanoma	Regional	Regional	Regional by direct extension only	Regional	Blank(s)	Blank(s)	Blank(s)	Blank(s)	Blank(s)	Blank(s)	Blank(s)	Blank(s)	Blank(s)
65-69 years	Male	2005	Black	Non-Spanish-Hispanic-Latino	Non-Hispanic Black	Rectum	Malignant	Rectum	Rectum	8.3 Other malignant	Unclassified	XId malignant melanomas	5. All Other Cancer Types	Rectum	C20.9-Rectum, NOS	209	8720	Malignant	Unknown	Blank(s)	Blank(s)	Not a paired site	Positive histology	8720/3: Malignant melanoma, NOS	8720/3: Malignant melanoma, NOS	8720-8799: nevi and melanomas	XId Malignant melanomas	Rectum	XI(d) Malignant melanomas	XI(d) Malignant melanomas	Not Brain	Blank(s)	Blank(s)	Blank(s)	37 MALIGNANT MELANOMA OF MUCOSA AND EXTRACUTANEOUS	7.1 Melanoma	Localized	Localized	Localized only	Localized	Blank(s)	Blank(s)	Blank(s)	Blank(s)	Blank(s)	Blank(s)	Blank(s)	Blank(s)	Blank(s)
85+ years	Female	2016	White	Spanish-Hispanic-Latino	Hispanic (All Races)	Rectum	Malignant	Rectum	Rectum	8.3 Other malignant	Unclassified	XId malignant melanomas	5. All Other Cancer Types	Rectum	C20.9-Rectum, NOS	209	8720	Malignant	Unknown	Blank(s)	Blank(s)	Not a paired site	Positive histology	8720/3: Malignant melanoma, NOS	8720/3: Malignant melanoma, NOS	8720-8799: nevi and melanomas	XId Malignant melanomas	Rectum	XI(d) Malignant melanomas	XI(d) Malignant melanomas	Not Brain	Blank(s)	Blank(s)	Colon and Rectum	37 MALIGNANT MELANOMA OF MUCOSA AND EXTRACUTANEOUS	7.1 Melanoma	Unknown/unstaged	Unknown/unstaged	Unknown/unstaged/unspecified/DCO	Blank(s)	Blank(s)	Blank(s)	Blank(s)	Blank(s)	Blank(s)	Blank(s)	Blank(s)	Blank(s)	Not applicable
45-49 years	Female	2007	Black	Non-Spanish-Hispanic-Latino	Non-Hispanic Black	Rectum	Malignant	Rectum	Rectum	8.3 Other malignant	Unclassified	XId malignant melanomas	5. All Other Cancer Types	Rectum	C20.9-Rectum, NOS	209	8720	Malignant	Poorly differentiated; Grade III	Blank(s)	Blank(s)	Not a paired site	Positive histology	8720/3: Malignant melanoma, NOS	8720/3: Malignant melanoma, NOS	8720-8799: nevi and melanomas	XId Malignant melanomas	Rectum	XI(d) Malignant melanomas	XI(d) Malignant melanomas	Not Brain	Blank(s)	Blank(s)	Blank(s)	37 MALIGNANT MELANOMA OF MUCOSA AND EXTRACUTANEOUS	7.1 Melanoma	Distant	Distant	Distant site(s)/node(s) involved	Distant	Blank(s)	Blank(s)	Blank(s)	Blank(s)	Blank(s)	Blank(s)	Blank(s)	Blank(s)	Blank(s)
70-74 years	Male	2009	White	Non-Spanish-Hispanic-Latino	Non-Hispanic White	Rectum	Malignant	Rectum	Rectum	8.3 Other malignant	Unclassified	XId malignant melanomas	5. All Other Cancer Types	Rectum	C20.9-Rectum, NOS	209	8720	Malignant	Unknown	Blank(s)	Blank(s)	Not a paired site	Positive histology	8720/3: Malignant melanoma, NOS	8720/3: Malignant melanoma, NOS	8720-8799: nevi and melanomas	XId Malignant melanomas	Rectum	XI(d) Malignant melanomas	XI(d) Malignant melanomas	Not Brain	Blank(s)	Blank(s)	Blank(s)	37 MALIGNANT MELANOMA OF MUCOSA AND EXTRACUTANEOUS	7.1 Melanoma	Regional	Regional	Regional by direct extension only	Regional	Blank(s)	Blank(s)	Blank(s)	Blank(s)	Blank(s)	Blank(s)	Blank(s)	Blank(s)	Blank(s)
80-84 years	Male	2010	White	Non-Spanish-Hispanic-Latino	Non-Hispanic White	Rectum	Malignant	Rectum	Rectum	8.3 Other malignant	Unclassified	XId malignant melanomas	5. All Other Cancer Types	Rectum	C20.9-Rectum, NOS	209	8720	Malignant	Unknown	Blank(s)	Blank(s)	Not a paired site	Positive histology	8720/3: Malignant melanoma, NOS	8720/3: Malignant melanoma, NOS	8720-8799: nevi and melanomas	XId Malignant melanomas	Rectum	XI(d) Malignant melanomas	XI(d) Malignant melanomas	Not Brain	Blank(s)	Blank(s)	Colon and Rectum	37 MALIGNANT MELANOMA OF MUCOSA AND EXTRACUTANEOUS	7.1 Melanoma	Localized	Localized	Localized only	Localized	Blank(s)	Blank(s)	Blank(s)	Blank(s)	NA	NA	NA	NA	Blank(s)
75-79 years	Female	2011	White	Non-Spanish-Hispanic-Latino	Non-Hispanic White	Rectum	Malignant	Rectum	Rectum	8.3 Other malignant	Unclassified	XId malignant melanomas	5. All Other Cancer Types	Rectum	C20.9-Rectum, NOS	209	8720	Malignant	Unknown	Blank(s)	Blank(s)	Not a paired site	Positive histology	8720/3: Malignant melanoma, NOS	8720/3: Malignant melanoma, NOS	8720-8799: nevi and melanomas	XId Malignant melanomas	Rectum	XI(d) Malignant melanomas	XI(d) Malignant melanomas	Not Brain	Blank(s)	Blank(s)	Colon and Rectum	37 MALIGNANT MELANOMA OF MUCOSA AND EXTRACUTANEOUS	7.1 Melanoma	Distant	Distant	Distant site(s)/node(s) involved	Distant	Blank(s)	Blank(s)	Blank(s)	Blank(s)	NA	NA	NA	NA	Blank(s)
50-54 years	Female	2013	White	Non-Spanish-Hispanic-Latino	Non-Hispanic White	Rectum	Malignant	Rectum	Rectum	8.2 Nodular melanoma	Unclassified	XId malignant melanomas	5. All Other Cancer Types	Rectum	C20.9-Rectum, NOS	209	8721	Malignant	Unknown	Blank(s)	Blank(s)	Not a paired site	Positive histology	8721/3: Nodular melanoma	8721/3: Nodular melanoma	8720-8799: nevi and melanomas	XId Malignant melanomas	Rectum	XI(d) Malignant melanomas	XI(d) Malignant melanomas	Not Brain	Blank(s)	Blank(s)	Colon and Rectum	37 MALIGNANT MELANOMA OF MUCOSA AND EXTRACUTANEOUS	7.1 Melanoma	Distant	Distant	Distant site(s)/node(s) involved	Distant	Blank(s)	Blank(s)	Blank(s)	Blank(s)	NA	NA	NA	NA	Blank(s)
45-49 years	Male	2012	Asian or Pacific Islander	Non-Spanish-Hispanic-Latino	Non-Hispanic Asian or Pacific Islander	Rectum	Malignant	Rectum	Rectum	8.3 Other malignant	Unclassified	XId malignant melanomas	5. All Other Cancer Types	Rectum	C20.9-Rectum, NOS	209	8720	Malignant	Unknown	Blank(s)	Blank(s)	Not a paired site	Positive histology	8720/3: Malignant melanoma, NOS	8720/3: Malignant melanoma, NOS	8720-8799: nevi and melanomas	XId Malignant melanomas	Rectum	XI(d) Malignant melanomas	XI(d) Malignant melanomas	Not Brain	Blank(s)	Blank(s)	Colon and Rectum	37 MALIGNANT MELANOMA OF MUCOSA AND EXTRACUTANEOUS	7.1 Melanoma	Localized	Localized	Localized only	Localized	Blank(s)	Blank(s)	Blank(s)	Blank(s)	NA	NA	NA	NA	Blank(s)
65-69 years	Female	2014	White	Non-Spanish-Hispanic-Latino	Non-Hispanic White	Rectum	Malignant	Rectum	Rectum	8.3 Other malignant	Unclassified	XId malignant melanomas	5. All Other Cancer Types	Rectum	C20.9-Rectum, NOS	209	8720	Malignant	Unknown	Blank(s)	Blank(s)	Not a paired site	Positive histology	8720/3: Malignant melanoma, NOS	8720/3: Malignant melanoma, NOS	8720-8799: nevi and melanomas	XId Malignant melanomas	Rectum	XI(d) Malignant melanomas	XI(d) Malignant melanomas	Not Brain	Blank(s)	Blank(s)	Colon and Rectum	37 MALIGNANT MELANOMA OF MUCOSA AND EXTRACUTANEOUS	7.1 Melanoma	Regional	Regional	Regional by both direct extension and lymph node involvement	Regional	Blank(s)	Blank(s)	Blank(s)	Blank(s)	NA	NA	NA	NA	Blank(s)
70-74 years	Male	2017	White	Non-Spanish-Hispanic-Latino	Non-Hispanic White	Rectum	Malignant	Rectum	Rectum	8.3 Other malignant	Unclassified	XId malignant melanomas	5. All Other Cancer Types	Rectum	C20.9-Rectum, NOS	209	8720	Malignant	Unknown	Blank(s)	Blank(s)	Not a paired site	Positive histology	8720/3: Malignant melanoma, NOS	8720/3: Malignant melanoma, NOS	8720-8799: nevi and melanomas	XId Malignant melanomas	Rectum	XI(d) Malignant melanomas	XI(d) Malignant melanomas	Not Brain	Blank(s)	Blank(s)	Colon and Rectum	37 MALIGNANT MELANOMA OF MUCOSA AND EXTRACUTANEOUS	7.1 Melanoma	Regional	Regional	Regional by both direct extension and lymph node involvement	Blank(s)	Blank(s)	Blank(s)	Blank(s)	Blank(s)	Blank(s)	Blank(s)	Blank(s)	Blank(s)	Not applicable
65-69 years	Male	2000	White	Non-Spanish-Hispanic-Latino	Non-Hispanic White	Rectum	Malignant	Rectum	Rectum	8.3 Other malignant	Unclassified	XId malignant melanomas	5. All Other Cancer Types	Rectum	C20.9-Rectum, NOS	209	8720	Malignant	Unknown	Blank(s)	Blank(s)	Not a paired site	Positive histology	8720/3: Malignant melanoma, NOS	8720/3: Malignant melanoma, NOS	8720-8799: nevi and melanomas	XId Malignant melanomas	Rectum	XI(d) Malignant melanomas	XI(d) Malignant melanomas	Not Brain	Blank(s)	Blank(s)	Blank(s)	37 MALIGNANT MELANOMA OF MUCOSA AND EXTRACUTANEOUS	7.1 Melanoma	Blank(s)	Distant	Blank(s)	Distant	Blank(s)	Blank(s)	Blank(s)	Blank(s)	Blank(s)	Blank(s)	Blank(s)	Blank(s)	Blank(s)
85+ years	Female	2000	White	Non-Spanish-Hispanic-Latino	Non-Hispanic White	Rectum	Malignant	Rectum	Rectum	8.3 Other malignant	Unclassified	XId malignant melanomas	5. All Other Cancer Types	Rectum	C20.9-Rectum, NOS	209	8720	Malignant	Unknown	Blank(s)	Blank(s)	Not a paired site	Positive histology	8720/3: Malignant melanoma, NOS	8720/3: Malignant melanoma, NOS	8720-8799: nevi and melanomas	XId Malignant melanomas	Rectum	XI(d) Malignant melanomas	XI(d) Malignant melanomas	Not Brain	Blank(s)	Blank(s)	Blank(s)	37 MALIGNANT MELANOMA OF MUCOSA AND EXTRACUTANEOUS	7.1 Melanoma	Blank(s)	Localized	Blank(s)	Localized	Blank(s)	Blank(s)	Blank(s)	Blank(s)	Blank(s)	Blank(s)	Blank(s)	Blank(s)	Blank(s)
60-64 years	Male	2000	Asian or Pacific Islander	Spanish-Hispanic-Latino	Hispanic (All Races)	Rectum	Malignant	Rectum	Rectum	8.3 Other malignant	Unclassified	XId malignant melanomas	5. All Other Cancer Types	Rectum	C20.9-Rectum, NOS	209	8720	Malignant	Unknown	Blank(s)	Blank(s)	Not a paired site	Positive histology	8720/3: Malignant melanoma, NOS	8720/3: Malignant melanoma, NOS	8720-8799: nevi and melanomas	XId Malignant melanomas	Rectum	XI(d) Malignant melanomas	XI(d) Malignant melanomas	Not Brain	Blank(s)	Blank(s)	Blank(s)	37 MALIGNANT MELANOMA OF MUCOSA AND EXTRACUTANEOUS	7.1 Melanoma	Blank(s)	Regional	Blank(s)	Regional	Blank(s)	Blank(s)	Blank(s)	Blank(s)	Blank(s)	Blank(s)	Blank(s)	Blank(s)	Blank(s)
85+ years	Female	2002	White	Non-Spanish-Hispanic-Latino	Non-Hispanic White	Rectosigmoid Junction	Malignant	Rectum	Rectum	8.3 Other malignant	Unclassified	XId malignant melanomas	5. All Other Cancer Types	Rectum	C19.9-Rectosigmoid junction	199	8720	Malignant	Unknown	Blank(s)	Blank(s)	Not a paired site	Positive histology	8720/3: Malignant melanoma, NOS	8720/3: Malignant melanoma, NOS	8720-8799: nevi and melanomas	XId Malignant melanomas	Rectosigmoid Junction	XI(d) Malignant melanomas	XI(d) Malignant melanomas	Not Brain	Blank(s)	Blank(s)	Blank(s)	37 MALIGNANT MELANOMA OF MUCOSA AND EXTRACUTANEOUS	7.1 Melanoma	Blank(s)	Localized	Blank(s)	Localized	Blank(s)	Blank(s)	Blank(s)	Blank(s)	Blank(s)	Blank(s)	Blank(s)	Blank(s)	Blank(s)
50-54 years	Male	2001	White	Non-Spanish-Hispanic-Latino	Non-Hispanic White	Rectum	Malignant	Rectum	Rectum	8.3 Other malignant	Unclassified	XId malignant melanomas	5. All Other Cancer Types	Rectum	C20.9-Rectum, NOS	209	8720	Malignant	Unknown	Blank(s)	Blank(s)	Not a paired site	Positive histology	8720/3: Malignant melanoma, NOS	8720/3: Malignant melanoma, NOS	8720-8799: nevi and melanomas	XId Malignant melanomas	Rectum	XI(d) Malignant melanomas	XI(d) Malignant melanomas	Not Brain	Blank(s)	Blank(s)	Blank(s)	37 MALIGNANT MELANOMA OF MUCOSA AND EXTRACUTANEOUS	7.1 Melanoma	Blank(s)	Localized	Blank(s)	Localized	Blank(s)	Blank(s)	Blank(s)	Blank(s)	Blank(s)	Blank(s)	Blank(s)	Blank(s)	Blank(s)
80-84 years	Female	2003	Black	Non-Spanish-Hispanic-Latino	Non-Hispanic Black	Rectum	Malignant	Rectum	Rectum	8.3 Other malignant	Unclassified	XId malignant melanomas	5. All Other Cancer Types	Rectum	C20.9-Rectum, NOS	209	8720	Malignant	Unknown	Blank(s)	Blank(s)	Not a paired site	Positive histology	8720/3: Malignant melanoma, NOS	8720/3: Malignant melanoma, NOS	8720-8799: nevi and melanomas	XId Malignant melanomas	Rectum	XI(d) Malignant melanomas	XI(d) Malignant melanomas	Not Brain	Blank(s)	Blank(s)	Blank(s)	37 MALIGNANT MELANOMA OF MUCOSA AND EXTRACUTANEOUS	7.1 Melanoma	Blank(s)	Regional	Blank(s)	Regional	Blank(s)	Blank(s)	Blank(s)	Blank(s)	Blank(s)	Blank(s)	Blank(s)	Blank(s)	Blank(s)
40-44 years	Male	2002	Black	Non-Spanish-Hispanic-Latino	Non-Hispanic Black	Rectum	Malignant	Rectum	Rectum	8.3 Other malignant	Unclassified	XId malignant melanomas	5. All Other Cancer Types	Rectum	C20.9-Rectum, NOS	209	8720	Malignant	Unknown	Blank(s)	Blank(s)	Not a paired site	Positive histology	8720/3: Malignant melanoma, NOS	8720/3: Malignant melanoma, NOS	8720-8799: nevi and melanomas	XId Malignant melanomas	Rectum	XI(d) Malignant melanomas	XI(d) Malignant melanomas	Not Brain	Blank(s)	Blank(s)	Blank(s)	37 MALIGNANT MELANOMA OF MUCOSA AND EXTRACUTANEOUS	7.1 Melanoma	Blank(s)	Unknown/unstaged	Blank(s)	Unstaged	Blank(s)	Blank(s)	Blank(s)	Blank(s)	Blank(s)	Blank(s)	Blank(s)	Blank(s)	Blank(s)
85+ years	Female	2004	White	Non-Spanish-Hispanic-Latino	Non-Hispanic White	Rectum	Malignant	Rectum	Rectum	8.3 Other malignant	Unclassified	XId malignant melanomas	5. All Other Cancer Types	Rectum	C20.9-Rectum, NOS	209	8720	Malignant	Undifferentiated; anaplastic; Grade IV	Blank(s)	Blank(s)	Not a paired site	Positive histology	8720/3: Malignant melanoma, NOS	8720/3: Malignant melanoma, NOS	8720-8799: nevi and melanomas	XId Malignant melanomas	Rectum	XI(d) Malignant melanomas	XI(d) Malignant melanomas	Not Brain	Blank(s)	Blank(s)	Blank(s)	37 MALIGNANT MELANOMA OF MUCOSA AND EXTRACUTANEOUS	7.1 Melanoma	Regional	Regional	Regional by both direct extension and lymph node involvement	Regional	Blank(s)	Blank(s)	Blank(s)	Blank(s)	Blank(s)	Blank(s)	Blank(s)	Blank(s)	Blank(s)
40-44 years	Male	2005	Black	Non-Spanish-Hispanic-Latino	Non-Hispanic Black	Rectum	Malignant	Rectum	Rectum	8.3 Other malignant	Unclassified	XId malignant melanomas	5. All Other Cancer Types	Rectum	C20.9-Rectum, NOS	209	8720	Malignant	Unknown	Blank(s)	Blank(s)	Not a paired site	Positive histology	8720/3: Malignant melanoma, NOS	8720/3: Malignant melanoma, NOS	8720-8799: nevi and melanomas	XId Malignant melanomas	Rectum	XI(d) Malignant melanomas	XI(d) Malignant melanomas	Not Brain	Blank(s)	Blank(s)	Blank(s)	37 MALIGNANT MELANOMA OF MUCOSA AND EXTRACUTANEOUS	7.1 Melanoma	Localized	Localized	Localized only	Localized	Blank(s)	Blank(s)	Blank(s)	Blank(s)	Blank(s)	Blank(s)	Blank(s)	Blank(s)	Blank(s)
80-84 years	Female	2006	White	Non-Spanish-Hispanic-Latino	Non-Hispanic White	Rectum	Malignant	Rectum	Rectum	8.3 Other malignant	Unclassified	XId malignant melanomas	5. All Other Cancer Types	Rectum	C20.9-Rectum, NOS	209	8720	Malignant	Unknown	Blank(s)	Blank(s)	Not a paired site	Positive histology	8720/3: Malignant melanoma, NOS	8720/3: Malignant melanoma, NOS	8720-8799: nevi and melanomas	XId Malignant melanomas	Rectum	XI(d) Malignant melanomas	XI(d) Malignant melanomas	Not Brain	Blank(s)	Blank(s)	Blank(s)	37 MALIGNANT MELANOMA OF MUCOSA AND EXTRACUTANEOUS	7.1 Melanoma	Localized	Localized	Localized only	Localized	Blank(s)	Blank(s)	Blank(s)	Blank(s)	Blank(s)	Blank(s)	Blank(s)	Blank(s)	Blank(s)
70-74 years	Male	2006	White	Non-Spanish-Hispanic-Latino	Non-Hispanic White	Rectum	Malignant	Rectum	Rectum	8.3 Other malignant	Unclassified	XId malignant melanomas	5. All Other Cancer Types	Rectum	C20.9-Rectum, NOS	209	8772	Malignant	Unknown	Blank(s)	Blank(s)	Not a paired site	Positive histology	8772/3: Spindle cell melanoma, NOS	8772/3: Spindle cell melanoma, NOS	8720-8799: nevi and melanomas	XId Malignant melanomas	Rectum	XI(d) Malignant melanomas	XI(d) Malignant melanomas	Not Brain	Blank(s)	Blank(s)	Blank(s)	37 MALIGNANT MELANOMA OF MUCOSA AND EXTRACUTANEOUS	7.1 Melanoma	Localized	Localized	Localized only	Localized	Blank(s)	Blank(s)	Blank(s)	Blank(s)	Blank(s)	Blank(s)	Blank(s)	Blank(s)	Blank(s)
60-64 years	Female	2008	White	Non-Spanish-Hispanic-Latino	Non-Hispanic White	Rectosigmoid Junction	Malignant	Rectum	Rectum	8.3 Other malignant	Unclassified	XId malignant melanomas	5. All Other Cancer Types	Rectum	C19.9-Rectosigmoid junction	199	8720	Malignant	Unknown	Blank(s)	Blank(s)	Not a paired site	Positive histology	8720/3: Malignant melanoma, NOS	8720/3: Malignant melanoma, NOS	8720-8799: nevi and melanomas	XId Malignant melanomas	Rectosigmoid Junction	XI(d) Malignant melanomas	XI(d) Malignant melanomas	Not Brain	Blank(s)	Blank(s)	Blank(s)	37 MALIGNANT MELANOMA OF MUCOSA AND EXTRACUTANEOUS	7.1 Melanoma	Unknown/unstaged	Unknown/unstaged	Unknown/unstaged/unspecified/DCO	Unstaged	Blank(s)	Blank(s)	Blank(s)	Blank(s)	Blank(s)	Blank(s)	Blank(s)	Blank(s)	Blank(s)
75-79 years	Male	2009	White	Non-Spanish-Hispanic-Latino	Non-Hispanic White	Rectum	Malignant	Rectum	Rectum	8.3 Other malignant	Unclassified	XId malignant melanomas	5. All Other Cancer Types	Rectum	C20.9-Rectum, NOS	209	8720	Malignant	Unknown	Blank(s)	Blank(s)	Not a paired site	Positive histology	8720/3: Malignant melanoma, NOS	8720/3: Malignant melanoma, NOS	8720-8799: nevi and melanomas	XId Malignant melanomas	Rectum	XI(d) Malignant melanomas	XI(d) Malignant melanomas	Not Brain	Blank(s)	Blank(s)	Blank(s)	37 MALIGNANT MELANOMA OF MUCOSA AND EXTRACUTANEOUS	7.1 Melanoma	Localized	Localized	Localized only	Localized	Blank(s)	Blank(s)	Blank(s)	Blank(s)	Blank(s)	Blank(s)	Blank(s)	Blank(s)	Blank(s)
70-74 years	Male	2009	White	Non-Spanish-Hispanic-Latino	Non-Hispanic White	Rectum	Malignant	Rectum	Rectum	8.3 Other malignant	Unclassified	XId malignant melanomas	5. All Other Cancer Types	Rectum	C20.9-Rectum, NOS	209	8720	Malignant	Unknown	Blank(s)	Blank(s)	Not a paired site	Positive histology	8720/3: Malignant melanoma, NOS	8720/3: Malignant melanoma, NOS	8720-8799: nevi and melanomas	XId Malignant melanomas	Rectum	XI(d) Malignant melanomas	XI(d) Malignant melanomas	Not Brain	Blank(s)	Blank(s)	Blank(s)	37 MALIGNANT MELANOMA OF MUCOSA AND EXTRACUTANEOUS	7.1 Melanoma	Regional	Regional	Regional lymph nodes involved only	Regional	Blank(s)	Blank(s)	Blank(s)	Blank(s)	Blank(s)	Blank(s)	Blank(s)	Blank(s)	Blank(s)
75-79 years	Male	2010	White	Non-Spanish-Hispanic-Latino	Non-Hispanic White	Rectum	Malignant	Rectum	Rectum	8.3 Other malignant	Unclassified	XId malignant melanomas	5. All Other Cancer Types	Rectum	C20.9-Rectum, NOS	209	8720	Malignant	Unknown	Blank(s)	Blank(s)	Not a paired site	Positive histology	8720/3: Malignant melanoma, NOS	8720/3: Malignant melanoma, NOS	8720-8799: nevi and melanomas	XId Malignant melanomas	Rectum	XI(d) Malignant melanomas	XI(d) Malignant melanomas	Not Brain	Blank(s)	Blank(s)	Colon and Rectum	37 MALIGNANT MELANOMA OF MUCOSA AND EXTRACUTANEOUS	7.1 Melanoma	Localized	Localized	Localized only	Localized	Blank(s)	Blank(s)	Blank(s)	Blank(s)	NA	NA	NA	NA	Blank(s)
80-84 years	Female	2013	White	Non-Spanish-Hispanic-Latino	Non-Hispanic White	Rectum	Malignant	Rectum	Rectum	8.3 Other malignant	Unclassified	XId malignant melanomas	5. All Other Cancer Types	Rectum	C20.9-Rectum, NOS	209	8720	Malignant	Unknown	Blank(s)	Blank(s)	Not a paired site	Positive histology	8720/3: Malignant melanoma, NOS	8720/3: Malignant melanoma, NOS	8720-8799: nevi and melanomas	XId Malignant melanomas	Rectum	XI(d) Malignant melanomas	XI(d) Malignant melanomas	Not Brain	Blank(s)	Blank(s)	Colon and Rectum	37 MALIGNANT MELANOMA OF MUCOSA AND EXTRACUTANEOUS	7.1 Melanoma	Localized	Localized	Localized only	Localized	Blank(s)	Blank(s)	Blank(s)	Blank(s)	NA	NA	NA	NA	Blank(s)
60-64 years	Female	2014	White	Non-Spanish-Hispanic-Latino	Non-Hispanic White	Rectum	Malignant	Rectum	Rectum	8.3 Other malignant	Unclassified	XId malignant melanomas	5. All Other Cancer Types	Rectum	C20.9-Rectum, NOS	209	8720	Malignant	Unknown	Blank(s)	Blank(s)	Not a paired site	Positive histology	8720/3: Malignant melanoma, NOS	8720/3: Malignant melanoma, NOS	8720-8799: nevi and melanomas	XId Malignant melanomas	Rectum	XI(d) Malignant melanomas	XI(d) Malignant melanomas	Not Brain	Blank(s)	Blank(s)	Colon and Rectum	37 MALIGNANT MELANOMA OF MUCOSA AND EXTRACUTANEOUS	7.1 Melanoma	Distant	Distant	Distant site(s)/node(s) involved	Distant	Blank(s)	Blank(s)	Blank(s)	Blank(s)	NA	NA	NA	NA	Blank(s)
85+ years	Female	2014	White	Non-Spanish-Hispanic-Latino	Non-Hispanic White	Rectum	Malignant	Rectum	Rectum	8.3 Other malignant	Unclassified	XId malignant melanomas	5. All Other Cancer Types	Rectum	C20.9-Rectum, NOS	209	8720	Malignant	Unknown	Blank(s)	Blank(s)	Not a paired site	Positive histology	8720/3: Malignant melanoma, NOS	8720/3: Malignant melanoma, NOS	8720-8799: nevi and melanomas	XId Malignant melanomas	Rectum	XI(d) Malignant melanomas	XI(d) Malignant melanomas	Not Brain	Blank(s)	Blank(s)	Colon and Rectum	37 MALIGNANT MELANOMA OF MUCOSA AND EXTRACUTANEOUS	7.1 Melanoma	Localized	Localized	Localized only	Localized	Blank(s)	Blank(s)	Blank(s)	Blank(s)	NA	NA	NA	NA	Blank(s)
45-49 years	Female	2015	Black	Non-Spanish-Hispanic-Latino	Non-Hispanic Black	Rectum	Malignant	Rectum	Rectum	8.3 Other malignant	Unclassified	XId malignant melanomas	5. All Other Cancer Types	Rectum	C20.9-Rectum, NOS	209	8720	Malignant	Unknown	Blank(s)	Blank(s)	Not a paired site	Positive histology	8720/3: Malignant melanoma, NOS	8720/3: Malignant melanoma, NOS	8720-8799: nevi and melanomas	XId Malignant melanomas	Rectum	XI(d) Malignant melanomas	XI(d) Malignant melanomas	Not Brain	Blank(s)	Blank(s)	Colon and Rectum	37 MALIGNANT MELANOMA OF MUCOSA AND EXTRACUTANEOUS	7.1 Melanoma	Localized	Localized	Localized only	Localized	Blank(s)	Blank(s)	Blank(s)	Blank(s)	NA	NA	NA	NA	Blank(s)
[truncated: 148 more columns]
